# Supplementary material for: Multiple-dose tranexamic acid for perioperative blood loss in total knee arthroplasty in patients with rheumatoid arthritis：a single-blinded, randomised, parallel-controlled study protocol in China
Source: PubMed Central journal article supplement — BMJ Open. 2020 Aug 20;10(8):e034431. doi: 10.1136/bmjopen-2019-034431 (PMC7440821; doi:10.1136/bmjopen-2019-034431), 2020-08-20
Supplement: bmjopen-2019-034431.draft_revisions.pdf [file bmjopen-2019-034431.draft_revisions.pdf]

# BMJ Open

BMJ Open is committed to open peer review. As part of this commitment we make the peer review history of every article we publish publicly available.

When an article is published we post the peer reviewers' comments and the authors' responses online. We also post the versions of the paper that were used during peer review. These are the versions that the peer review comments apply to.

The versions of the paper that follow are the versions that were submitted during the peer review process. They are not the versions of record or the final published versions. They should not be cited or distributed as the published version of this manuscript.

BMJ Open is an open access journal and the full, final, typeset and author-corrected version of record of the manuscript is available on our site with no access controls, subscription charges or pay-per-view fees (<http://bmjopen.bmj.com>).

If you have any questions on BMJ Open's open peer review process please email [info.bmjopen@bmj.com](mailto:info.bmjopen@bmj.com)

# BMJ Open

**Single-blinded, randomized, parallel-controlled study  
evaluating the effects of multiple doses of tranexamic acid  
on perioperative blood loss in total knee arthroplasty in  
patients with rheumatoid arthritis**

|                               |                                                                                                                                                                                                                                                                                                                                                                                                                                                                                                                                                                                                                  |
|-------------------------------|------------------------------------------------------------------------------------------------------------------------------------------------------------------------------------------------------------------------------------------------------------------------------------------------------------------------------------------------------------------------------------------------------------------------------------------------------------------------------------------------------------------------------------------------------------------------------------------------------------------|
| Journal:                      | <i>BMJ Open</i>                                                                                                                                                                                                                                                                                                                                                                                                                                                                                                                                                                                                  |
| Manuscript ID                 | bmjopen-2019-034431                                                                                                                                                                                                                                                                                                                                                                                                                                                                                                                                                                                              |
| Article Type:                 | Protocol                                                                                                                                                                                                                                                                                                                                                                                                                                                                                                                                                                                                         |
| Date Submitted by the Author: | 21-Sep-2019                                                                                                                                                                                                                                                                                                                                                                                                                                                                                                                                                                                                      |
| Complete List of Authors:     | Kang, Bing-xin; Shanghai University of Traditional Chinese Medicine<br>Xu, Hui; Shanghai University of Traditional Chinese Medicine<br>Xiao, Lian-bo; Shanghai Guanghua Hosipital of Integrated Chinese and Western Medicine<br>Gao, Chen-xin; Guanghua Hospital, Shanghai University of Traditional Chinese Medicine<br>Zhong, Sheng; Shanghai Guanghua Hosipital of Integrated Chinese and Western Medicine,<br>Zhang, Jing<br>Xie, Jun; Shanghai University of Traditional Chinese Medicine Guanghua Hospital of Integrated Traditional Chinese Medicine and Western Medicine<br>Ma, Yinghui<br>Zhai, Wei-tao |
| Keywords:                     | Rheumatoid arthritis, tranexamic acid, total knee arthroplasty, perioperative blood management                                                                                                                                                                                                                                                                                                                                                                                                                                                                                                                   |
|                               |                                                                                                                                                                                                                                                                                                                                                                                                                                                                                                                                                                                                                  |

SCHOLARONE™  
Manuscripts

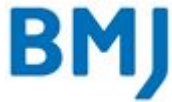

I, the Submitting Author has the right to grant and does grant on behalf of all authors of the Work (as defined in the below author licence), an exclusive licence and/or a non-exclusive licence for contributions from authors who are: i) UK Crown employees; ii) where BMJ has agreed a CC-BY licence shall apply, and/or iii) in accordance with the terms applicable for US Federal Government officers or employees acting as part of their official duties; on a worldwide, perpetual, irrevocable, royalty-free basis to BMJ Publishing Group Ltd ("BMJ") its licensees and where the relevant Journal is co-owned by BMJ to the co-owners of the Journal, to publish the Work in this journal and any other BMJ products and to exploit all rights, as set out in our [licence](#).

The Submitting Author accepts and understands that any supply made under these terms is made by BMJ to the Submitting Author unless you are acting as an employee on behalf of your employer or a postgraduate student of an affiliated institution which is paying any applicable article publishing charge ("APC") for Open Access articles. Where the Submitting Author wishes to make the Work available on an Open Access basis (and intends to pay the relevant APC), the terms of reuse of such Open Access shall be governed by a Creative Commons licence – details of these licences and which [Creative Commons](#) licence will apply to this Work are set out in our licence referred to above.

Other than as permitted in any relevant BMJ Author's Self Archiving Policies, I confirm this Work has not been accepted for publication elsewhere, is not being considered for publication elsewhere and does not duplicate material already published. I confirm all authors consent to publication of this Work and authorise the granting of this licence.

1  
2  
3  
4 **1 Single-blinded, randomized, parallel-controlled study evaluating the effects of**  
5 **2 multiple doses of tranexamic acid on perioperative blood loss in total knee**  
6 **3 arthroplasty in patients with rheumatoid arthritis**  
7  
8  
9

4 Bingxin Kang, Hui Xu, Chenxin Gao, Sheng Zhong, Jing Zhang, Jun Xie , Yinghui Ma,  
11  
12  
13 5 Weitao Zhai, Lianbo Xiao  
14

15 **6 Author Affiliations:**  
16

17  
18 7 Bingxin Kang, MD, Guanghua Hospital, Shanghai University of Traditional Chinese  
19  
20 8 Medicine, Shanghai, China,15738314790@163.com  
21

22  
23 9 Hui Xu, MD, Guanghua Hospital, Shanghai University of Traditional Chinese Medicine,  
24  
25 10 Shanghai, China,1511911882@qq.com  
26

27  
28 11 Chenxin Gao, MD, Guanghua Hospital, Shanghai University of Traditional Chinese  
29  
30 12 Medicine, Shanghai, China, 706046133@qq.com  
31

32  
33 13 Sheng Zhong, MD, Guanghua Hospital, Shanghai University of Traditional Chinese  
34  
35 14 Medicine, Shanghai, China, drcyan@foxmail.com  
36

37  
38 15 Jing Zhang, MD, Guanghua Hospital, Shanghai University of Traditional Chinese  
39  
40 16 Medicine, Shanghai, China, franksamo@126.com  
41

42  
43 17 Jun Xie, MD, Guanghua Hospital, Shanghai University of Traditional Chinese Medicine,  
44  
45 18 Shanghai, China, leoxie199@126.com  
46

47  
48 19 Yinghui Ma, MD, Guanghua Hospital, Shanghai University of Traditional Chinese  
49  
50 20 Medicine, Shanghai, China,hayinghui021@126.com  
51

52  
53 21 Weitao Zhai, MD, Guanghua Hospital, Shanghai University of Traditional Chinese  
54  
55 22 Medicine, Shanghai, China,13901808309@163.com  
56

57  
58 23 Lian-bo Xiao, MD, Guanghua Hospital, Shanghai University of Traditional Chinese  
59  
60 24 Medicine, Shanghai, China, 13701888178@163.com

1  
2  
3  
4 **25 Corresponding Author:**  
5

6  
7 26 Lian-bo Xiao, PhD, Guanghua Hospital, Shanghai University of Traditional Chinese  
8  
9 27 Medicine, No. 540 Xinhua Road, Changning District, Shanghai (CN 200052), China,  
10  
11 28 13701888178@163.com, +8613701888178  
12  
13

14 **29 Author Contributions:**  
15

16  
17 30 BXK and LBX conceived the study while XX, CXG, SZ, JZ, JX, STS, and YHM  
18  
19 31 designed the study. The study protocol was drafted by BXK and LBX. All authors  
20  
21 32 approved the final manuscript of this study protocol.  
22  
23

24  
25 33 **Word Count:3158**  
26

27 **34 Funding:**  
28

29  
30 35 This work will be supported by the Project of Shanghai Municipal Health Planning  
31  
32 36 Commission Grant (ZY (2018-2020)-FWTX-6023).  
33  
34

35 **37 Conflicts of Interests**  
36

37  
38 38 The authors declared that there are no potential conflicts of interest with respect to  
39  
40 39 the research, authorship, and/or publication of this study.  
41  
42

43 **40 Abstract:**  
44

45  
46 41 Introduction: This clinical trial was designed to observe the effect of multiple doses use  
47  
48 42 of tranexamic acid on perioperative hidden blood loss (HBL) in patients with rheumatoid  
49  
50 43 osteoarthritis (RA) and to verify the effectiveness and safety of multiple doses of  
51  
52 44 tranexamic acid on reducing the amount of bleeding during the perioperative period,  
53  
54 45 which can accelerate patient recovery after surgery. This study provides a new clinical  
55  
56 46 evidence for perioperative blood management for total knee arthroplasty (TKA) in  
57  
58  
59  
60

1  
2  
3  
4 47 patients with RA.  
5

6 48 Methods and analysis: We will use a randomized, single-blinded, parallel-controlled  
7  
8  
9 49 study design to evaluate the efficacy of multiple doses use of tranexamic acid during the  
10  
11  
12 50 perioperative period. Before the patient is enrolled, the patient is fully informed of the  
13  
14  
15 51 condition and drug use plan, and the informed consent form is signed to fully inform the  
16  
17  
18 52 benefits and risks that may be obtained by using tranexamic acid multiple doses during  
19  
20  
21 53 the perioperative period. This study will include RA patients (age 50-75 years) with a  
22  
23  
24 54 unilateral primary end-stage TKA who will be randomly divided into group A or group  
25  
26  
27 55 B. The two groups will be given an IV infusion of 1 g of tranexamic acid before the  
28  
29  
30 56 operation, and 1.5 g of tranexamic acid will be administered by intra-articular injection  
31  
32  
33 57 during the surgery. Group A will be intravenously administered with 1 g of tranexamic  
34  
35  
36 58 acid at 3 hours after surgery. Group B will be intravenously administered 1 g of  
37  
38  
39 59 tranexamic acid at the 3<sup>rd</sup>, 6<sup>th</sup>, and 12<sup>th</sup> hours after surgery. The primary outcomes are  
40  
41  
42 60 postoperative hidden blood loss (calculated according to Nadle and Gross's formula), and  
43  
44  
45 61 the amount of change in perioperative haemoglobin. The secondary outcome measures  
46  
47  
48 62 include whole blood inflammatory factors (erythrocyte sedimentation rate and C-reactive  
49  
50  
51 63 protein), serum inflammatory factors (IL-6, IL-12 and TNF- $\alpha$ ), and coagulation  
52  
53  
54 64 parameters (D dimer, thrombin time).The knee function indicators include the knee  
55  
56  
57 65 swelling rates and knee joint range of motion. The adverse events include deep vein  
58  
59  
60 66 thrombosis (DVT), pulmonary embolism (PE), and other complications.

1  
2  
3  
4 67 Ethics and dissemination: This trial has been approved by the Ethics Committee of  
5  
6 68 Shanghai Guanghua Hospital of Integrated Traditional Chinese and Western Medicine,  
7  
8  
9 69 and subsequent modifications of the protocol will be reported and approved by it.  
10

11 70 Ethical number: 2019-K-02 .  
12

13  
14 71 Trial registration number: ChiCTR1900025013  
15

16  
17 72 Patient and Public Involvement: Patients and public will not be involved in the  
18  
19 73 development of the research question or in the design of the study. Patients will receive  
20  
21 74 written information about this trial, and the content includes the benefits, risks and  
22  
23 75 discomforts that may be brought after participating in the study. Patients can also discuss  
24  
25 76 with relatives, friends, or ask the doctor to explain and help them make a decision.  
26  
27 77 However, they will not be involved in the recruitment and conduct of the study. Besides,  
28  
29 78 the burden of the intervention will be assessed by patients themselves. After signing an  
30  
31 79 informed consent by the participant, they will be assessed for eligibility and data  
32  
33 80 collection will begin. Dissemination of the general results (no personal data ) will be  
34  
35 81 made on demand.  
36  
37  
38  
39  
40  
41  
42

43 82 Keywords: Rheumatoid arthritis, tranexamic acid, total knee arthroplasty, perioperative  
44  
45 83 blood management, hidden blood loss, clinical trial protocol  
46  
47

#### 48 84 **Article Summary**

##### 49 85 *Strengths and limitations of this trial*

50  
51  
52  
53 86 This trial is the first trial to use a single-blinded, randomized, parallel-controlled  
54  
55  
56 87 design in China to observe the efficacy and safety of multiple doses of tranexamic acid in  
57  
58 88 the perioperative period of TKA in patients with RA.  
59  
60

1  
2  
3  
4 89 The study use a rigorously study designed , which includes proper randomization,  
5  
6 90 allocation concealment, an adequate sample size and objective clinical test indicators ,and  
7  
8  
9 91 reduces the selectivity bias.

10  
11 92 However, due to some geographical reasons, long-term follow-ups of some patients  
12  
13  
14 93 can only be conducted by phone.

## 17 94 **Introduction**

18  
19 95 Total knee arthroplasty (TKA) was developed in the 1970s. TKA is an effective  
20  
21  
22 96 treatment for various knee arthritis end-stage lesions causing severe pain, deformity and  
23  
24  
25 97 dysfunction of the knee joint.<sup>1</sup> The US epidemiological survey shows that the number of  
26  
27  
28 98 patients undergoing TKA will increase each year.<sup>2</sup> There are 230 million surgeries each  
29  
30  
31 99 year worldwide; joint replacement surgery accounts for the majority for these surgeries,  
32  
33  
34 100 and haemorrhage is one of the major complications in the perioperative period.<sup>3</sup>  
35  
36  
37 101 Excessive blood loss may require an allogeneic blood transfusion. Allogeneic blood  
38  
39  
40 102 transfusion can spread blood diseases, cause immune complications, prolong  
41  
42  
43 103 hospitalization time and increase the infection rate.<sup>4-5</sup> The incidence of anaemia in  
44  
45  
46 104 rheumatoid osteoarthritis (RA) patients is high. Anaemia is negatively associated with  
47  
48  
49 105 rheumatoid arthritis and increase the progression of osteoarthritis damage observed by  
50  
51  
52 106 imaging.<sup>6-7</sup> Therefore, we believe that perioperative blood management in patients with  
53  
54  
55 107 RA is particularly important.

56  
57  
58 108 Hidden blood loss (HBL) is the blood lost during intraoperative and postoperative  
59  
60  
61 109 infiltration into the tissue, residual blood in the knee joint cavity and haemolysis,  
62  
63  
64 110 accounting for 50% of the total blood loss.<sup>8</sup> HBL is not involved in the blood circulation;



1  
2  
3  
4 111 it can cause systemic blood cells, decreases in haemoglobin decrease, local tissue  
5  
6  
7 112 haematoma, poor wound healing, and even wound infections.

8  
9 113 Surgical tourniquet use, can reduce intraoperative bleeding,<sup>8-9</sup> providing a clear view  
10  
11 114 during the surgery, and facilitate the connection between the cement, bone and joint  
12  
13  
14 115 prostheses.<sup>10</sup> However, after the release of the tourniquet, local tissue ischemia  
15  
16  
17 116 reperfusion injury and activation of the fibrinolytic system can occur.<sup>11-12</sup> Peripheral  
18  
19  
20 117 blood circulation accelerates, plasma fibrinolysis becomes enhanced, and postoperative  
21  
22 118 HBL increases.<sup>11</sup> Thus reducing the dissolution of fibrin, can reduce postoperative  
23  
24  
25 119 HBL.<sup>13</sup>

26  
27 120 Tranexamic acid is a synthetic lysine derivative that can competitively inhibit the  
28  
29  
30 121 binding of plasminogen and fibrin, prevents the activation of plasminogen, and protects  
31  
32  
33 122 fibrin from degradation and dissolution by plasmin. Tranexamic acid was initially used in  
34  
35  
36 123 obstetrics and gynaecology and was then gradually applied in surgeries such as  
37  
38  
39 124 cardiothoracic surgery, trauma, joint replacement, and spine surgery to reduce bleeding  
40  
41  
42 125 and blood transfusion rates.<sup>14-16</sup> The CRASH-2 trial has demonstrated the effectiveness  
43  
44  
45 126 and safety of tranexamic acid in reducing blood loss.<sup>17</sup> Currently, tranexamic acid has  
46  
47  
48 127 been recommended as a guideline drug for perioperative blood management during  
49  
50  
51 128 TKA.<sup>18</sup>

52  
53  
54 129 The methods of administering tranexamic acid includes oral administration,  
55  
56  
57 130 intravenous administration , single large dose intravenous administration, intra-articular  
58  
59  
60 131 injection, joint cavity irrigation, postoperative drainage tube injection, and combination  
132 132 therapy.<sup>19-23</sup> However, there is no consensus on the optimal dose of and time of

1  
2  
3  
4 133 administering tranexamic acid during the TKA perioperative period.<sup>14,24-25</sup>  
5

6 134 Studies have shown that fibrinolysis peaks at 6 hours postoperatively and continues  
7  
8  
9 135 occur for approximately 18 hours after TKA with tourniquets.<sup>26</sup> The half-life of  
10  
11  
12 136 tranexamic acid in plasma is 2 hours, and the maximum concentration can be reached by  
13  
14 137 intravenous administration for 1 hour.<sup>27</sup> Thus, we suspect that a single dose of tranexamic  
15  
16  
17 138 acid may not be sufficient for an anti-fibrinolytic effect during the perioperative period of  
18  
19  
20 139 TKA. There are also studies suggesting that for patients with osteoarthritis, higher doses  
21  
22  
23 140 of tranexamic acid during the perioperative period can increase the efficacy of the drug  
24  
25 141 until the dosage reaches a certain upper limit.<sup>16,28-29</sup> The purpose of this clinical trial is to  
26  
27  
28 142 verify the effectiveness and safety of multiple doses of tranexamic acid in reducing blood  
29  
30 143 loss in patients with RA during the perioperative period, improving the enhanced  
31  
32  
33 144 recovery after surgery (ERAS), and providing a new evidence for perioperative blood  
34  
35 145 management for TKA. We will use a large sample size to ensure a credible conclusion.  
36

## 37 146 **Methods and analysis**

### 38 147 *Study context*

39  
40  
41  
42  
43 148 This clinical trial will be conducted at the inpatient ward of Shanghai University of  
44  
45  
46 149 Traditional Chinese Medicine Guanghai Hospital in Shanghai, China on September 1,  
47  
48  
49 150 2019, and there will be 11 investigators, including 2 senior orthopaedic surgeons (L-bX,  
50  
51  
52 151 W-tZ) with 20 years of clinical experience and 6 orthopaedic physicians (C-xG, JZ, JX,  
53  
54 152 S-sT, Y-hM and QS), 2 data collectors and who are also statisticians (B-xK and HX) and  
55  
56 153 a nurse(X-rX). Give patients informed consent before the start of clinical trials. The  
57  
58  
59 154 perioperative ERAS blood management programme and the trial flow chart are shown in  
60

1  
2  
3  
4 155 Table 1 and Figure 1. The schedule is shown in Table 2.  
5  
6

7 156 *Sample size calculation*  
8

9 157 This trial uses a completely randomized design, and multiple sample sizes are  
10  
11 158 estimated by a previous clinical research review. The the main outcome measure is the  
12  
13 159 amount of HBL. The overall mean estimate is  $\sigma = 320$ , and the overall standard deviation  
14  
15  
16  
17 160 is  $\mu = 79$ , using the statistical formula  $n = \frac{z^2 \left( \sum_{i=1}^k \sigma^2 / k \right) \left[ \sum_{i=1}^k (\mu_i - \mu)^2 / (k-1) \right]}{d^2}$ . Considering a dropout  
18  
19 161 rate of 20%, 76 subjects were required to yield a power of 90% with a significance level  
20  
21  
22 162 of 0.05.  
23

24 163 *Randomisation and allocation concealment*  
25

26  
27 164 Patients are randomly assigned to two groups according to a 1:1 ratio; SPSS 25.0 is  
28  
29  
30 165 used to generate a random sequence containing 76 random numbers, that are placed into  
31  
32 166 an opaque envelope and input in a computer by encryption, and the group data is saved  
33  
34  
35 167 by the data collector who is a statistician. Only the nurse will be allowed to check the  
36  
37 168 enrollment and give the corresponding treatment.  
38  
39

40 169 *Single-blinded design*  
41

42  
43 170 The nurse will know the patients' enrolment and give the corresponding treatment.  
44  
45  
46 171 All participants in this trial, including the orthopaedic surgeons and data collectors who  
47  
48 172 are statisticians, are all blinded to the treatment conditions. The outcome assessor will not  
49  
50  
51 173 be aware of the patient's enrolment and will objectively records the patients' test  
52  
53 174 information. When performing the statistical analyses, the independent biostatistician will  
54  
55  
56 175 also be blinded to the conditions.  
57

58 176 *Eligibility criteria*  
59  
60

1  
2  
3  
4 177 The eligibility criteria are in accordance with the " Classification of Rheumatoid  
5  
6 178 Arthritis" from the American Journal of Rheumatism revised in 1978,<sup>30</sup> and the 2010  
7  
8  
9 179 American College of Rheumatology and the European League Against Rheumatism.<sup>31</sup>  
10  
11  
12 180 (1)The patient is diagnosed with RA and the Kellgren-Lawrence<sup>32</sup> classification is Stage  
13  
14 181 III or IV; (2) The patient is aged 55 to 75 years old; (3) The patient will undergo the  
15  
16  
17 182 unilateral primary TKA; (4) The patients received perioperative anti-fibrinolytic  
18  
19  
20 183 tranexamic acid therapy; and (5)The patient did not have preoperative anaemia, and the  
21  
22 184 blood clotting function was normal.

#### 23 24 25 185 *Exclusion criteria*

26  
27 186 The exclusion criteria were as follows:(1) Other types of arthritis (such as primary  
28  
29 187 arthritis, post-traumatic osteoarthritis, gouty osteoarthritis, haemophilic osteoarthritis, and  
30  
31 188 tuberculous arthritis); (2) Bilateral knee arthroplasty in patients with RA; (3) Severe  
32  
33 189 cardiovascular disease (such as myocardial infarction, atrial fibrillation, angina pectoris,  
34  
35  
36 190 and heart failure) or cerebrovascular disease (cerebral infarction and cerebral  
37  
38 191 haemorrhage);and (4) Prolonged use of oral anticoagulant drugs (such as aspirin,  
39  
40 192 warfarin, and clopidogrel).

#### 41 42 43 193 *Elimination criteria*

44  
45 194 The elimination criteria were as follows: (1) Patients with acquired colour vision  
46  
47 195 disorder; (2) Active intravascular coagulation patients; and (3) Patients with a history of  
48  
49 196 convulsions.

#### 50 51 52 197 *Termination criteria*

53  
54 198 The termination criteria were as follows: (1) Shock: once a shock occurs, appropriate  
55  
56 199 therapy is administered to terminate it; (2) Allergic symptoms: such as itching and a rash;  
57  
58  
59 200 (3) Digestive disorders such as nausea, vomiting, loss of appetite, and diarrhoea after  
60

1  
2  
3 201 medication; (4) Reactive dermatitis, dizziness, hypotension, drowsiness, headache;  
4  
5 202 convulsions, visual impairment, and others; and (5) Adverse events such as intracranial  
6  
7 203 thrombosis and intracranial haemorrhage after medication.  
8  
9

10  
11 204 *Surgery and anaesthesia*  
12

13 205 Surgery is performed by senior surgeons (LBX and WTZ).The operations are  
14  
15  
16 206 conducted under general anaesthesia. The median incision of the knee joint, the medial  
17  
18 207 paramedian support band approach, and the length of the incision are approximately  
19  
20  
21 208 14-17cm. Positioning is within the femoral and tibial bone marrow external positions. All  
22  
23  
24 209 patients will use a tourniquet during the operation, and the pressure will be controlled at  
25  
26 210 approximately 230-250mmHg. During the operation, controlled hypotension, a  
27  
28  
29 211 reduction in blood pressure to 20% of the basal blood pressure, will be administered with  
30  
31  
32 212 a postoperative suction drainage tube, and limb surgery will be conducted with an elastic  
33  
34 213 bandage. In the perioperative period, conventional anti-infective, combined analgesic,  
35  
36  
37 214 anti-inflammatory, and anti-coagulation treatment and other symptomatic treatments will  
38  
39  
40 215 be administered according to the "Chinese hip and total knee arthroplasty surgery  
41  
42 216 perioperative anti-fibrinolytic drug sequential anticoagulant application programme  
43  
44  
45 217 expert consensus". Ten min before the incision, 1 g of tranexamic acid + 100mL  
46  
47 218 intravenous saline and 1.5 g of tranexamic acid + 50 mL articular injection of saline will  
48  
49  
50 219 be administered preoperatively in the sutured joint cavity.  
51

52 220 Tranexamic acid is produced by Hunan Dongting Pharmaceutical Co., Ltd., and the  
53  
54  
55 221 implementation standards are found in the following resources: second edition of 2015  
56  
57  
58  
59  
60

1  
2  
3  
4 222 Chinese Pharmacopoeia and drug supplement application approval (2013B02016),

5  
6  
7 223 YBH07372010; the approval number is National Drug Standard H43020565.

8  
9 224 *Study interventions*

10  
11 225 Group A: At the 3rd hour after the operation, 1 g of tranexamic acid + 100 mL of  
12  
13 226 physiological saline is administered intravenously. Group B: 1 g of tranexamic acid + 100  
14  
15 227 mL of physiological saline is intravenously instilled at 3, 6, and 12 hours after the  
16  
17  
18 228 operation.

19  
20 229 *Pain management and rehabilitation*

21  
22 230 A cocktail injection is given during the operation, and 0.2 g of oral celecoxib is  
23  
24 231 given after surgery for analgesia. Anesthesia is given to the athlete's foot after anaesthesia  
25  
26  
27 232 The maximum angle of flexion and extension of the ankle is maintained for 6 seconds,  
28  
29 233 the foot is relaxed for 5 seconds; and the quadriceps contractions are equal between the  
30  
31 234 two sides. On the first postoperative day, the patients will be perform a straight leg raise  
32  
33 235 exercise, a supine knee flexion exercise and a sitting flexion and extension knee exercise;  
34  
35 236 the machine-assisted exercises will begin on the third day after surgery, such as continued  
36  
37  
38 237 passive motion.

39  
40  
41 238 *Antibiotics*

42  
43 239 Cefazolin sodium perioperative antibiotics as prophylaxis are administered 30 min  
44  
45 240 before surgery, and the incision 24-48 hours after the postoperative intravenous infusion.

46  
47 241 *Prevention of lower extremity venous thrombosis*

48  
49 242 Six hours after the perioperative injection, low molecular weight heparin is injected  
50  
51 243 for the prevention of deep vein thrombosis.

52  
53 244 *Outcomes*

54  
55 245 *Primary outcome*

56  
57  
58  
59 246 *Hidden blood lose (HBL) , haemoglobin*

1  
2  
3  
4 247 The amount of HBL is calculated according to the formula by Nadle<sup>33</sup> and Gross  
5  
6 248 formula<sup>34</sup>: Patient's blood volume (PBV)=  $K1 \times \text{height(m)} + K2 \times \text{weight(kg)} +$   
7  
8  
9 249  $K3$ (Male:  $K1=0.3669, K2=0.03219, K3=0.6041$ . Female:  $K1=0.3561, K2=0.03308,$   
10  
11 250  $K3=0.1833$ ).  $\text{HBL} = \text{PBV} \times (\text{Hct}_{\text{pre}} - \text{Hct}_{\text{post}}) / \text{Hct}_{\text{ave}}$ .

12  
13  
14 251 Preoperatively, on the 1st, 3rd, 7th and 14th days after surgery, we will calculate the  
15  
16 252 HBL based on the value of haematocrit and recorded the amount of haemoglobin.

17  
18 253 *Second outcome indicator*

19  
20 254 *Inflammatory index, Inflammatory factor, Coagulation index*

21  
22  
23  
24 255 Preoperatively, on the 1st, 3rd, 7th and 14th days after surgery, we will record the  
25  
26 256 erythrocyte sedimentation rate (ESR) and C-reactive protein (CRP) in the whole blood  
27  
28 257 and interleukin 6 (IL-6), interleukin 12 (IL-12), and tumor necrosis factor  $\alpha$  (TNF- $\alpha$ ) in  
29  
30 258 the plasma.

31  
32  
33  
34 259 Whole blood test indicators and plasma inflammatory factors will be assessed in the  
35  
36 260 Department of Clinical Laboratory of Guanghua Hospital. The indicators and factors will  
37  
38 261 be tested by an inspector who is not involved in this clinical trial.

39  
40 262 *Knee function score and swelling rate*

41  
42  
43 263 Knee function will be measured using the American Keen Society Score (AKSS) at  
44  
45 264 one day before surgery and on the 3rd, 7th and 14th days after surgery. A trained  
46  
47 265 researcher will educate all patients until they fully understand the questionnaire and how  
48  
49 266 to assess their knee function in order to complete the questionnaire. The rate of swelling  
50  
51 267 is defined as the postoperative circumference of the upper tibia divided by the  
52  
53 268 preoperative circumference of the upper tibia.

54  
55  
56 269 *Adverse events*

1  
2  
3 270 Adverse events include the follow: Deep vein thrombosis<sup>35</sup>: (1)Acute onset, affected  
4  
5 271 limb swelling, sever pain, or significant tenderness at the femoral triangle or/and leg; (2)  
6  
7 272 Extensive swelling on the affected limb; (3) The skin of the affected limb has a dull red  
8  
9 273 colour and a rise in temperature ; (4) Generalized shallow venous tension on the affected  
10  
11 274 limb; (5) Homan’s sign and Neuhof’s sign are positive; and (6)Doppler ultrasound for  
12  
13 275 venous blood flow and venography are used to confirm the diagnosis and Pulmonary  
14  
15 276 embolism: Clinical manifestations (cough, chest tightness, palpitations, haemoptysis,  
16  
17 277 shortness of breath, dizziness, shock, cyanosis, increased respiratory rate, arteriovenous  
18  
19 278 filling or pulsation, etc.) and computed tomography are used to identify the occurrence of  
20  
21 279 a pulmonary embolism.  
22  
23  
24  
25

26 280 The wound healing process and complications<sup>36</sup> (wound bleeding, haematoma,  
27  
28 281 wound infection, and deep infection)will be observed and recording during  
29  
30 282 hospitalization and follow-ups. Wound exudation is defined as the exudation of the  
31  
32 283 wound up to 48 hours after surgery.  
33  
34

#### 35 284 *Adverse event processing*

36  
37 285 Adverse events that occur during the use of medication are not necessarily related to  
38  
39 286 drug use, but the content recorded in the CRFs is used to evaluate the relevance of drugs  
40  
41 287 to the follow-up observations. The classification of adverse events will be recorded in  
42  
43 288 accordance with the five-level scoring systems in the 5.0 version of the CTCAE.  
44  
45

46 289 Serious adverse events are defined as those that cause cancer, defects, teratogenicity,  
47  
48 290 danger to the statement, death, and permanent damage to organ function, permanent or  
49  
50 291 significant disability, and prolonged hospital stay. In the event of the above mentioned  
51  
52 292 incidents, the researcher should immediately take appropriate measures with the subjects  
53  
54 293 and report to the hospital sponsors and ethics committees within 24 hours.  
55  
56

#### 57 294 *Data management*

58  
59  
60



1  
2  
3 295 Date entry will be conducted by two independent trained research assistants who are  
4  
5 296 trained to use the paper CRFs. Computer data is entered with a strict specifications ,  
6  
7 297 double-entry input method. The hospital's independent investigators will monitor and  
8  
9 298 audit the data periodically.

### 12 299 *Statistical analysis*

14 300 The analyses are as follows: (1) Descriptive analysis of the characteristics of the  
15  
16 301 study participants; (2) Balance analysis of the baselines values among groups; (3)  
17  
18 302 Comparison of the balance among groups of the primary outcome indicators; and (4)  
19  
20 303 Comparison of secondary outcome indicators and safety indicators among groups.

23 304 The three groups' incidence and the total rate of adverse events are tested by bidirectional  
24  
25 305 disordered R\*C list chi-square test. The association between the occurrence of adverse  
26  
27 306 events and the dose of tranexamic acid used is described.

### 32 307 *Ethics and dissemination*

34 308 This clinical trial has been approved by the ethics committee of Shanghai Guanghua  
35  
36 309 Hospital of Integrated Traditional Chinese and Western Medicine (approval number:  
37  
38 310 2019-K-02). Data will be kept strictly confidential. The results of the trial will be  
39  
40 311 published on the website of the China Clinical Trials Registry and published in  
41  
42 312 peer-reviewed journals.

### 48 313 *Discussion*

50 314 Blood management is an important part of the ERAS programme, which is an  
51  
52 315 evidence-based treatment programme that uses multiple strategies for treating TKA to  
53  
54 316 reduce complications, improve the prognosis and promote rapid recovery after surgery.

57 317 In this trial, we will exclude patients with a large number of intravenous infusions to  
58  
59 318 reduce the effect of blood dilution on the results. We will use a tourniquet and will not

1  
2  
3 319 conducted blood cell return during the operation, and the amount of intraoperative blood  
4  
5 320 loss we will negligible.<sup>37</sup> It has been reported that intravenous infusion combined with  
6  
7 321 intra-articular injection of tranexamic acid may be the optimal therapeutic scheme.<sup>38-39</sup>  
8  
9 322 Previous studies have shown that swelling of the knee joint after TKA is associated with  
10  
11 323 HBL in the joint cavity. Tranexamic acid reduces the degree of swelling around the joint  
12  
13 324 by reducing postoperative HBL.<sup>40</sup> Animal experiments also indicate that plasminogen  
14  
15 325 activators play an important role in the development of inflammation in RA, and the  
16  
17 326 dissolution of fibrin will causes an inflammatory response.<sup>41</sup> Therefore, we suspect that  
18  
19 327 the use of multiple doses of transxamic during the peroperative period may have an  
20  
21 328 auxiliary anti-inflammatory effect.  
22  
23  
24  
25

26 329 In this study, is the sample size is sufficient to obtain true and reliable results. This  
27  
28 330 study will provide new evidence for blood management during the perioperative period  
29  
30 331 of TKA in RA patients.  
31  
32

33 332 **Acknowledgment:** The authors thank all the patient advisers for participating in this  
34  
35 333 study.  
36  
37 334

38  
39 335 References:

- 40  
41 336 1 Xie J, Hu Q, Ma J, *et al.* Multiple boluses of intravenous tranexamic acid to reduce  
42  
43 337 hidden blood loss and the inflammatory response following enhanced recovery  
44  
45 338 primary total hip arthroplasty: A randomised clinical trial. *Bone Jt J*  
46  
47 339 2017;99B:1442–9. doi:10.1302/0301-620X.99B11.BJJ-2017-0488.R1  
48  
49 340 2 Kurtz SM, Ong KL, Lau E, *et al.* Impact of the Economic Downturn on Total Joint  
50  
51 341 Replacement Demand in the United States. *J Bone Jt Surg* 2014;96:624–30.  
52  
53 342 doi:10.2106/JBJS.M.00285  
54  
55 343 3 Ker K, Roberts I. Tranexamic acid for surgical bleeding. *BMJ* 2014;349:10–1.  
56  
57 344 doi:10.1136/bmj.g4934  
58  
59 345 4 Freedman J, Luke K. Blood conservation and transfusion conservation (Ontario  
60

- 1  
2  
3  
4 346 Transfusion Coordinators [ONTraC]). 2008;48:237–50.  
5  
6 347 doi:10.1111/j.1537-2995.2007.01515.x.TRANSFUSION  
7  
8 348 5 McCormack PL. Tranexamic Acid: A review of its use in the treatment of  
9  
10 349 hyperfibrinolysis. *Drugs* 2012;72:585–617.  
11  
12 350 doi:10.2165/11209070-000000000-00000  
13  
14 351 6 Goyal L, Shah PJ, Yadav RN, *et al.* Anaemia in newly diagnosed patients of  
15  
16 352 rheumatoid arthritis and its correlation with disease activity. *J Assoc Physicians*  
17  
18 353 *India* 2018;66:26–9.  
19  
20 354 7 Padjen I, Öhler L, Studenic P, *et al.* Clinical meaning and implications of serum  
21  
22 355 hemoglobin levels in patients with rheumatoid arthritis. *Semin Arthritis Rheum*  
23  
24 356 2017;47:193–8. doi:10.1016/j.semarthrit.2017.03.001  
25  
26 357 8 Sehat KR, Evans R, Newman JH. How much blood is really lost in total knee  
27  
28 358 arthroplasty? *Knee* 2002;7:151–5. doi:10.1016/s0968-0160(00)00047-8  
29  
30 359 9 Tarwala R, Dorr LD, Gilbert PK, *et al.* Tourniquet use during cementation only  
31  
32 360 during total knee arthroplasty: A randomized trial knee. *Clin Orthop Relat Res*  
33  
34 361 2014;472:169–74. doi:10.1007/s11999-013-3124-2  
35  
36 362 10 Hsu K-L, Chang C-W, Yang C-Y, *et al.* Tourniquet Use in Total Knee  
37  
38 363 Arthroplasty. *Prim Total Knee Arthroplast* Published Online First: 2018.  
39  
40 364 doi:10.5772/intechopen.73644  
41  
42 365 11 T. S, N. P, H. R. Use of a Tourniquet in Total Knee Arthroplasty Causes a  
43  
44 366 Paradoxical Increase in Total Blood Loss. *J Bone Jt Surg - Am Vol* 2017;99:1331–  
45  
46 367 6. doi:10.2106/JBJS.16.00750  
47  
48 368 12 Aglietti P, Baldini A, Vena LM, *et al.* Effect of tourniquet use on activation of  
49  
50 369 coagulation in total knee replacement. *Clin Orthop Relat Res* 2000;:169–77.  
51  
52 370 doi:10.1097/00003086-200002000-00021  
53  
54 371 13 Benoni G, Lethagen S, Fredin H. The effect of tranexamic acid on local and plasma  
55  
56 372 fibrinolysis during total knee arthroplasty. *Thromb Res* 1997;85:195–206.  
57  
58 373 doi:10.1016/S0049-3848(97)00004-2  
59  
60 374 14 Jennings JD, Solarz MK, Haydel C. Application of Tranexamic Acid in Trauma  
375 and Orthopedic Surgery. *Orthop Clin North Am* 2016;47:137–43.

- 1  
2  
3  
4 376 doi:10.1016/j.ocl.2015.08.014
- 5  
6 377 15 Napolitano LM, Cohen MJ, Cotton BA, *et al.* Tranexamic acid in trauma. *J*  
7  
8 378 *Trauma Acute Care Surg* 2013;74:1575–86. doi:10.1097/TA.0b013e318292cc54
- 9  
10 379 16 Qiang P, Hong W, Xuan-ming LI, *et al.* Effects of High Doses of Tranexamic Acid  
11  
12 380 on the Fibrinolytic Activity and Inflammatory Response of Patients undergoing  
13  
14 381 Total Knee Arthroplasty \*. 2018;18:3319–22.  
15  
16 382 doi:10.13241/j.cnki.pmb.2018.17.025
- 17  
18 383 17 Collaborators C-2 trial . Effects of tranexamic acid on death, vascular occlusive  
19  
20 384 events, and blood transfusion in trauma patients with significant haemorrhage  
21  
22 385 (CRASH-2): a randomised, placebo-controlled trial. *Lancet* 2010;:23–32.
- 23  
24 386 18 Zhen Y, Zongke Z, Fuxing P, *et al.* An expert consensus on the application of an  
25  
26 387 anti-fibrinolytic anticoagulant drug during the perioperative period following hip  
27  
28 388 and knee joint replacement in China. *Chinese Journal of Bone and Joint Surgery.*  
29  
30 389 *Chinese Journal of Bone and Joint Surgery.* 2015;8:281–5.
- 31  
32 390 19 Lei Y, Xie J, Xu B, *et al.* The efficacy and safety of multiple-dose intravenous  
33  
34 391 tranexamic acid on blood loss following total knee arthroplasty: a randomized  
35  
36 392 controlled trial. *Int Orthop* 2017;41:2053–9. doi:10.1007/s00264-017-3519-x
- 37  
38 393 20 Hu WH. Efficacy of intravenous versus topical administration of tranexamic acid  
39  
40 394 in primary total knee arthroplasty. *Chinese J Tissue Eng Res* 2018;22:356–61.  
41  
42 395 doi:10.3969/j.issn.2095-4344.0030
- 43  
44 396 21 Yue C, Kang P, Yang P, *et al.* Topical application of tranexamic acid in primary  
45  
46 397 total hip arthroplasty: A randomized double-blind controlled trial. *J Arthroplasty*  
47  
48 398 2014;29:2452–6. doi:10.1016/j.arth.2014.03.032
- 49  
50 399 22 Liu W, Yang C, Huang X, *et al.* Tranexamic Acid Reduces Occult Blood Loss,  
51  
52 400 Blood Transfusion, and Improves Recovery of Knee Function after Total Knee  
53  
54 401 Arthroplasty: A Comparative Study. *J Knee Surg* 2018;31:239–46.  
55  
56 402 doi:10.1055/s-0037-1602248
- 57  
58 403 23 Yang Y, Lv YM, Ding PJ, *et al.* The reduction in blood loss with intra-articular  
59  
60 404 injection of tranexamic acid in unilateral total knee arthroplasty without operative  
405 405 drains: A randomized controlled trial. *Eur J Orthop Surg Traumatol* 2015;25:135–

- 1  
2  
3  
4 406 9. doi:10.1007/s00590-014-1461-9
- 5  
6 407 24 Young B, Moondi P. A questionnaire-based survey investigating the current use of  
7  
8 408 tranexamic acid in traumatic haemorrhage and elective hip and knee arthroplasty.  
9  
10 409 *JRSM Open* 2014;5:204253331351694. doi:10.1177/2042533313516949
- 11  
12 410 25 Cid J, Lozano M. Tranexamic acid reduces allogeneic red cell transfusions in  
13  
14 411 patients undergoing total knee arthroplasty: Results of a meta-analysis of  
15  
16 412 randomized controlled trials. *Transfusion* 2005;45:1302–7.  
17  
18 413 doi:10.1111/j.1537-2995.2005.00204.x
- 19  
20 414 26 Blanié A, Bellamy L, Rhayem Y, *et al.* Duration of postoperative fibrinolysis after  
21  
22 415 total hip or knee replacement: A laboratory follow-up study. *Thromb Res*  
23  
24 416 2013;131:e6–11. doi:10.1016/j.thromres.2012.11.006
- 25  
26 417 27 Hunt BJ. The current place of tranexamic acid in the management of bleeding.  
27  
28 418 *Anaesthesia* 2015;70:e18-53. doi:10.1111/anae.12910
- 29  
30 419 28 Demos HA, Lin ZX, Barfield WR, *et al.* Process Improvement Project Using  
31  
32 420 Tranexamic Acid Is Cost-Effective in Reducing Blood Loss and Transfusions  
33  
34 421 After Total Hip and Total Knee Arthroplasty. *J Arthroplasty* 2017;32:2375–80.  
35  
36 422 doi:10.1016/j.arth.2017.02.068
- 37  
38 423 29 Tang Y, Wen Y, Li W, *et al.* The efficacy and safety of multiple doses of oral  
39  
40 424 tranexamic acid on blood loss, inflammatory and fibrinolysis response following  
41  
42 425 total knee arthroplasty: A randomized controlled trial. *Int J Surg* 2019;65:45–51.  
43  
44 426 doi:10.1016/j.ijssu.2019.03.011
- 45  
46 427 30 GB/T 7714 SILMAN AJ. THE 1987 REVISED AMERICAN RHEUMATISM  
47  
48 428 ASSOCIATION CRITERIA FOR RHEUMATOID ARTHRITIS. *Rheumatology*  
49  
50 429 1988;27:341–3.
- 51  
52 430 31 Britsemmer K, Ursum J, Gerritsen M, *et al.* Validation of the 2010 ACR/EULAR  
53  
54 431 classification criteria for rheumatoid arthritis: Slight improvement over the 1987  
55  
56 432 ACR criteria. *Ann Rheum Dis* 2011;70:1468–70. doi:10.1136/ard.2010.148619
- 57  
58 433 32 Kohn MD, Sassoon AA, Fernando ND. Classifications in Brief:  
59  
60 434 Kellgren-Lawrence Classification of Osteoarthritis. *Clin Orthop Relat Res*  
435 2016;474:1886–93. doi:10.1007/s11999-016-4732-4

- 1  
2  
3  
4 436 33 S N. Prediction of blood volume in normal human adults. *Surgery* 1961;:51.
- 5  
6 437 34 JB G. Estimating Allowable Blood Loss: Correceted for Dilution. *Anesthesiology*.  
7  
8 438 1983;58:277–80.
- 9  
10 439 35 Chin J V. Guidelines for the diagnosis and treatment of deep vein thrombosis. *Chin*  
11  
12 440 *J Vasc Surg (Electronic Version)* 2017;9:250–8.
- 13  
14 441 36 Larson EL, Pearson ML, Lee JT, *et al*. GUIDELINE FOR PREVENTION OF  
15  
16 442 SURGICAL SITE Table of Contents. *Infection Control and Hospital*  
17  
18 443 *Epidemiology* 1999;20:250-280.
- 19  
20 444 37 Sehat KR, Evans R, Newman JH. How much blood is really lost in total knee  
21  
22 445 arthroplasty? Correct blood loss management should take hidden loss into account.  
23  
24 446 *Knee* 2000;7:151–5. doi:10.1016/S0968-0160(00)00047-8
- 25  
26 447 38 Mi B, Liu G, Lv H, *et al*. Is combined use of intravenous and intraarticular  
27  
28 448 tranexamic acid superior to intravenous or intraarticular tranexamic acid alone in  
29  
30 449 total knee arthroplasty? A meta-analysis of randomized controlled trials. *J Orthop*  
31  
32 450 *Surg Res* 2017;12:1–9. doi:10.1186/s13018-017-0559-2
- 33  
34 451 39 Iseki T, Tsukada S, Wakui M, *et al*. Intravenous tranexamic acid only versus  
35  
36 452 combined intravenous and intra-articular tranexamic acid for perioperative blood  
37  
38 453 loss in patients undergoing total knee arthroplasty. *Eur J Orthop Surg Traumatol*  
39  
40 454 2018;28:1397–402. doi:10.1007/s00590-018-2210-2
- 41  
42 455 40 Ishida K, Tsumura N, Kitagawa A, *et al*. Intra-articular injection of tranexamic acid  
43  
44 456 reduces not only blood loss but also knee joint swelling after total knee  
45  
46 457 arthroplasty. *Int Orthop* 2011;35:1639–45. doi:10.1007/s00264-010-1205-3
- 47  
48 458 41 Li J, Ny A, Leonardsson G, *et al*. The plasminogen activator/plasmin system is  
49  
50 459 essential for development of the joint inflammatory phase of collagen type  
51  
52 460 II-induced arthritis. *Am J Pathol* 2005;166:783–92.  
53  
54 461 doi:10.1016/S0002-9440(10)62299-7  
55  
56 462

Table 1 Enhanced recovery after surgery blood management

Preoperative

Treatment of hemorrhagic primary disease

1  
2  
3 Nutritional guidance, balanced diet

4 Iron application

5 rHuEPO application

6 Intraoperative

7 Minimally invasive surgery

8 Tourniquet optimization

9 Controlled buck

10 Autologous blood return

11 Use of tranexamic acid

12 Postoperative

13 Reduce bleeding (pressure dressing of wounds, prevent stress ulcers)

14 Nutritional support, iron supplementation, use of rHuEPO

15  
16  
17  
18  
19  
20  
21  
22 RHuEPO, Human recombinant erythropoietin.  
23  
24

25  
26  
27  
28  
29 Table 2. The schedule of trial enrolment, interventions and assessments

30  
31  
32

| Patients recruitment                           | Time period for collecting data |    |    |    |     |
|------------------------------------------------|---------------------------------|----|----|----|-----|
|                                                | Pre-OP                          | D1 | D3 | D7 | D14 |
| Enrolment                                      | ●                               |    |    |    |     |
| Assessment of eligibility                      | ●                               |    |    |    |     |
| Randomisation                                  | ●                               |    |    |    |     |
| Group A                                        |                                 |    |    |    |     |
| Post-OP 1 dose                                 | ●                               | ●  | ●  | ●  | ●   |
| Group B                                        |                                 |    |    |    |     |
| Post-OP 3 doses                                | ●                               | ●  | ●  | ●  | ●   |
| HBL                                            |                                 | ●  | ●  | ●  | ●   |
| Hb                                             | ●                               | ●  | ●  | ●  | ●   |
| Inflammatory index                             | ●                               | ●  | ●  | ●  | ●   |
| inflammatory factor                            | ●                               | ●  | ●  | ●  | ●   |
| coagulation index                              | ●                               | ●  | ●  | ●  | ●   |
| Swelling rate                                  |                                 | ●  | ●  | ●  | ●   |
| DVP                                            |                                 | ●  | ●  | ●  | ●   |
| PE                                             |                                 | ●  | ●  | ●  | ●   |
| Postoperative complications and adverse events |                                 | ●  | ●  | ●  | ●   |

33  
34  
35  
36  
37  
38  
39  
40  
41  
42  
43  
44  
45  
46  
47  
48  
49  
50  
51  
52  
53  
54  
55  
56  
57  
58  
59  
60

---

OP, operation; HBL, hidden blood lose; Hb, Hemoglobin; DVP, deep vein thrombosis;  
PE, pulmonary embolism

463

For peer review only



1  
2  
3  
4  
5  
6  
7  
8  
9  
10  
11  
12  
13  
14  
15  
16  
17  
18  
19  
20  
21  
22  
23  
24  
25  
26  
27  
28  
29  
30  
31  
32  
33  
34  
35  
36  
37  
38  
39  
40  
41  
42  
43  
44  
45  
46  
47  
48  
49  
50  
51  
52  
53  
54  
55  
56  
57  
58  
59  
60

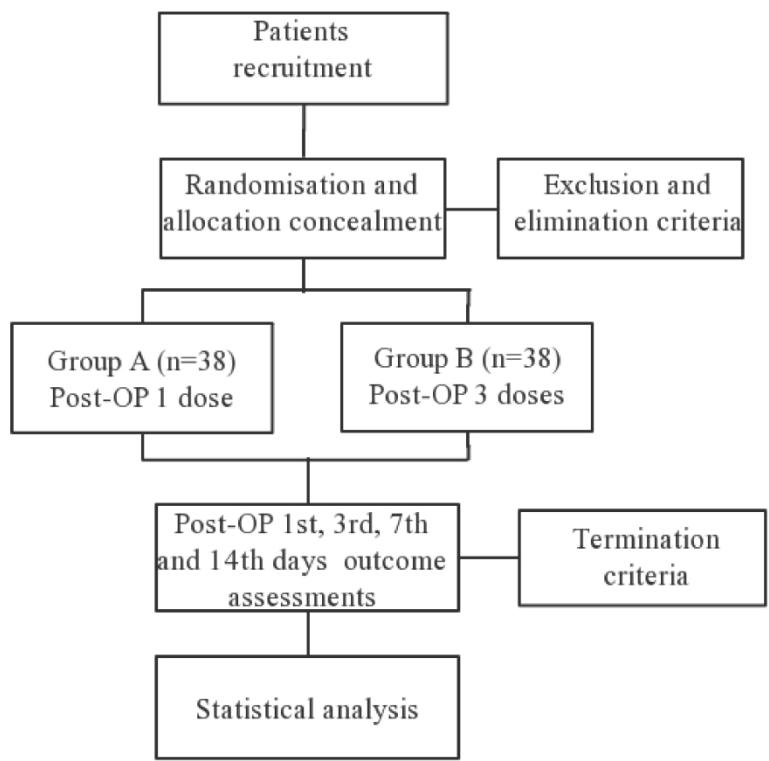

The flow chart of this test  
232x214mm (300 x 300 DPI)

# BMJ Open

**The protocol of a single-blinded, randomized, parallel-controlled study to evaluate the effects of multiple-dose of tranexamic acid on perioperative blood loss in total knee arthroplasty in patients with rheumatoid arthritis**

|                                 |                                                                                                                                                                                                                                                                                                                                                                                                                                                                                                                                                                                                                                                                                                                                                                                                                                                                                                                                                                                                                                                                                                                                                                                                                                                                                                                                                                                                                                                                                                                                                                                                                                                                                                                                                                  |
|---------------------------------|------------------------------------------------------------------------------------------------------------------------------------------------------------------------------------------------------------------------------------------------------------------------------------------------------------------------------------------------------------------------------------------------------------------------------------------------------------------------------------------------------------------------------------------------------------------------------------------------------------------------------------------------------------------------------------------------------------------------------------------------------------------------------------------------------------------------------------------------------------------------------------------------------------------------------------------------------------------------------------------------------------------------------------------------------------------------------------------------------------------------------------------------------------------------------------------------------------------------------------------------------------------------------------------------------------------------------------------------------------------------------------------------------------------------------------------------------------------------------------------------------------------------------------------------------------------------------------------------------------------------------------------------------------------------------------------------------------------------------------------------------------------|
| Journal:                        | <i>BMJ Open</i>                                                                                                                                                                                                                                                                                                                                                                                                                                                                                                                                                                                                                                                                                                                                                                                                                                                                                                                                                                                                                                                                                                                                                                                                                                                                                                                                                                                                                                                                                                                                                                                                                                                                                                                                                  |
| Manuscript ID                   | bmjopen-2019-034431.R1                                                                                                                                                                                                                                                                                                                                                                                                                                                                                                                                                                                                                                                                                                                                                                                                                                                                                                                                                                                                                                                                                                                                                                                                                                                                                                                                                                                                                                                                                                                                                                                                                                                                                                                                           |
| Article Type:                   | Protocol                                                                                                                                                                                                                                                                                                                                                                                                                                                                                                                                                                                                                                                                                                                                                                                                                                                                                                                                                                                                                                                                                                                                                                                                                                                                                                                                                                                                                                                                                                                                                                                                                                                                                                                                                         |
| Date Submitted by the Author:   | 11-Jan-2020                                                                                                                                                                                                                                                                                                                                                                                                                                                                                                                                                                                                                                                                                                                                                                                                                                                                                                                                                                                                                                                                                                                                                                                                                                                                                                                                                                                                                                                                                                                                                                                                                                                                                                                                                      |
| Complete List of Authors:       | <p>Kang, Bing-xin; Guanghua Hospital of Integrated Traditional Chinese Medicine and Western Medicine, Shanghai University of Traditional Chinese Medicine, Orthopaedics</p> <p>Xu, Hui; Guanghua Hospital of Integrated Traditional Chinese Medicine and Western Medicine, Shanghai University of Traditional Chinese Medicine, Orthopaedics</p> <p>Gao, Chen-xin; Guanghua Hospital of Integrated Traditional Chinese Medicine and Western Medicine, Shanghai University of Traditional Chinese Medicine, Orthopaedics</p> <p>Zhong, Sheng; Guanghua Hospital of Integrated Traditional Chinese Medicine and Western Medicine, Shanghai University of Traditional Chinese Medicine, Orthopaedics</p> <p>Zhang, Jing; Guanghua Hospital of Integrated Traditional Chinese Medicine and Western Medicine, Shanghai University of Traditional Chinese Medicine, Orthopaedics</p> <p>Xie, Jun; Guanghua Hospital of Integrated Traditional Chinese Medicine and Western Medicine, Shanghai University of Traditional Chinese Medicine, Orthopaedics</p> <p>Sun, Song-tao ; Guanghua Hospital of Integrated Traditional Chinese Medicine and Western Medicine, Shanghai University of Traditional Chinese Medicine, Orthopaedics</p> <p>Ma, Ying-hui; Guanghua Hospital of Integrated Traditional Chinese Medicine and Western Medicine, Shanghai University of Traditional Chinese Medicine, Orthopaedics</p> <p>Zhai, Wei-tao; Guanghua Hospital of Integrated Traditional Chinese Medicine and Western Medicine, Shanghai University of Traditional Chinese Medicine, Orthopaedics</p> <p>Xiao, Lian-bo; Guanghua Hospital of Integrated Traditional Chinese Medicine and Western Medicine, Shanghai University of Traditional Chinese Medicine, Orthopaedics</p> |
| <b>Primary Subject Heading</b>: | Medical management                                                                                                                                                                                                                                                                                                                                                                                                                                                                                                                                                                                                                                                                                                                                                                                                                                                                                                                                                                                                                                                                                                                                                                                                                                                                                                                                                                                                                                                                                                                                                                                                                                                                                                                                               |
| Secondary Subject Heading:      | Surgery                                                                                                                                                                                                                                                                                                                                                                                                                                                                                                                                                                                                                                                                                                                                                                                                                                                                                                                                                                                                                                                                                                                                                                                                                                                                                                                                                                                                                                                                                                                                                                                                                                                                                                                                                          |
| Keywords:                       | Rheumatoid arthritis, tranexamic acid, total knee arthroplasty, perioperative blood management, Knee < ORTHOPAEDIC & TRAUMA                                                                                                                                                                                                                                                                                                                                                                                                                                                                                                                                                                                                                                                                                                                                                                                                                                                                                                                                                                                                                                                                                                                                                                                                                                                                                                                                                                                                                                                                                                                                                                                                                                      |

1  
2  
3  
4  
5  
6  
7  
8  
9  
10  
11  
12  
13  
14  
15  
16  
17  
18  
19  
20  
21  
22  
23  
24  
25  
26  
27  
28  
29  
30  
31  
32  
33  
34  
35  
36  
37  
38  
39  
40  
41  
42  
43  
44  
45  
46  
47  
48  
49  
50  
51  
52  
53  
54  
55  
56  
57  
58  
59  
60

|  |                                                                 |
|--|-----------------------------------------------------------------|
|  | SURGERY, Paediatric orthopaedics < ORTHOPAEDIC & TRAUMA SURGERY |
|  |                                                                 |

SCHOLARONE™  
Manuscripts



I, the Submitting Author has the right to grant and does grant on behalf of all authors of the Work (as defined in the below author licence), an exclusive licence and/or a non-exclusive licence for contributions from authors who are: i) UK Crown employees; ii) where BMJ has agreed a CC-BY licence shall apply, and/or iii) in accordance with the terms applicable for US Federal Government officers or employees acting as part of their official duties; on a worldwide, perpetual, irrevocable, royalty-free basis to BMJ Publishing Group Ltd ("BMJ") its licensees and where the relevant Journal is co-owned by BMJ to the co-owners of the Journal, to publish the Work in this journal and any other BMJ products and to exploit all rights, as set out in our [licence](#).

The Submitting Author accepts and understands that any supply made under these terms is made by BMJ to the Submitting Author unless you are acting as an employee on behalf of your employer or a postgraduate student of an affiliated institution which is paying any applicable article publishing charge ("APC") for Open Access articles. Where the Submitting Author wishes to make the Work available on an Open Access basis (and intends to pay the relevant APC), the terms of reuse of such Open Access shall be governed by a Creative Commons licence – details of these licences and which [Creative Commons](#) licence will apply to this Work are set out in our licence referred to above.

Other than as permitted in any relevant BMJ Author's Self Archiving Policies, I confirm this Work has not been accepted for publication elsewhere, is not being considered for publication elsewhere and does not duplicate material already published. I confirm all authors consent to publication of this Work and authorise the granting of this licence.

1 **The protocol of a single-blinded, randomized, parallel-controlled study to**  
2 **evaluate the effects of multiple-dose of tranexamic acid on perioperative blood**  
3 **loss in total knee arthroplasty in patients with rheumatoid arthritis**

4 Bing-xin Kang, Hui Xu, Chen-xin Gao, Sheng Zhong, Jing Zhang, Jun Xie, Song-tao  
5 Sun, Ying-hui Ma, Wei-tao Zhai, Lian-bo Xiao

6 **Author Affiliations:**

7 Bing-xin Kang, MD, Department of Orthopaedics, Guanghua Hospital of Integrated  
8 Traditional Chinese Medicine and Western Medicine, Shanghai University of  
9 Traditional Chinese Medicine, Shanghai, China,15738314790@163.com

10 Hui Xu, MD, Department of Orthopaedics, Guanghua Hospital of Integrated  
11 Traditional Chinese Medicine and Western Medicine, Shanghai University of  
12 Traditional Chinese Medicine, Shanghai, China,1511911882@qq.com

13 Chen-xin Gao, MD, Department of Orthopaedics, Guanghua Hospital of Integrated  
14 Traditional Chinese Medicine and Western Medicine, Shanghai University of  
15 Traditional Chinese Medicine, Shanghai, China, 706046133@qq.com

16 Sheng Zhong, MD, Department of Orthopaedics, Guanghua Hospital of Integrated  
17 Traditional Chinese Medicine and Western Medicine, Shanghai University of  
18 Traditional Chinese Medicine, Shanghai, China, drcyan@foxmail.com

19 Jing Zhang, MD, Department of Orthopaedics, Guanghua Hospital of Integrated  
20 Traditional Chinese Medicine and Western Medicine, Shanghai University of  
21 Traditional Chinese Medicine, Shanghai, China,franksamo@126.com

22 Jun Xie, MD, Department of Orthopaedics, Guanghua Hospital of Integrated

1  
2  
3  
4 23 Traditional Chinese Medicine and Western Medicine, Shanghai University of  
5  
6  
7 24 Traditional Chinese Medicine, Shanghai, China, leoxie199@126.com  
8  
9 25 Song-tao Sun, MD, Department of Orthopaedics, Guanghua Hospital of Integrated  
10  
11  
12 26 Traditional Chinese Medicine and Western Medicine, Shanghai University of  
13  
14  
15 27 Traditional Chinese Medicine, Shanghai, China, sstever0156258@aliyun.com  
16  
17 28 Ying-hui Ma, MD, Department of Orthopaedics, Guanghua Hospital of Integrated  
18  
19  
20 29 Traditional Chinese Medicine and Western Medicine, Shanghai University of  
21  
22  
23 30 Traditional Chinese Medicine, Shanghai, China, mayinghui021@126.com  
24  
25 31 Wei-tao Zhai, MD, Department of Orthopaedics, Guanghua Hospital of Integrated  
26  
27  
28 32 Traditional Chinese Medicine and Western Medicine, Shanghai University of  
29  
30  
31 33 Traditional Chinese Medicine, Shanghai, China, 13901808309@163.com  
32  
33 34 Lian-bo Xiao, MD, Department of Orthopaedics, Guanghua Hospital of Integrated  
34  
35  
36 35 Traditional Chinese Medicine and Western Medicine, Shanghai University of  
37  
38  
39 36 Traditional Chinese Medicine, Shanghai, China, 13701888178@163.com  
40  
41 37 Bing-xin Kang and Hui Xu contributed equally to this paper.  
42

43 **Corresponding Author:**

44  
45 39 Lian-bo Xiao, PhD, Guanghua Hospital of Integrated Traditional Chinese Medicine  
46  
47  
48 40 and Western Medicine, Shanghai University of Traditional Chinese Medicine. No.  
49  
50  
51 41 540 Xinhua Road, Changning District, Shanghai (CN 200000), China,  
52  
53 42 13701888178@163.com, +8613701888178  
54  
55

56 43

57  
58 44 **Author Contributions:**  
59  
60

1  
2  
3  
4 45 BXK, HX and LBX conceived the study while CXG, SZ, JZ, JX, STS, YHM,  
5  
6 46 and WTZ designed the study. The study protocol was drafted by BXK and HX. All  
7  
8  
9 47 authors approved the final manuscript of this study protocol.  
10

11  
12 48 **Word Count: 2714**

13  
14 49 **Funding:**

15  
16  
17 50 This research received no specific grant from any funding agency in the public,  
18  
19 51 commercial or not-for-profit sectors.  
20  
21

22 52 **Conflicts of Interests**

23  
24  
25 53 The authors declared that there are no potential conflicts of interest with respect  
26  
27 54 to the research, authorship, and/or publication of this study.  
28  
29

30  
31  
32 56 **Abstract:**

33  
34  
35 57 Introduction: This clinical trial is designed to evaluate the effect of multiple-dose  
36  
37 58 tranexamic acid (TXA) on perioperative hidden blood loss (HBL) in patients with  
38  
39 59 rheumatoid osteoarthritis (RA).  
40  
41

42  
43 60 Methods and analysis: A randomized, single-blinded, parallel-controlled study design  
44  
45 61 will be designed. RA patients (age 50-75 years) undergoing unilateral primary  
46  
47 62 end-stage TKA will be randomly divided into Group A or Group B. Group A will be  
48  
49 63 treated with one dose of TXA (1g; intravenous injection at the 3<sup>rd</sup>hour) and Group B  
50  
51 64 with three doses (at the 3<sup>rd</sup>, 6<sup>th</sup>, and 12<sup>th</sup> hours; intravenous injection) after surgery.  
52  
53

54  
55  
56 65 The primary outcomes will be evaluated with hidden blood loss and haemoglobin  
57  
58 66 level and the secondary outcomes with blood inflammatory factors, serum  
59  
60

1  
2  
3  
4 67 inflammatory factors, and coagulation parameters.  
5

6 68 Ethics and dissemination: This trial has been approved by the Ethics Committee of  
7

8  
9 69 Shanghai Guanghua Hospital of Integrated Traditional Chinese and Western  
10

11 70 Medicine.  
12

13  
14 71 Ethical number: 2019-K-13.  
15

16  
17 72 Trial registration number: ChiCTR1900025013  
18

19 73 Keywords: Rheumatoid arthritis, tranexamic acid, total knee arthroplasty,  
20

21 74 perioperative blood management, hidden blood loss, clinical trial protocol.  
22  
23  
24

25 75  
26

## 27 76 **Article Summary**

### 28 29 77 *Strengths and limitations of this trial*

30  
31  
32 78 (1)This is the first single-blinded, randomized, parallel-controlled study in China  
33

34  
35 79 to evaluate the efficacy and safety of perioperative multiple-dose regimen of  
36

37  
38 80 tranexamic acid after TKA in patients with RA.  
39

40 81 (2)The study has its bias largely reduced by rigorously study designs, including  
41

42  
43 82 proper randomization, allocation concealment, an adequate sample size and  
44

45  
46 83 objective indicators.  
47

48 84 (3)Long-term follow-ups of some patients can only be conducted by phone. And  
49

50  
51 85 the results can only be extrapolated to Chinese RA population.  
52

53 86  
54

## 55 56 87 **Introduction**

57  
58 88 Rheumatoid arthritis (RA) may be accompanied by hematological diseases, like  
59  
60



1  
2  
3  
4 89 anemia.<sup>1</sup>The overall prevalence of RA is 0.5-1% in Europe and North America,  
5  
6 90 0.31% in France, 0.32-0.38% in China, and 0.02-0.047% in Japan.<sup>2-3</sup> Total knee  
7  
8  
9 91 arthroplasty (TKA) is effective in treating flexion contracture and maintaining the  
10  
11  
12 92 stability of RA knee.<sup>4</sup> About 0.005% of RA patients receive TKA, a rate that has  
13  
14 93 gradually decreased over the past decades. Even though, surgery remains the first  
15  
16  
17 94 choice for articular deformity and pain, despite that disease-modifying antirheumatic  
18  
19 95 drugs (DMARDs) and biologics agents can manage synovitis-related symptoms in  
20  
21  
22 96 RA patients.<sup>5</sup> The haemorrhage is a major perioperative complications of TKA.<sup>6</sup>  
23  
24  
25 97 Excessive blood loss should be replenished with allogeneic blood transfusion, but it  
26  
27  
28 98 may cause immune complications, prolong hospitalization time and increase the  
29  
30 99 infection rate.<sup>7-8</sup> Haemoglobin has an obviously negative correlation with disease  
31  
32  
33 100 activity in RA.<sup>9</sup> Therefore, we believe that perioperative blood management is need  
34  
35 101 for patients with RA.

36  
37  
38 102 Accounting for 50% of the total blood loss, hidden blood loss (HBL) happens as  
39  
40 103 the blood lost infiltrates into the tissue intraoperatively and postoperatively, resides in  
41  
42  
43 104 the knee joint cavity and gets haemolyzed.<sup>10</sup> As this blood is not involved in the blood  
44  
45  
46 105 circulation, HBL often leads to the postoperative pain, lower limb swelling, poor  
47  
48 106 wound healing, postoperative inflammation, and even wound infections.

49  
50  
51 107 Surgical tourniquet use, can reduce intraoperative bleeding,<sup>11</sup> provide a clear  
52  
53 108 view during the surgery, and facilitate the connection between the cement, bone and  
54  
55  
56 109 joint prostheses.<sup>12</sup> However, after the release of the tourniquet, local tissue  
57  
58  
59 110 may be damaged by ischemia reperfusion injury, and fibrinolytic system  
60

1  
2  
3  
4 111 activated.<sup>13-14</sup> As a consequence, peripheral blood circulation is accelerated, plasma  
5  
6 112 fibrinolysis enhanced, and postoperative HBL increased.<sup>13</sup> Therefore, reducing the  
7  
8  
9 113 dissolution of fibrin can reduce postoperative HBL.<sup>15</sup> Tranexamic acid (TXA) is a  
10  
11 114 synthetic lysine derivative that can competitively inhibit the binding between  
12  
13  
14 115 plasminogen and fibrin, prevent the activation of plasminogen, and protect fibrin from  
15  
16  
17 116 degradation and dissolution by plasmin. TXA is initially used in obstetrics and  
18  
19  
20 117 gynaecology, then gradually replicated in surgeries to reduce bleeding and avoid  
21  
22 118 blood transfusion rates.<sup>16-17</sup> The CRASH-2 trial has demonstrated the effectiveness  
23  
24  
25 119 and safety of TXA in reducing blood loss.<sup>18</sup> A large amount of literature has reported  
26  
27 120 that TXA can significantly reduce peri-TKA blood loss.<sup>19-23</sup> Currently, TXA is  
28  
29  
30 121 recommended for perioperative blood management of TKA.<sup>24</sup> But, its efficacy and  
31  
32 122 safety in RA patients undergoing TKA has been rarely reported.<sup>25</sup> TXA can be  
33  
34  
35 123 administered through oral intake, single large-dose intravenous injection,  
36  
37  
38 124 intra-articular injection, joint cavity irrigation, postoperative drainage tube injection,  
39  
40  
41 125 and combination use.<sup>23,26-29</sup> There is no consensus on the optimal dose and time of  
42  
43 126 TXA administration during perioperative TKA.<sup>16,30-31</sup> Studies have shown that  
44  
45 127 fibrinolysis peaks at 6 hours and continues for approximately 18 hours after TKA  
46  
47  
48 128 with tourniquets.<sup>32</sup> The half-life of TXA in plasma is 2 hours, and its concentration  
49  
50  
51 129 peaks at 1 hour after injection.<sup>33</sup> Thus, we suspect that a single dose of TXA may not  
52  
53  
54 130 be sufficient to exert an anti-fibrinolytic. There are also studies suggesting that for  
55  
56 131 patients with osteoarthritis, higher doses (within a limit) during the perioperative  
57  
58  
59 132 period can increase the efficacy of TXA.<sup>34-36</sup> The purpose of this clinical trial is to  
60

1  
2  
3  
4 133 verify the effectiveness and safety of multiple doses of TXA in reducing perioperative  
5  
6 134 blood loss in RA patients treated with TKA, hoping to find a new mode of  
7  
8  
9 135 perioperative blood management for TKA.  
10

11  
12 136

## 137 **Methods and analysis**

### 138 *Study context*

139 This clinical trial will start on September 1, 2019 at the wards of Shanghai  
140 University of Traditional Chinese Medicine Guanghai Hospital (Shanghai,  
141 China). The annual surgical number of TKA for RA patients was about 300 in 2018.  
142 Eleven investigators include 2 senior orthopaedic surgeons (L-bX, W-tZ) with 20  
143 years of clinical experience and 6 orthopaedic physicians (C-xG, JZ, JX, S-sT, Y-hM  
144 and SZ), 2 data collectors and who are also statisticians (B-xK and HX) and a  
145 nurse (X-rX). Informed consent will be obtained. The perioperative ERAS blood  
146 management programme and the trial flow chart are shown in Table 1 and Figure 1.  
147 The schedule is shown in Table 2.

### 148 *Sample size calculation*

149 This trial uses a completely randomized design, and multiple sample sizes are  
150 estimated by a previous clinical research review. The main outcome is measured with  
151 the amount of HBL. The overall mean estimate is  $\sigma = 320$ , and the overall standard  
152 deviation is  $\mu = 79$ , both estimated by the statistical formula  
153 
$$n = \frac{z^2 \left( \sum_{i=1}^k \sigma_i^2 / k \right) / \left[ \sum_{i=1}^k (\mu_i - \mu)^2 / (k-1) \right]}{1 - \text{power}}$$
. Considering a dropout rate of 20%, 76 subjects are  
154 required to yield a power of 90% with a significance level of 0.05.

1  
2  
3  
4 155 *Randomization and allocation concealment*

5  
6 156 Patients are randomly assigned to two groups according to at 1:1 ratio; SPSS  
7  
8  
9 157 version 25.0 (IBM Corporation, Armonk, NY) is used to generate a random sequence  
10  
11 158 containing 76 random numbers, which are placed into an opaque envelope and put in  
12  
13  
14 159 a computer by encryption. The group data is saved by the statistician. Only the nurse  
15  
16  
17 160 is allowed to check the enrollment and give the corresponding treatment.

18  
19 161 *Single-blinded design*

20  
21  
22 162 Only the nurse will be allowed to know the patients' enrollment and give them  
23  
24 163 corresponding treatment. The outcome evaluators will objectively record the patients'  
25  
26  
27 164 test results.

28  
29  
30 165 *Eligibility criteria*

31  
32 166 The eligibility criteria are set in accordance with the "AMERICAN  
33  
34 167 RHEUMATISM ASSOCIATION CRITERIA FOR RHEUMATOID ARTHRITIS"  
35  
36  
37 168 from the American Journal of Rheumatism (revised in 1978),<sup>37</sup> and the 2010  
38  
39 169 "ACR/EULAR classification criteria for rheumatoid arthritis"<sup>38</sup> (1)The patient is  
40  
41  
42 170 diagnosed with RA in Stage III or IV according to the Kellgren-Lawrence<sup>39</sup>  
43  
44 171 classification; (2)The patient is 55 to 75 years old; (3)The patient will undergo the  
45  
46  
47 172 unilateral primary TKA; (4)The patients will receive perioperative anti-fibrinolytic  
48  
49 173 TXA therapy; and (5)The patient will show normal blood-clotting function and no  
50  
51  
52 174 preoperative anaemia.

53  
54  
55 175 *Exclusion criteria*

56  
57  
58 176 Excluded are those with: (1)Other types of arthritis (such as primary arthritis,  
59  
60

1  
2  
3  
4 177 post-traumatic osteoarthritis, gouty osteoarthritis, haemophilic osteoarthritis, and  
5  
6 178 tuberculous arthritis); (2)Bilateral knee arthroplasty (RA patients); (3)Severe  
7  
8  
9 179 cardiovascular disease (such as myocardial infarction, atrial fibrillation, angina  
10  
11 180 pectoris, and heart failure) or cerebrovascular disease (cerebral infarction and cerebral  
12  
13  
14 181 haemorrhage);and (4)Prolonged use of oral anticoagulant drugs (such as aspirin,  
15  
16  
17 182 warfarin, and clopidogrel).

18  
19  
20 183 *Elimination criteria*

21  
22 184 Eliminated are those with: (1)Acquired colour vision disorder; (2)Active  
23  
24 185 intravascular coagulation patients; and (3)a history of convulsions.

25  
26  
27 186 *Termination criteria*

28  
29  
30 187 The study on one patient will be terminated if he/she shows the following  
31  
32 188 events: (1)Shock; (2)Allergic symptoms, such as itching and a rash; (3)Digestive  
33  
34 189 disorders, such as nausea, vomiting, loss of appetite, and diarrhoea after medication;  
35  
36  
37 190 (4)Reactive dermatitis, dizziness, hypotension, drowsiness, headache; convulsions,  
38  
39  
40 191 visual impairment, and others; and (5)Adverse events, such as intracranial thrombosis  
41  
42  
43 192 and intracranial haemorrhage after medication.

44  
45 193 *Perioperative anti-rheumatic treatment*

46  
47  
48 194 Methotrexate and hydroxychloroquine will be used during the perioperative  
49  
50 195 period. Leflunomide will be discontinued at one week before surgery. Use of other  
51  
52 196 disease-modifying antirheumatic drugs (DMARDs) will be discontinued two days  
53  
54  
55 197 before surgery, and restarted at 1-2 days after gastrointestinal function recovery. The  
56  
57  
58 198 use of newer biologic agents targeting tumor necrosis (TNF- $\alpha$ ) will be discontinued  
59  
60

1  
2  
3  
4 199 for 4 to 5 half-lives before surgery and restarted after wound healing and infection  
5  
6 200 elimination.<sup>40-41</sup>  
7  
8

9 201 *Surgery and anesthesia*  
10

11 202 Surgery will be performed by two senior surgeons (LBX and WTZ). The  
12  
13 203 operations will be conducted under general anaesthesia. A median incision (14-17 cm  
14  
15 204 long) is cut in the knee joint with a medial paramedian support band. Internal  
16  
17 205 positioning is used for femoral bone marrow and external positioning for tibial bone  
18  
19 206 marrow. All patients will use a tourniquet with a pressure of 230-250 mmHg. During  
20  
21 207 the operation, blood pressure will be reduced to 20% of the basal level through a  
22  
23 208 suction drainage tube, and limb surgery will be conducted with an elastic bandage.  
24  
25 209 During the operation, conventional anti-infective, combined analgesic,  
26  
27 210 anti-inflammatory, and anti-coagulation treatment and other symptomatic treatments  
28  
29 211 will be administered according to the "Chinese Hip and Total Knee Arthroplasty  
30  
31 212 Surgery Perioperative Anti-fibrinolytic Drug Sequential Anticoagulant Application  
32  
33 213 Programme Expert Consensus". Ten minutes before the incision, 1 g of TXA + 100  
34  
35 214 mL of intravenous-saline and 1.5 g of TXA + 50 mL articular-injection saline will be  
36  
37 215 administered preoperatively in the sutured joint cavity.  
38  
39  
40  
41  
42  
43  
44  
45  
46

47 216 TXA is produced by Hunan Dongting Pharmaceutical Co., Ltd., and used  
48  
49 217 according to the second edition of 2015 Chinese Pharmacopoeia and Drug  
50  
51 218 Supplement Application Approval (2013B02016), YBH07372010; the approval  
52  
53 219 number is National Drug Standard H43020565.  
54  
55  
56  
57

58 220 *Intraoperative blood loss*  
59  
60

1  
2  
3  
4 221 The amount of postoperative blood loss= the total volume of fluid in the  
5  
6 222 negative pressure drain—the volume of normal saline.

7  
8  
9 223 *Study interventions*

10  
11 224 Group A: 1 g of TXA + 100 mL of physiological saline will be injected  
12  
13  
14 225 intravenously at the 3<sup>rd</sup> hour after the operation. Group B: 1 g of TX + 100 mL of  
15  
16  
17 226 physiological saline is intravenously instilled at the 3<sup>rd</sup>, 6<sup>th</sup>, and 12<sup>th</sup> hours after the  
18  
19  
20 227 operation.

21 228 *Pain management and rehabilitation*

22  
23  
24 229 A cocktail injection will be given during the operation, and 0.2 g of oral  
25  
26  
27 230 celecoxib after surgery for analgesia. After anaesthesia the maximum angles of  
28  
29  
30 231 flexion and extension of the ankle will be maintained for 6 seconds, and the foot is  
31  
32  
33 232 relaxed for 5 seconds; the quadriceps contractions are equal between the two sides. At  
34  
35  
36 233 the first postoperative day, the patients will exercise straight-leg-raise,  
37  
38 234 supine-knee-flexion and knee flexion and extension in sitting; the machine-assisted  
39  
40 235 exercises will begin on the third day after surgery, such as continuous passive motion.

41 236 *Antibiotics*

42  
43  
44 237 For perioperative prophylaxis, cefazolin sodium antibiotics are administered at  
45  
46 238 30 minutes before surgery, and 24-48 hours after surgery.

47  
48  
49 239 *Prevention of lower extremity venous thrombosis*

50  
51  
52 240 Six hours after the surgery, perioperative enoxaparin sodium (60mg, once a day  
53  
54 241 for 14 days) is injected for preventing deep vein thrombosis.

55  
56  
57 242 *The Patient and Public Involvement*

58  
59 243 Any non-investigator will not be involved in the design of the study and  
60

1  
2  
3  
4 244 related questions. Patients will receive written information about this trial, pertaining  
5  
6 245 to the benefits, risks and discomforts that they may get from the study. Patients can  
7  
8  
9 246 also discuss with their relatives, friends, or doctors to help them make a decision.  
10  
11 247 Besides, the benefits and risks of the intervention will be assessed by patients  
12  
13  
14 248 themselves. After signing an informed consent, they will be assessed for eligibility  
15  
16  
17 249 and data will be collected. Dissemination of the general results (no personal data) will  
18  
19  
20 250 be made on demand.

21  
22 251

## 23 252 *Outcomes*

### 24 253 *Primary outcomes*

#### 25 254 *Hidden blood loss (HBL), haemoglobin level*

26 255 HBL is calculated according to the formula by Nadle<sup>42</sup> and Gross formula:<sup>43</sup>

27 256 Patient's blood volume (PBV)=  $K_1 \times \text{height(m)} + K_2 \times \text{weight(kg)} +$

28 257  $K_3$  (Male:  $K_1=0.3669, K_2=0.03219, K_3=0.6041$ . Female:  $K_1=0.3561, K_2=0.03308,$

29 258  $K_3=0.1833$ ).  $\text{HBL} = \text{PBV} \times (\text{Hct}_{\text{pre}} - \text{Hct}_{\text{post}}) / \text{Hct}_{\text{ave}}$ .

30 259 Preoperatively, at the 1<sup>st</sup>, 3<sup>rd</sup>, 7<sup>th</sup> and 14<sup>th</sup> days after surgery, we will calculate the

31 260 HBL based on the value of haematocrit and recorded the count of haemoglobin.

### 32 261 *Secondary outcomes*

#### 33 262 *Inflammatory index, inflammatory factor and coagulation index*

34 263 Preoperatively, at the 1<sup>st</sup>, 3<sup>rd</sup>, 7<sup>th</sup> and 14<sup>th</sup> days after surgery, we will record the

35 264 erythrocyte sedimentation rate (ESR) and C-reactive protein (CRP) in the whole

36 265 blood and interleukin 6 (IL-6), interleukin 12 (IL-12), and TNF- $\alpha$  in the plasma.



1  
2  
3  
4 266 Whole blood test indicators and plasma inflammatory factors will be assessed in  
5  
6 267 the Department of Clinical Laboratory of Guanghua Hospital. The indicators and  
7  
8  
9 268 factors will be tested by an inspector who is not involved in this clinical trial.  
10

11  
12 269 *Knee function and swelling*  
13

14 270 Knee function will be measured using the American Keen Society Score (AKSS)  
15  
16  
17 271 at one day before surgery and at the 3<sup>rd</sup>, 7<sup>th</sup> and 14<sup>th</sup> days after surgery. A trained  
18  
19  
20 272 researcher will educate all patients until they fully know how to assess their knee  
21  
22 273 function through the questionnaires. The rate of swelling is defined as the  
23  
24  
25 274 postoperative circumference of the upper tibia ÷ the preoperative circumference of the  
26  
27 275 upper tibia.  
28

29  
30 276 *Adverse events*  
31

32 277 Adverse events include (1)Deep vein thrombosis<sup>44</sup> (acute onset, affected limb  
33  
34  
35 278 swelling, sever pain, or significant tenderness at the femoral triangle or/and leg);  
36  
37  
38 279 (2)Extensive swelling on the affected limb; (3)A dull red colour and a rise in the skin  
39  
40  
41 280 of the affected limb; (4)Generalized shallow venous tension on the affected limb;  
42  
43 281 (5)In the skin of the affected limb; (6)Pulmonary embolism diagnosed by Doppler  
44  
45  
46 282 ultrasound and venography (clinical manifestations: cough, chest tightness,  
47  
48 283 palpitations, haemoptysis, shortness of breath, dizziness, shock, cyanosis, increased  
49  
50  
51 284 respiratory rate, arteriovenous filling or pulsation, etc.) and pulmonary embolism  
52  
53 285 diagnosed by CT.  
54

55  
56 286 The wound healing process and complications<sup>45</sup> (wound bleeding, haematoma,  
57  
58 287 wound infection, and deep infection) will be observed and recorded in the patient's  
59  
60

1  
2  
3  
4 288 case report forms (CRFs) during hospitalization and follow-ups. Wound exudation is  
5  
6 289 defined as the presence of exudation from the wound even 48 hours after surgery.  
7  
8

9 290 *Adverse event treatment*

10  
11 291 Adverse events during the follow-up will be recorded in the CRFs, and their  
12  
13 292 relevance to drug use will be evaluated. All the adverse events will be classified in  
14  
15 293 accordance with the five-level scoring systems (5.0) of the CTCAE.  
16  
17

18 294 Serious adverse events are defined as those that may cause cancer, defects,  
19  
20 295 teratogenicity, death, and permanent damage to organ function, permanent or  
21  
22 296 significant disability, and prolonged hospital stay. In any event, the researcher should  
23  
24 297 immediately take appropriate measures and report it to the hospital and ethics  
25  
26 298 committees within 24 hours.  
27  
28

29 299 *Data management*

30  
31 300 Data on the CRFs will be put in the computer by two independent trained  
32  
33 301 research assistants with a double-entry method. The hospital's independent  
34  
35 302 investigators will check the data periodically.  
36  
37

38 303 *Statistical analysis*

39  
40 304 The analyses are as follows: (1)Descriptive analysis on the characteristics of the  
41  
42 305 study participants; (2)Balance analysis on the baseline values in groups;  
43  
44 306 (3)Comparison of the balance between groups of primary outcomes; and  
45  
46 307 (4)Comparison of secondary outcomes and safety between groups.  
47  
48  
49

50  
51 308 The total rate of adverse events of the two groups are tested by bidirectional  
52  
53 309 disordered R\*C list chi-square test. The association between the incidence of adverse  
54  
55 310 events and the dose of TXA used is described.  
56  
57

58 311 *Ethics and dissemination*  
59  
60

1  
2  
3  
4 312 This clinical trial has been approved by the ethics committee of Shanghai  
5  
6 313 Guanghua Hospital of Integrated Traditional Chinese and Western Medicine. The data  
7  
8  
9 314 sets can be obtained from appropriate authors upon reasonable request. Data will be  
10  
11  
12 315 kept strictly confidential and published on the website of the China Clinical Trials  
13  
14 316 Registry and in peer-reviewed journals.

## 17 317 **Discussion**

18  
19  
20  
21 318 Controlling blood loss can facilitate the recovery from TKA surgery. Previous  
22  
23 319 clinical studies have shown that high dose of TXA can reduce blood loss after TKA in  
24  
25  
26 320 patients with osteoarthritis.<sup>25,45-46</sup> In this trial, we will exclude patients with a large  
27  
28 321 number of intravenous infusions to eliminate the effect of blood dilution on the results.  
29  
30  
31 322 We will use a tourniquet to minimize the blood loss during the operation. Therefore,  
32  
33 323 what we will observed is the blood loss after the removal of tourniquet.<sup>10</sup> It has been  
34  
35  
36 324 reported that intravenous infusion combined with intra-articular injection of TXA may  
37  
38  
39 325 be the optimal bleeding-control scheme.<sup>47-48</sup> Previous studies have shown that knee  
40  
41 326 joint swelling after TKA is associated with HBL in the joint cavity. TXA can reduce  
42  
43  
44 327 postoperative HBL, thereby relieving the swelling around the joint.<sup>49</sup> Given that  
45  
46  
47 328 plasminogen activators play an important role in RA-involved inflammation, the  
48  
49 329 dissolution of fibrin will trigger an inflammatory response.<sup>50</sup> Therefore, we suspect  
50  
51  
52 330 that multiple doses of TXA in the peroperative period may exert an auxiliary  
53  
54  
55 331 anti-inflammatory effect.

56  
57  
58 332 This study will provide new evidence for managing perioperative HBL in TKA  
59  
60

1  
2  
3  
4 333 in Chinese RA patients.  
5  
6

7 334  
8

9 335 **Acknowledgment:**  
10  
11

12  
13 336 The authors thank all the patient advisers for participating in this study.  
14  
15

16  
17 337  
18

19 338  
20

21  
22 339 **References:**  
23

24 340 1 Goyal L, Shah PJ, Yadav RN, *et al.* Anaemia in newly diagnosed patients of  
25  
26 341 rheumatoid arthritis and its correlation with disease activity. *J Assoc Physicians*  
27  
28 342 *India* 2018;66:26–9.  
29

30  
31 343 2 Minichiello E, Semerano L, Boissier MC. Time trends in the incidence,  
32  
33 344 prevalence, and severity of rheumatoid arthritis: A systematic literature review.  
34  
35 345 *Jt Bone Spine* 2016;83:625–30.  
36  
37

38  
39 346 3 Shichikawa K, Inoue K, Hirota S, *et al.* Changes in the incidence and  
40  
41 347 prevalence of rheumatoid arthritis in Kamitonda, Wakayama, Japan, 1965-1996.  
42  
43 348 *Ann Rheum Dis* 1999;58:751–6.  
44

45  
46 349 4 Yan D, Yang J, Pei F. Total knee arthroplasty treatment of rheumatoid arthritis  
47  
48 350 with severe versus moderate flexion contracture. *Journal of orthopaedic*  
49  
50 351 *surgery and research* 2013;8:41.  
51  
52

53  
54 352 5 Louie GH, Ward MM. Changes in the rates of joint surgery among patients  
55  
56 353 with rheumatoid arthritis in California, 1983–2007. *Annals of the rheumatic*  
57  
58  
59  
60

1  
2  
3  
4  
5  
6  
7  
8  
9  
10  
11  
12  
13  
14  
15  
16  
17  
18  
19  
20  
21  
22  
23  
24  
25  
26  
27  
28  
29  
30  
31  
32  
33  
34  
35  
36  
37  
38  
39  
40  
41  
42  
43  
44  
45  
46  
47  
48  
49  
50  
51  
52  
53  
54  
55  
56  
57  
58  
59  
60

- 354 *diseases* 2011;69:868–71.
- 355 6 Ker K, Roberts I. Tranexamic acid for surgical bleeding. *BMJ* 2014;349:10–1.
- 356 7 Freedman J, Luke K, Escobar M, et al. Experience of a network of transfusion  
357 coordinators for blood conservation (Ontario Transfusion Coordinators  
358 [ONTraC]). *Transfusion* 2008;48:237-50.
- 359 8 McCormack PL. Tranexamic Acid: A review of its use in the treatment of  
360 hyperfibrinolysis. *Drugs* 2012;72:585–617.
- 361 9 Padjen I, Öhler L, Studenic P, et al. Clinical meaning and implications of serum  
362 hemoglobin levels in patients with rheumatoid arthritis. *Semin Arthritis Rheum*  
363 2017;47:193–8.
- 364 10 Sehat KR, Evans R, Newman JH. How much blood is really lost in total knee  
365 arthroplasty? Correct blood loss management should take hidden loss into  
366 account. *The Knee* 2000;7:151–5.
- 367 11 Tarwala R, Dorr LD, Gilbert PK, et al. Tourniquet use during cementation only  
368 during total knee arthroplasty: A randomized trial knee. *Clin Orthop Relat Res*  
369 2014;472:169–74.
- 370 12 Hsu KL, Chang CW, Yang CY, et al. Tourniquet Use in Total Knee  
371 Arthroplasty. *Prim Total Knee Arthroplast* Published Online First:2018.
- 372 13 Schnettler T, Papillon N, Rees H. Use of a Tourniquet in Total Knee  
373 Arthroplasty Causes a Paradoxical Increase in Total Blood Loss. *J Bone Jt*  
374 *Surg - Am Vol* 2017;99:1331–6.
- 375 14 Aglietti P, Baldini A, Vena LM, et al. Effect of tourniquet use on activation of

- 1  
2  
3  
4 376 coagulation in total knee replacement. *Clin Orthop Relat Res*  
5  
6 377 2000;371:169–77.  
7  
8  
9 378 15 Benoni G, Lethagen S, Fredin H. The effect of tranexamic acid on local and  
10  
11 379 plasma fibrinolysis during total knee arthroplasty. *Thromb Res*  
12  
13 380 1997;85:195–206.  
14  
15  
16  
17 381 16 Jennings JD, Solarz MK, Haydel C. Application of Tranexamic Acid in Trauma  
18  
19 382 and Orthopedic Surgery. *Orthop Clin North Am* 2016;47:137–43.  
20  
21  
22 383 17 Napolitano LM, Cohen MJ, Cotton BA, *et al.* Tranexamic acid in trauma. *J*  
23  
24 384 *Trauma Acute Care Surg* 2013;74:1575–86.  
25  
26  
27 385 18 Shakur H, Roberts I, Bautista R, *et al.* CRASH-2 trial collaborators. Effects of  
28  
29 386 tranexamic acid on death, vascular occlusive events, and blood transfusion in  
30  
31 387 trauma patients with significant haemorrhage (CRASH-2): a randomised,  
32  
33 388 placebo-controlled trial. *Lancet* 2010;376:23-32.  
34  
35  
36  
37 389 19 Adravanti P, Di Salvo E, Calafiore G, *et al.* A prospective, randomized,  
38  
39 390 comparative study of intravenous alone and combined intravenous and  
40  
41 391 intraarticular administration of tranexamic acid in primary total knee  
42  
43 392 replacement. *Arthroplast Today* 2018;4:85–8.  
44  
45  
46  
47  
48 393 20 Prakash J, Seon JK, Park YJ, *et al.* A randomized control trial to evaluate the  
49  
50 394 effectiveness of intravenous, intraarticular and topical wash regimes of  
51  
52 395 tranexamic acid in primary total knee arthroplasty. *J Orthop Surg* 2017;25:1–7.  
53  
54  
55  
56 396 21 Mao Z, Yue B, Wang Y, *et al.* A comparative, retrospective study of  
57  
58 397 peri-articular and intra-articular injection of tranexamic acid for the  
59  
60

- 1  
2  
3  
4 398 management of postoperative blood loss after total knee arthroplasty. *BMC*  
5  
6 399 *Musculoskelet Disord* 2016;17:1–8.  
7  
8  
9 400 22 Jansen JA, Lameijer JRC, Snoeker BAM. Combined intravenous, topical and  
10  
11 401 oral tranexamic acid administration in total knee replacement: Evaluation of  
12  
13 402 safety in patients with previous thromboembolism and effect on hemoglobin  
14  
15 403 level and transfusion rate. *The Knee* 2017;24:1206–12.  
16  
17  
18  
19 404 23 Lei Y, Xie J, Xu B, *et al.* The efficacy and safety of multiple-dose intravenous  
20  
21 405 tranexamic acid on blood loss following total knee arthroplasty: a randomized  
22  
23 406 controlled trial. *Int Orthop* 2017;41:2053–9.  
24  
25  
26  
27 407 24 Zhen Y, Zongke Z, Fuxing P, *et al.* An expert consensus on the application of  
28  
29 408 an anti-fibrinolytic anticoagulant drug during the perioperative period  
30  
31 409 following hip and knee joint replacement in China. *Chinese Journal of Bone*  
32  
33 410 *and Joint Surgery. Chinese Journal of Bone and Joint Surgery.*2015;8:281–5.  
34  
35  
36  
37 411 25 Xie J, Hu Q, Huang Z, *et al.* Comparison of three routes of administration of  
38  
39 412 tranexamic acid in primary unilateral total knee arthroplasty: Analysis of a  
40  
41 413 national database. *Thromb Res* 2019;173:96–101.  
42  
43  
44  
45 414 26 Hu WH. Efficacy of intravenous versus topical administration of tranexamic  
46  
47 415 acid in primary total knee arthroplasty. *Chinese J Tissue Eng Res*  
48  
49 416 2018;22:356–61.  
50  
51  
52  
53 417 27 Yue C, Kang P, Yang P, *et al.* Topical application of tranexamic acid in  
54  
55 418 primary total hip arthroplasty: A randomized double-blind controlled trial. *J*  
56  
57 419 *Arthroplasty* 2014;29:2452–6.  
58  
59  
60

- 1  
2  
3  
4 420 28 Liu W, Yang C, Huang X, *et al.* Tranexamic Acid Reduces Occult Blood Loss,  
5  
6 421 Blood Transfusion, and Improves Recovery of Knee Function after Total Knee  
7  
8 422 Arthroplasty: A Comparative Study. *J Knee Surg* 2018;31:239–46.  
9  
10  
11 423 29 Yang Y, Lv YM, Ding PJ, *et al.* The reduction in blood loss with intra-articular  
12  
13 424 injection of tranexamic acid in unilateral total knee arthroplasty without  
14  
15 425 operative drains: A randomized controlled trial. *Eur J Orthop Surg Traumatol*  
16  
17 426 2015;25:135–9.  
18  
19  
20 427 30 Young B, Moondi P. A questionnaire-based survey investigating the current use  
21  
22 428 of tranexamic acid in traumatic haemorrhage and elective hip and knee  
23  
24 429 arthroplasty. *JRSM Open* 2014;5:204253331351694.  
25  
26  
27 430 31 Cid J, Lozano M. Tranexamic acid reduces allogeneic red cell transfusions in  
28  
29 431 patients undergoing total knee arthroplasty: Results of a meta-analysis of  
30  
31 432 randomized controlled trials. *Transfusion* 2005;45:1302–7.  
32  
33  
34 433 32 Blanié A, Bellamy L, Rhayem Y, *et al.* Duration of postoperative fibrinolysis  
35  
36 434 after total hip or knee replacement: A laboratory follow-up study. *Thromb Res*  
37  
38 435 2013;131:e6–11.  
39  
40  
41 436 33 Hunt BJ. The current place of tranexamic acid in the management of bleeding.  
42  
43 437 *Anaesthesia* 2015;70:e18-53.  
44  
45  
46 438 34 Qiang P, Hong W, Xuan-ming LI, *et al.* Effects of High Doses of Tranexamic  
47  
48 439 Acid on the Fibrinolytic Activity and Inflammatory Response of Patients  
49  
50 440 undergoing Total Knee Arthroplasty \*. 2018;18:3319–22.  
51  
52  
53 441 35 Demos HA, Lin ZX, Barfield WR, *et al.* Process Improvement Project Using  
54  
55  
56  
57  
58  
59  
60



- 1  
2  
3  
4 442 Tranexamic Acid Is Cost-Effective in Reducing Blood Loss and Transfusions  
5  
6 443 After Total Hip and Total Knee Arthroplasty. *J Arthroplasty* 2017;32:2375–80.  
7  
8  
9 444 36 Tang Y, Wen Y, Li W, *et al.* The efficacy and safety of multiple doses of oral  
10  
11 445 tranexamic acid on blood loss, inflammatory and fibrinolysis response  
12  
13 446 following total knee arthroplasty: A randomized controlled trial. *Int J Surg*  
14  
15 447 2019;65:45–51.  
16  
17  
18  
19 448 37 SILMAN, A J . THE 1987 REVISED AMERICAN RHEUMATISM  
20  
21 449 ASSOCIATION CRITERIA FOR RHEUMATOID ARTHRITIS.  
22  
23 450 *Rheumatology* 1988;27:341–3.  
24  
25  
26  
27 451 38 Britsemmer K, Ursum J, Gerritsen M, *et al.* Validation of the 2010  
28  
29 452 ACR/EULAR classification criteria for rheumatoid arthritis: Slight  
30  
31 453 improvement over the 1987 ACR criteria. *Ann Rheum Dis* 2011;70:1468–70.  
32  
33  
34  
35 454 39 Kohn MD, Sassoon AA, Fernando ND. Classifications in Brief:  
36  
37 455 Kellgren-Lawrence Classification of Osteoarthritis. *Clin Orthop Relat Res*  
38  
39 456 2016;474:1886–93.  
40  
41  
42  
43 457 40 Krause ML, Matteson EL. Perioperative management of the patient with  
44  
45 458 rheumatoid arthritis. *World J Orthop* 2014;5:283–91.  
46  
47  
48 459 41 Thorsness RJ, Hammert WC. Perioperative management of rheumatoid  
49  
50 460 medications. *J Hand Surg Am* 2012;37:1928–31.  
51  
52  
53 461 42 Nadler S B, Hidalgo J H, Bloch T. Prediction of blood volume in normal human  
54  
55 462 adults. *Surgery* 1962;51:224–32.  
56  
57  
58 463 43 J B Gross. Estimating allowable blood loss: Corrected for dilution.  
59  
60

- 1  
2  
3  
4 464 *Anesthesiology* 1983;58:277-280.
- 5  
6 465 44 Lee JT. Commentary on the “Guideline for Prevention of Surgical Site  
7  
8  
9 466 Infection, 1999”. *American Journal of Infection Control* 1999;27:96.
- 10  
11 467 45 Park JH, Choi SW, Shin EH, *et al.* The optimal protocol to reduce blood loss  
12  
13  
14 468 and blood transfusion after unilateral total knee replacement: Low-dose  
15  
16  
17 469 IA-TXA plus 30-min drain clamping versus drainage clamping for the first 3 h  
18  
19  
20 470 without IA-TXA. *J Orthop Surg* 2017;25:1–7.
- 21  
22 471 46 Voorn VM, Marang-van de Mheen PJ, van der Hout A, *et al.* The effectiveness  
23  
24  
25 472 of a de-implementation strategy to reduce low-value blood management  
26  
27  
28 473 techniques in primary hip and knee arthroplasty: a pragmatic  
29  
30  
31 474 cluster-randomized controlled trial. *Implement Science* 2017;12:72.
- 32  
33 475 47 Mi B, Liu G, Lv H, *et al.* Is combined use of intravenous and intraarticular  
34  
35  
36 476 tranexamic acid superior to intravenous or intraarticular tranexamic acid alone  
37  
38  
39 477 in total knee arthroplasty? A meta-analysis of randomized controlled trials. *J*  
40  
41  
42 478 *Orthop Surg Res* 2017;12:1–9.
- 43  
44 479 48 Iseki T, Tsukada S, Wakui M, *et al.* Intravenous tranexamic acid only versus  
45  
46  
47 480 combined intravenous and intra-articular tranexamic acid for perioperative  
48  
49  
50 481 blood loss in patients undergoing total knee arthroplasty. *Eur J Orthop Surg*  
51  
52  
53 482 *Traumatol* 2018;28:1397–402.
- 54  
55 483 49 Ishida K, Tsumura N, Kitagawa A, *et al.* Intra-articular injection of tranexamic  
56  
57  
58 484 acid reduces not only blood loss but also knee joint swelling after total knee  
59  
60 485 arthroplasty. *Int Orthop* 2011;35:1639–45.

1  
2  
3  
4 486 50 Li J, Ny A, Leonardsson G, *et al*. The plasminogen activator/plasmin system is  
5  
6 487 essential for development of the joint inflammatory phase of collagen type  
7  
8  
9 488 II-induced arthritis. *Am J Pathol* 2005;166:783–92.  
10

11  
12 489

13  
14 **Table 1** Enhanced recovery after surgery blood management

15  
16 Preoperative

17  
18 1 Treatment of hemorrhagic primary disease

19  
20 2 Nutritional guidance, balanced diet

21  
22 3 Iron application

23  
24 4 rHuEPO application

25  
26  
27 Intraoperative

28  
29 5 Minimally invasive surgery

30  
31 6 Tourniquet optimization

32  
33 7 Controlled buck

34  
35 8 Autologous blood return

36  
37 9 Use of tranexamic acid

38  
39  
40 Postoperative

41  
42 10 Reduce bleeding (pressure dressing of wounds, prevent stress ulcers)

43  
44 11 Nutritional support, iron supplementation, use of rHuEPO

45  
46 rHuEPO, recombinant human erythropoietin.

47  
48  
49 490

50  
51 491

52  
53 492

54  
55 493

56  
57 494

**Table 2** The schedule of trial enrolment, interventions and assessments

|                                                   | Outcome assessment |    |    |    |     |
|---------------------------------------------------|--------------------|----|----|----|-----|
|                                                   | Pre-OP             | D1 | D3 | D7 | D14 |
| Enrolment                                         | •                  |    |    |    |     |
| Assessment of eligibility                         | •                  |    |    |    |     |
| Randomisation                                     | •                  |    |    |    |     |
| Group A                                           |                    |    |    |    |     |
| Post-OP 1 dose of TXA                             | •                  | •  | •  | •  | •   |
| Group B                                           |                    |    |    |    |     |
| Post-OP 3 doses of TXA                            | •                  | •  | •  | •  | •   |
| HBL                                               |                    | •  | •  | •  | •   |
| haemoglobin level                                 | •                  | •  | •  | •  | •   |
| Inflammatory index                                | •                  | •  | •  | •  | •   |
| inflammatory factor                               | •                  | •  | •  | •  | •   |
| coagulation index                                 | •                  | •  | •  | •  | •   |
| swelling rate                                     |                    | •  | •  | •  | •   |
| DVP                                               |                    | •  | •  | •  | •   |
| PE                                                |                    | •  | •  | •  | •   |
| Postoperative complications<br>and adverse events |                    | •  | •  | •  | •   |

OP, operative; TXA, tranexamic acid; HBL, hidden blood lose; DVP, deep vein thrombosis; PE, pulmonary embolism; D1, the 1<sup>st</sup> day after surgery; D3, the 3<sup>rd</sup> day after surgery; D7, the 7<sup>th</sup> day after surgery; D14, the 14<sup>th</sup> day after surgery.

495

496 Figure 1: The study flow diagram, including participants recruitment, eligibility,  
497 screening, randomisation, allocation concealment and outcome assessments.

498 TXA,tranexamic acid.

1  
2  
3  
4  
5  
6  
7  
8  
9  
10  
11  
12  
13  
14  
15  
16  
17  
18  
19  
20  
21  
22  
23  
24  
25  
26  
27  
28  
29  
30  
31  
32  
33  
34  
35  
36  
37  
38  
39  
40  
41  
42  
43  
44  
45  
46  
47  
48  
49  
50  
51  
52  
53  
54  
55  
56  
57  
58  
59  
60

## Unable to Convert Image

The dimensions of this image (in pixels) are too large to be converted. For this image to convert, the total number of pixels (height x width) must be less than 40,000,000 (40 megapixels).

Figure 1: The study flow diagram, including participants recruitment, eligibility, screening, randomisation, allocation concealment and outcome assessments. TXA, tranexamic acid.

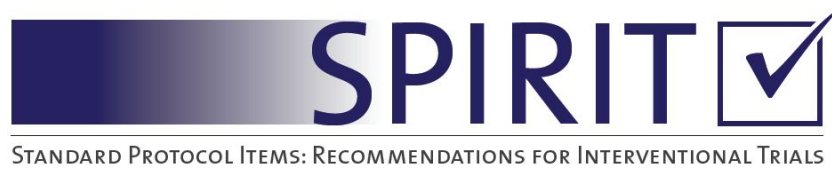

STANDARD PROTOCOL ITEMS: RECOMMENDATIONS FOR INTERVENTIONAL TRIALS

SPIRIT 2013 Checklist: Recommended items to address in a clinical trial protocol and related documents\*

| Section/item                      | Item No | Description                                                                                                                                                                                                                                                                              | Line Number on which item is reported |
|-----------------------------------|---------|------------------------------------------------------------------------------------------------------------------------------------------------------------------------------------------------------------------------------------------------------------------------------------------|---------------------------------------|
| <b>Administrative information</b> |         |                                                                                                                                                                                                                                                                                          |                                       |
| Title                             | 1       | Descriptive title identifying the study design, population, interventions, and, if applicable, trial acronym                                                                                                                                                                             | 1-3                                   |
| Trial registration                | 2a      | Trial identifier and registry name. If not yet registered, name of intended registry                                                                                                                                                                                                     | 1-3                                   |
|                                   | 2b      | All items from the World Health Organization Trial Registration Data Set                                                                                                                                                                                                                 | 71                                    |
| Protocol version                  | 3       | Date and version identifier                                                                                                                                                                                                                                                              |                                       |
| Funding                           | 4       | Sources and types of financial, material, and other support                                                                                                                                                                                                                              | 49                                    |
| Roles and responsibilities        | 5a      | Names, affiliations, and roles of protocol contributors                                                                                                                                                                                                                                  | 7-36;44-47                            |
|                                   | 5b      | Name and contact information for the trial sponsor                                                                                                                                                                                                                                       |                                       |
|                                   | 5c      | Role of study sponsor and funders, if any, in study design; collection, management, analysis, and interpretation of data; writing of the report; and the decision to submit the report for publication, including whether they will have ultimate authority over any of these activities |                                       |
|                                   | 5d      | Composition, roles, and responsibilities of the coordinating centre, steering committee, endpoint adjudication committee, data management team, and other individuals or groups overseeing the trial, if applicable (see Item 21a for data monitoring committee)                         |                                       |
| <b>Introduction</b>               |         |                                                                                                                                                                                                                                                                                          |                                       |

|                                                                      |                                                           |     |                                                                                                                                                                                                                                                                                                                                                                                |                             |
|----------------------------------------------------------------------|-----------------------------------------------------------|-----|--------------------------------------------------------------------------------------------------------------------------------------------------------------------------------------------------------------------------------------------------------------------------------------------------------------------------------------------------------------------------------|-----------------------------|
| 1<br>2<br>3<br>4<br>5<br>6                                           | Background and rationale                                  | 6a  | Description of research question and justification for undertaking the trial, including summary of relevant studies (published and unpublished) examining benefits and harms for each intervention                                                                                                                                                                             | 87-132                      |
| 7<br>8                                                               |                                                           | 6b  | Explanation for choice of comparators                                                                                                                                                                                                                                                                                                                                          |                             |
| 9<br>10                                                              | Objectives                                                | 7   | Specific objectives or hypotheses                                                                                                                                                                                                                                                                                                                                              | 133-135                     |
| 11<br>12<br>13<br>14<br>15<br>16                                     | Trial design                                              | 8   | Description of trial design including type of trial (eg, parallel group, crossover, factorial, single group), allocation ratio, and framework (eg, superiority, equivalence, noninferiority, exploratory)                                                                                                                                                                      | 1-3;<br>79-80.              |
| 17                                                                   | <b>Methods: Participants, interventions, and outcomes</b> |     |                                                                                                                                                                                                                                                                                                                                                                                |                             |
| 18<br>19<br>20<br>21<br>22<br>23<br>24                               | Study setting                                             | 9   | Description of study settings (eg, community clinic, academic hospital) and list of countries where data will be collected. Reference to where list of study sites can be obtained                                                                                                                                                                                             | 68;<br>139-141;<br>248-249. |
| 25<br>26<br>27<br>28<br>29<br>30                                     | Eligibility criteria                                      | 10  | Inclusion and exclusion criteria for participants. If applicable, eligibility criteria for study centres and individuals who will perform the interventions (eg, surgeons, psychotherapists)                                                                                                                                                                                   | 165-182                     |
| 31<br>32<br>33<br>34<br>35                                           | Interventions                                             | 11a | Interventions for each group with sufficient detail to allow replication, including how and when they will be administered                                                                                                                                                                                                                                                     | 223-227                     |
| 36<br>37<br>38<br>39<br>40                                           |                                                           | 11b | Criteria for discontinuing or modifying allocated interventions for a given trial participant (eg, drug dose change in response to harms, participant request, or improving/worsening disease)                                                                                                                                                                                 | 186-192                     |
| 41<br>42<br>43<br>44<br>45                                           |                                                           | 11c | Strategies to improve adherence to intervention protocols, and any procedures for monitoring adherence (eg, drug tablet return, laboratory tests)                                                                                                                                                                                                                              |                             |
| 46<br>47<br>48                                                       |                                                           | 11d | Relevant concomitant care and interventions that are permitted or prohibited during the trial                                                                                                                                                                                                                                                                                  | 228-235                     |
| 49<br>50<br>51<br>52<br>53<br>54<br>55<br>56<br>57<br>58<br>59<br>60 | Outcomes                                                  | 12  | Primary, secondary, and other outcomes, including the specific measurement variable (eg, systolic blood pressure), analysis metric (eg, change from baseline, final value, time to event), method of aggregation (eg, median, proportion), and time point for each outcome. Explanation of the clinical relevance of chosen efficacy and harm outcomes is strongly recommended | 253-275;                    |

|                                                                     |     |                                                                                                                                                                                                                                                                                                                                                          |                         |
|---------------------------------------------------------------------|-----|----------------------------------------------------------------------------------------------------------------------------------------------------------------------------------------------------------------------------------------------------------------------------------------------------------------------------------------------------------|-------------------------|
| Participant timeline                                                | 13  | Time schedule of enrolment, interventions (including any run-ins and washouts), assessments, and visits for participants. A schematic diagram is highly recommended (see Figure)                                                                                                                                                                         | 259;263;271 and Figure1 |
| Sample size                                                         | 14  | Estimated number of participants needed to achieve study objectives and how it was determined, including clinical and statistical assumptions supporting any sample size calculations                                                                                                                                                                    | 146-154                 |
| Recruitment                                                         | 15  | Strategies for achieving adequate participant enrolment to reach target sample size                                                                                                                                                                                                                                                                      | 141                     |
| <b>Methods: Assignment of interventions (for controlled trials)</b> |     |                                                                                                                                                                                                                                                                                                                                                          |                         |
| Allocation:                                                         |     |                                                                                                                                                                                                                                                                                                                                                          |                         |
| Sequence generation                                                 | 16a | Method of generating the allocation sequence (eg, computer-generated random numbers), and list of any factors for stratification. To reduce predictability of a random sequence, details of any planned restriction (eg, blocking) should be provided in a separate document that is unavailable to those who enrol participants or assign interventions | 155-160                 |
| Allocation concealment mechanism                                    | 16b | Mechanism of implementing the allocation sequence (eg, central telephone; sequentially numbered, opaque, sealed envelopes), describing any steps to conceal the sequence until interventions are assigned                                                                                                                                                | 155-160                 |
| Implementation                                                      | 16c | Who will generate the allocation sequence, who will enrol participants, and who will assign participants to interventions                                                                                                                                                                                                                                | 142-145                 |
| Blinding (masking)                                                  | 17a | Who will be blinded after assignment to interventions (eg, trial participants, care providers, outcome assessors, data analysts), and how                                                                                                                                                                                                                | 159-164                 |
|                                                                     | 17b | If blinded, circumstances under which unblinding is permissible, and procedure for revealing a participant's allocated intervention during the trial                                                                                                                                                                                                     |                         |
| <b>Methods: Data collection, management, and analysis</b>           |     |                                                                                                                                                                                                                                                                                                                                                          |                         |



|                                                          |                            |     |                                                                                                                                                                                                                                                                                                                                                                                                              |                     |
|----------------------------------------------------------|----------------------------|-----|--------------------------------------------------------------------------------------------------------------------------------------------------------------------------------------------------------------------------------------------------------------------------------------------------------------------------------------------------------------------------------------------------------------|---------------------|
| 1<br>2<br>3<br>4<br>5<br>6<br>7<br>8<br>9<br>10<br>11    | Data collection methods    | 18a | Plans for assessment and collection of outcome, baseline, and other trial data, including any related processes to promote data quality (eg, duplicate measurements, training of assessors) and a description of study instruments (eg, questionnaires, laboratory tests) along with their reliability and validity, if known. Reference to where data collection forms can be found, if not in the protocol | 159-160;            |
| 12<br>13<br>14<br>15<br>16<br>17                         |                            | 18b | Plans to promote participant retention and complete follow-up, including list of any outcome data to be collected for participants who discontinue or deviate from intervention protocols                                                                                                                                                                                                                    | 286-288;<br>290-298 |
| 18<br>19<br>20<br>21<br>22<br>23<br>24<br>25             | Data management            | 19  | Plans for data entry, coding, security, and storage, including any related processes to promote data quality (eg, double data entry; range checks for data values). Reference to where details of data management procedures can be found, if not in the protocol                                                                                                                                            | 300-302             |
| 26<br>27<br>28<br>29<br>30<br>31                         | Statistical methods        | 20a | Statistical methods for analysing primary and secondary outcomes. Reference to where other details of the statistical analysis plan can be found, if not in the protocol                                                                                                                                                                                                                                     | 303-310             |
| 32<br>33<br>34                                           |                            | 20b | Methods for any additional analyses (eg, subgroup and adjusted analyses)                                                                                                                                                                                                                                                                                                                                     |                     |
| 35<br>36<br>37<br>38<br>39<br>40                         |                            | 20c | Definition of analysis population relating to protocol non-adherence (eg, as randomised analysis), and any statistical methods to handle missing data (eg, multiple imputation)                                                                                                                                                                                                                              |                     |
| 41<br>42                                                 | <b>Methods: Monitoring</b> |     |                                                                                                                                                                                                                                                                                                                                                                                                              |                     |
| 43<br>44<br>45<br>46<br>47<br>48<br>49<br>50<br>51<br>52 | Data monitoring            | 21a | Composition of data monitoring committee (DMC); summary of its role and reporting structure; statement of whether it is independent from the sponsor and competing interests; and reference to where further details about its charter can be found, if not in the protocol. Alternatively, an explanation of why a DMC is not needed                                                                        | 53-55               |
| 53<br>54<br>55<br>56<br>57<br>58<br>59<br>60             |                            | 21b | Description of any interim analyses and stopping guidelines, including who will have access to these interim results and make the final decision to terminate the trial                                                                                                                                                                                                                                      | 185-191             |

|                                 |     |                                                                                                                                                                                                                                                                                     |                     |
|---------------------------------|-----|-------------------------------------------------------------------------------------------------------------------------------------------------------------------------------------------------------------------------------------------------------------------------------------|---------------------|
| Harms                           | 22  | Plans for collecting, assessing, reporting, and managing solicited and spontaneously reported adverse events and other unintended effects of trial interventions or trial conduct                                                                                                   | 186-192;<br>276-289 |
| Auditing                        | 23  | Frequency and procedures for auditing trial conduct, if any, and whether the process will be independent from investigators and the sponsor                                                                                                                                         |                     |
| <b>Ethics and dissemination</b> |     |                                                                                                                                                                                                                                                                                     |                     |
| Research ethics approval        | 24  | Plans for seeking research ethics committee/institutional review board (REC/IRB) approval                                                                                                                                                                                           | 68-71               |
| Protocol amendments             | 25  | Plans for communicating important protocol modifications (eg, changes to eligibility criteria, outcomes, analyses) to relevant parties (eg, investigators, REC/IRBs, trial participants, trial registries, journals, regulators)                                                    | 142-143<br>162-164  |
| Consent or assent               | 26a | Who will obtain informed consent or assent from potential trial participants or authorised surrogates, and how (see Item 32)                                                                                                                                                        | 244-249             |
|                                 | 26b | Additional consent provisions for collection and use of participant data and biological specimens in ancillary studies, if applicable                                                                                                                                               | 242-247             |
| Confidentiality                 | 27  | How personal information about potential and enrolled participants will be collected, shared, and maintained in order to protect confidentiality before, during, and after the trial                                                                                                | 249-250             |
| Declaration of interests        | 28  | Financial and other competing interests for principal investigators for the overall trial and each study site                                                                                                                                                                       | 49-54               |
| Access to data                  | 29  | Statement of who will have access to the final trial dataset, and disclosure of contractual agreements that limit such access for investigators                                                                                                                                     | 246-249<br>313-316; |
| Ancillary and post-trial care   | 30  | Provisions, if any, for ancillary and post-trial care, and for compensation to those who suffer harm from trial participation                                                                                                                                                       |                     |
| Dissemination policy            | 31a | Plans for investigators and sponsor to communicate trial results to participants, healthcare professionals, the public, and other relevant groups (eg, via publication, reporting in results databases, or other data sharing arrangements), including any publication restrictions | 313-316             |

|                            |     |                                                                                                                                                                                                |         |
|----------------------------|-----|------------------------------------------------------------------------------------------------------------------------------------------------------------------------------------------------|---------|
|                            | 31b | Authorship eligibility guidelines and any intended use of professional writers                                                                                                                 | 332-333 |
|                            | 31c | Plans, if any, for granting public access to the full protocol, participant-level dataset, and statistical code                                                                                |         |
| <b>Appendices</b>          |     |                                                                                                                                                                                                |         |
| Informed consent materials | 32  | Model consent form and other related documentation given to participants and authorised surrogates                                                                                             | 244-248 |
| Biological specimens       | 33  | Plans for collection, laboratory evaluation, and storage of biological specimens for genetic or molecular analysis in the current trial and for future use in ancillary studies, if applicable | 262-268 |

\*It is strongly recommended that this checklist be read in conjunction with the SPIRIT 2013 Explanation & Elaboration for important clarification on the items. Amendments to the protocol should be tracked and dated. The SPIRIT checklist is copyrighted by the SPIRIT Group under the Creative Commons "[Attribution-NonCommercial-NoDerivs 3.0 Unported](https://creativecommons.org/licenses/by-nc-nd/3.0/)" license.

# BMJ Open

## The protocol of a single-blinded, randomized, parallel-controlled study to evaluate the effects of multiple-dose of tranexamic acid on perioperative blood loss in total knee arthroplasty in patients with rheumatoid arthritis

|                                 |                                                                                                                                                                                                                                                                                                                                                                                                                                                                                                                                                                                                                                                                                                                                                                                                                                                                                                                                                                                                                                                                                                                                                                                                                                                                                                                                                                                                                                                                                                                                                                                                                                                                                                                                                                  |
|---------------------------------|------------------------------------------------------------------------------------------------------------------------------------------------------------------------------------------------------------------------------------------------------------------------------------------------------------------------------------------------------------------------------------------------------------------------------------------------------------------------------------------------------------------------------------------------------------------------------------------------------------------------------------------------------------------------------------------------------------------------------------------------------------------------------------------------------------------------------------------------------------------------------------------------------------------------------------------------------------------------------------------------------------------------------------------------------------------------------------------------------------------------------------------------------------------------------------------------------------------------------------------------------------------------------------------------------------------------------------------------------------------------------------------------------------------------------------------------------------------------------------------------------------------------------------------------------------------------------------------------------------------------------------------------------------------------------------------------------------------------------------------------------------------|
| Journal:                        | <i>BMJ Open</i>                                                                                                                                                                                                                                                                                                                                                                                                                                                                                                                                                                                                                                                                                                                                                                                                                                                                                                                                                                                                                                                                                                                                                                                                                                                                                                                                                                                                                                                                                                                                                                                                                                                                                                                                                  |
| Manuscript ID                   | bmjopen-2019-034431.R2                                                                                                                                                                                                                                                                                                                                                                                                                                                                                                                                                                                                                                                                                                                                                                                                                                                                                                                                                                                                                                                                                                                                                                                                                                                                                                                                                                                                                                                                                                                                                                                                                                                                                                                                           |
| Article Type:                   | Protocol                                                                                                                                                                                                                                                                                                                                                                                                                                                                                                                                                                                                                                                                                                                                                                                                                                                                                                                                                                                                                                                                                                                                                                                                                                                                                                                                                                                                                                                                                                                                                                                                                                                                                                                                                         |
| Date Submitted by the Author:   | 17-Feb-2020                                                                                                                                                                                                                                                                                                                                                                                                                                                                                                                                                                                                                                                                                                                                                                                                                                                                                                                                                                                                                                                                                                                                                                                                                                                                                                                                                                                                                                                                                                                                                                                                                                                                                                                                                      |
| Complete List of Authors:       | <p>Kang, Bing-xin; Guanghua Hospital of Integrated Traditional Chinese Medicine and Western Medicine, Shanghai University of Traditional Chinese Medicine, Orthopaedics</p> <p>Xu, Hui; Guanghua Hospital of Integrated Traditional Chinese Medicine and Western Medicine, Shanghai University of Traditional Chinese Medicine, Orthopaedics</p> <p>Gao, Chen-xin; Guanghua Hospital of Integrated Traditional Chinese Medicine and Western Medicine, Shanghai University of Traditional Chinese Medicine, Orthopaedics</p> <p>Zhong, Sheng; Guanghua Hospital of Integrated Traditional Chinese Medicine and Western Medicine, Shanghai University of Traditional Chinese Medicine, Orthopaedics</p> <p>Zhang, Jing; Guanghua Hospital of Integrated Traditional Chinese Medicine and Western Medicine, Shanghai University of Traditional Chinese Medicine, Orthopaedics</p> <p>Xie, Jun; Guanghua Hospital of Integrated Traditional Chinese Medicine and Western Medicine, Shanghai University of Traditional Chinese Medicine, Orthopaedics</p> <p>Sun, Song-tao ; Guanghua Hospital of Integrated Traditional Chinese Medicine and Western Medicine, Shanghai University of Traditional Chinese Medicine, Orthopaedics</p> <p>Ma, Ying-hui; Guanghua Hospital of Integrated Traditional Chinese Medicine and Western Medicine, Shanghai University of Traditional Chinese Medicine, Orthopaedics</p> <p>Zhai, Wei-tao; Guanghua Hospital of Integrated Traditional Chinese Medicine and Western Medicine, Shanghai University of Traditional Chinese Medicine, Orthopaedics</p> <p>Xiao, Lian-bo; Guanghua Hospital of Integrated Traditional Chinese Medicine and Western Medicine, Shanghai University of Traditional Chinese Medicine, Orthopaedics</p> |
| <b>Primary Subject Heading</b>: | Medical management                                                                                                                                                                                                                                                                                                                                                                                                                                                                                                                                                                                                                                                                                                                                                                                                                                                                                                                                                                                                                                                                                                                                                                                                                                                                                                                                                                                                                                                                                                                                                                                                                                                                                                                                               |
| Secondary Subject Heading:      | Surgery                                                                                                                                                                                                                                                                                                                                                                                                                                                                                                                                                                                                                                                                                                                                                                                                                                                                                                                                                                                                                                                                                                                                                                                                                                                                                                                                                                                                                                                                                                                                                                                                                                                                                                                                                          |
| Keywords:                       | Rheumatoid arthritis, tranexamic acid, total knee arthroplasty, perioperative blood management, Knee < ORTHOPAEDIC & TRAUMA                                                                                                                                                                                                                                                                                                                                                                                                                                                                                                                                                                                                                                                                                                                                                                                                                                                                                                                                                                                                                                                                                                                                                                                                                                                                                                                                                                                                                                                                                                                                                                                                                                      |

1  
2  
3  
4  
5  
6  
7  
8  
9  
10  
11  
12  
13  
14  
15  
16  
17  
18  
19  
20  
21  
22  
23  
24  
25  
26  
27  
28  
29  
30  
31  
32  
33  
34  
35  
36  
37  
38  
39  
40  
41  
42  
43  
44  
45  
46  
47  
48  
49  
50  
51  
52  
53  
54  
55  
56  
57  
58  
59  
60

|  |                                                                 |
|--|-----------------------------------------------------------------|
|  | SURGERY, Paediatric orthopaedics < ORTHOPAEDIC & TRAUMA SURGERY |
|  |                                                                 |

SCHOLARONE™  
Manuscripts

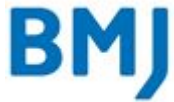

I, the Submitting Author has the right to grant and does grant on behalf of all authors of the Work (as defined in the below author licence), an exclusive licence and/or a non-exclusive licence for contributions from authors who are: i) UK Crown employees; ii) where BMJ has agreed a CC-BY licence shall apply, and/or iii) in accordance with the terms applicable for US Federal Government officers or employees acting as part of their official duties; on a worldwide, perpetual, irrevocable, royalty-free basis to BMJ Publishing Group Ltd ("BMJ") its licensees and where the relevant Journal is co-owned by BMJ to the co-owners of the Journal, to publish the Work in this journal and any other BMJ products and to exploit all rights, as set out in our [licence](#).

The Submitting Author accepts and understands that any supply made under these terms is made by BMJ to the Submitting Author unless you are acting as an employee on behalf of your employer or a postgraduate student of an affiliated institution which is paying any applicable article publishing charge ("APC") for Open Access articles. Where the Submitting Author wishes to make the Work available on an Open Access basis (and intends to pay the relevant APC), the terms of reuse of such Open Access shall be governed by a Creative Commons licence – details of these licences and which [Creative Commons](#) licence will apply to this Work are set out in our licence referred to above.

Other than as permitted in any relevant BMJ Author's Self Archiving Policies, I confirm this Work has not been accepted for publication elsewhere, is not being considered for publication elsewhere and does not duplicate material already published. I confirm all authors consent to publication of this Work and authorise the granting of this licence.

1 **The protocol of a single-blinded, randomized, parallel-controlled study to**  
2 **evaluate the effects of multiple-dose of tranexamic acid on perioperative blood**  
3 **loss in total knee arthroplasty in patients with rheumatoid arthritis**

4 Bing-xin Kang\*, Hui Xu\*, Chen-xin Gao, Sheng Zhong, Jing Zhang, Jun Xie,  
5 Song-tao Sun, Ying-hui Ma, Wei-tao Zhai, Lian-bo Xiao

6 **Author Affiliations:**

7 Bing-xin Kang, MD, Department of Orthopaedics, Guanghua Hospital of Integrated  
8 Traditional Chinese Medicine and Western Medicine, Shanghai University of  
9 Traditional Chinese Medicine, Shanghai, China,15738314790@163.com

10 Hui Xu, MD, Department of Orthopaedics, Guanghua Hospital of Integrated  
11 Traditional Chinese Medicine and Western Medicine, Shanghai University of  
12 Traditional Chinese Medicine, Shanghai, China,1511911882@qq.com

13 Chen-xin Gao, MD, Department of Orthopaedics, Guanghua Hospital of Integrated  
14 Traditional Chinese Medicine and Western Medicine, Shanghai University of  
15 Traditional Chinese Medicine, Shanghai, China, 706046133@qq.com

16 Sheng Zhong, MD, Department of Orthopaedics, Guanghua Hospital of Integrated  
17 Traditional Chinese Medicine and Western Medicine, Shanghai University of  
18 Traditional Chinese Medicine, Shanghai, China, drcyan@foxmail.com

19 Jing Zhang, MD, Department of Orthopaedics, Guanghua Hospital of Integrated  
20 Traditional Chinese Medicine and Western Medicine, Shanghai University of  
21 Traditional Chinese Medicine, Shanghai, China,franksamo@126.com

22 Jun Xie, MD, Department of Orthopaedics, Guanghua Hospital of Integrated

1  
2  
3  
4 23 Traditional Chinese Medicine and Western Medicine, Shanghai University of  
5  
6  
7 24 Traditional Chinese Medicine, Shanghai, China, leoxie199@126.com  
8  
9 25 Song-tao Sun, MD, Department of Orthopaedics, Guanghua Hospital of Integrated  
10  
11  
12 26 Traditional Chinese Medicine and Western Medicine, Shanghai University of  
13  
14  
15 27 Traditional Chinese Medicine, Shanghai, China, sstever0156258@aliyun.com  
16  
17 28 Ying-hui Ma, MD, Department of Orthopaedics, Guanghua Hospital of Integrated  
18  
19  
20 29 Traditional Chinese Medicine and Western Medicine, Shanghai University of  
21  
22  
23 30 Traditional Chinese Medicine, Shanghai, China, mayinghui021@126.com  
24  
25 31 Wei-tao Zhai, MD, Department of Orthopaedics, Guanghua Hospital of Integrated  
26  
27  
28 32 Traditional Chinese Medicine and Western Medicine, Shanghai University of  
29  
30  
31 33 Traditional Chinese Medicine, Shanghai, China, 13901808309@163.com  
32  
33 34 Lian-bo Xiao, MD, Department of Orthopaedics, Guanghua Hospital of Integrated  
34  
35  
36 35 Traditional Chinese Medicine and Western Medicine, Shanghai University of  
37  
38  
39 36 Traditional Chinese Medicine, Shanghai, China, 13701888178@163.com  
40  
41 37 Bing-xin Kang and Hui Xu contributed equally to this paper.

42  
43 **Corresponding Author:**

44  
45 39 Lian-bo Xiao, PhD, Guanghua Hospital of Integrated Traditional Chinese Medicine  
46  
47  
48 40 and Western Medicine, Shanghai University of Traditional Chinese Medicine. No.  
49  
50  
51 41 540 Xinhua Road, Changning District, Shanghai (CN 200000), China,  
52  
53 42 13701888178@163.com, +8613701888178  
54  
55

56 43

57  
58 44 **Author Contributions:**  
59  
60



1  
2  
3  
4 45 B-xK, HX and L-bX conceived the study while B-xK and HX drafted the study  
5  
6 46 protocol, B-xK and HX contributed equally to this work and should be regarded as  
7  
8  
9 47 co-first authors. The study protocol was designed by C-xG, SZ, JZ, JX, S-tS, Y-hM,  
10  
11  
12 48 and W-tZ. All authors approved the final manuscript of this study protocol.

13  
14 49 **Word Count: 2736**

15  
16  
17 50 **Funding:**

18  
19 51 This work will be supported by the Foundation of Health and Family planning  
20  
21 52 Commission of Shanghai (Grant No. ZY(2018-2020)-FWTX-6023).

22  
23 53 **Conflicts of Interests**

24  
25 54 The authors declared that there are no potential conflicts of interest with respect  
26  
27  
28 55 to the research, authorship, and/or publication of this study.

29  
30  
31 56  
32  
33 57 **Abstract:**

34  
35  
36 58 Introduction: This clinical trial is designed to evaluate the effect of multiple-dose  
37  
38 59 tranexamic acid (TXA) on perioperative hidden blood loss (HBL) in patients with  
39  
40  
41 60 rheumatoid osteoarthritis (RA).

42  
43  
44 61 Methods and analysis: A randomized, single-blinded, parallel-controlled study design  
45  
46 62 will be designed. RA patients (age 50-75 years) undergoing unilateral primary  
47  
48  
49 63 end-stage total knee arthroplasty (TKA) will be randomly divided into Group A or  
50  
51 64 Group B. Group A will be treated with one dose of TXA (1g; intravenous injection at  
52  
53  
54 65 the 3<sup>rd</sup>hour) and Group B with three doses (at the 3<sup>rd</sup>, 6<sup>th</sup>, and 12<sup>th</sup> hours; intravenous  
55  
56  
57 66 injection) after surgery. The primary outcomes will be evaluated with blood loss and  
58  
59  
60 67 haemoglobin level and the secondary outcomes with blood inflammatory factors,

1  
2  
3  
4 68 serum inflammatory factors, and coagulation parameters.  
5

6 69 Ethics and dissemination: This study has been approved by the ethics committee, and  
7  
8  
9 70 subsequent modifications of the protocol will be reported and approved by it. All of  
10  
11  
12 71 the participants or their authorised agents will give written informed consent before  
13  
14 72 the study.  
15

16  
17 73 Ethical number: 2019-K-13.  
18

19  
20 74 Trial registration number: ChiCTR1900025013  
21

22 75 Keywords: Rheumatoid arthritis, tranexamic acid, total knee arthroplasty,  
23  
24  
25 76 perioperative blood management, blood loss, clinical trial protocol.  
26

## 27 28 29 30 78 **Article Summary**

### 31 32 79 *Strengths and limitations of this trial*

33  
34  
35 80 (1) This is the first study in China to evaluate the efficacy and safety of  
36  
37  
38 81 perioperative multiple-dose regimen of TXA after TKA in RA patients.

39  
40 82 (2) The bias of this study reduced dramatically by extensive study design which  
41  
42  
43 83 includes proper randomization, allocation concealment and objective indicator.

44  
45 84 (3) Long-term follow-ups of some patients can only be conducted by phone.  
46

47  
48 85 (4) The results can only be extrapolated to Chinese RA population.  
49

## 50 51 52 53 87 **Introduction**

54  
55  
56 88 Rheumatoid arthritis (RA) may be accompanied by hematological diseases, like  
57  
58 89 anemia.<sup>1</sup> The overall prevalence of RA is 0.5-1% in Europe and North America,  
59  
60

1  
2  
3  
4 90 0.31% in France, 0.32-0.38% in China, and 0.02-0.047% in Japan.<sup>2-3</sup> Total knee  
5  
6  
7 91 arthroplasty(TKA) is effective in treating flexion contracture and maintaining the  
8  
9 92 stability of RA knee.<sup>4</sup> About 0.005% of RA patients receive TKA, a rate that has  
10  
11  
12 93 gradually decreased over the past decades. Even though, surgery remains the first  
13  
14 94 choice for articular deformity and pain, despite that disease-modifying antirheumatic  
15  
16  
17 95 drugs(DEMARs) and biologics agents can manage synovitis-related symptoms in  
18  
19 96 RA patients.<sup>5</sup> The haemorrhage is a major perioperative complications of TKA.<sup>6</sup>  
20  
21  
22 97 Excessive blood loss should be replenished with allogeneic blood transfusion, but it  
23  
24  
25 98 may cause immune complications, prolong hospitalization time and increase the  
26  
27  
28 99 infection rate.<sup>7-8</sup> Haemoglobin has an obviously negative correlation with disease  
29  
30 100 activity in RA.<sup>9</sup> Therefore, we believe that perioperative blood management is need  
31  
32  
33 101 for patients with RA.

34  
35 102 Accounting for 50% of the total blood loss, hidden blood loss (HBL) happens as  
36  
37  
38 103 the blood lost infiltrates into the tissue intraoperatively and postoperatively, resides in  
39  
40  
41 104 the knee joint cavity and gets haemolyzed.<sup>10</sup> As this blood is not involved in the blood  
42  
43  
44 105 circulation, HBL often leads to the joint swell, postoperative inflammation and  
45  
46  
47 106 pain.<sup>11-12</sup>

48 107 Surgical tourniquet use, can reduce intraoperative bleeding,<sup>13</sup> provide a clear  
49  
50  
51 108 view during the surgery, and facilitate the connection between the cement, bone and  
52  
53  
54 109 joint prostheses.<sup>14</sup> However, after the release of the tourniquet, local tissue may be  
55  
56  
57 110 damaged by ischemia reperfusion injury, and fibrinolytic system activated.<sup>15-16</sup> As a  
58  
59  
60 111 consequence, peripheral blood circulation is accelerated, plasma fibrinolysis enhanced,

1  
2  
3  
4 112 and postoperative HBL increased.<sup>15</sup> Therefore, reducing the dissolution of fibrin can  
5  
6 113 reduce postoperative HBL.<sup>17</sup> Tranexamic acid (TXA) is a synthetic lysine derivative  
7  
8  
9 114 that can competitively inhibit the binding between plasminogen and fibrin, prevent the  
10  
11  
12 115 activation of plasminogen, and protect fibrin from degradation and dissolution by  
13  
14 116 plasmin. TXA is initially used in obstetrics and gynaecology, then gradually  
15  
16  
17 117 replicated in surgeries to reduce bleeding and avoid blood transfusion rates.<sup>18-19</sup> The  
18  
19 118 CRASH-2 trial has demonstrated the effectiveness and safety of TXA in reducing  
20  
21  
22 119 blood loss.<sup>20</sup> A large amount of literature has reported that TXA can significantly  
23  
24  
25 120 reduce peri-TKA blood loss.<sup>21-25</sup> Currently, TXA is recommended for perioperative  
26  
27  
28 121 blood management of TKA.<sup>26</sup> But, its efficacy and safety in RA patients undergoing  
29  
30  
31 122 TKA has been rarely reported.<sup>27</sup> TXA can be administered through oral intake, single  
32  
33 123 large-dose intravenous injection, intra-articular injection, joint cavity irrigation,  
34  
35 124 postoperative drainage tube injection, and combination use.<sup>25,28-31</sup> There is no  
36  
37  
38 125 consensus on the optimal dose and time of TXA administration during perioperative  
39  
40  
41 126 TKA.<sup>18,32-33</sup> Studies have shown that fibrinolysis peaks at 6 hours and continues for  
42  
43 127 approximately 18 hours after TKA with tourniquets.<sup>34</sup> The half-life of TXA in plasma  
44  
45 128 is 2 hours, and its concentration peaks at 1 hour after injection.<sup>35</sup> Thus, we suspect  
46  
47  
48 129 that a single dose of TXA may not be sufficient to exert an anti-fibrinolytic. There are  
49  
50  
51 130 also studies suggesting that for patients with osteoarthritis, higher doses (within a  
52  
53  
54 131 limit) during the perioperative period can increase the efficacy of TXA.<sup>36-38</sup> The  
55  
56 132 purpose of this clinical trial is to verify the effectiveness and safety of multiple doses  
57  
58  
59 133 of TXA in reducing perioperative blood loss in RA patients treated with TKA, hoping  
60

1  
2  
3  
4 134 to find a new mode of perioperative blood management for TKA.  
5  
6  
7 135

## 9 136 **Methods and analysis**

### 11 137 *Study context*

13 14  
15 138 This clinical trial will start on September 1, 2019 at the wards of Shanghai  
16  
17 139 University of Traditional Chinese Medicine Guanghai Hospital (Shanghai,  
18  
19 140 China).The annual surgical number of TKA for RA patients was about 300 in 2018.  
20  
21  
22 141 Eleven investigators include 2 senior orthopaedic surgeons (L-bX, W-tZ) with 20  
23  
24 142 years of clinical experience and 6 orthopaedic physicians (C-xG, JZ, JX, S-sT, Y-hM  
25  
26 143 and SZ), 2 data collectors and who are also statisticians (B-xK and HX) and a nurse  
27  
28 144 (X-rX). Informed consent will be obtained. The perioperative ERAS blood  
29  
30 145 management programme and the trial flow chart are shown in Table 1 and Figure 1.  
31  
32  
33 146 The schedule is shown in Table 2.  
34  
35  
36  
37

### 38 147 *Sample size calculation*

39  
40 148 This trial uses a completely randomized design, and multiple sample sizes are  
41  
42 149 estimated by a previous clinical research review. The main outcome is measured with  
43  
44 150 the amount of HBL. The overall mean estimate is  $\sigma = 320$ , and the overall standard  
45  
46 151 deviation is  $\mu = 79$ , both estimated by the statistical formula  
47  
48  
49  
50  
51 152  $n = \frac{z^2 \left( \sum_{i=1}^k \sigma_i^2 / k \right) / \left[ \sum_{i=1}^k (\mu_i - \mu)^2 / (k-1) \right]}$ . Considering a dropout rate of 20%, 76 subjects are  
52  
53 153 required to yield a power of 90% with a significance level of 0.05.  
54  
55

### 56 154 *Randomization and allocation concealment*

57  
58  
59  
60

1  
2  
3  
4 155 Patients are randomly assigned to two groups according to at 1:1 ratio; SPSS  
5  
6 156 version25.0 (IBM Corporation, Armonk, NY) is used to generate a random sequence  
7  
8  
9 157 containing 76 random numbers, which are placed into an opaque envelope and put in  
10  
11  
12 158 a computer by encryption. The group data is saved by the statistician. Only the nurse  
13  
14 159 is allowed to check the enrollment and give the corresponding treatment.

#### 160 *Single-blinded design*

161 Only the nurse will be allowed to know the patients' enrollment and give them  
162 corresponding treatment. The outcome evaluators will objectively record the patients'  
163 test results.

#### 164 *Eligibility criteria*

165 The eligibility criteria are set in accordance with the "AMERICAN  
166 RHEUMATISM ASSOCIATION CRITERIA FOR RHEUMATOID ARTHRITIS"  
167 from the American Journal of Rheumatism (revised in 1978),<sup>39</sup> and the 2010  
168 "ACR/EULAR classification criteria for rheumatoid arthritis"<sup>40</sup> (1)The patient is  
169 diagnosed with RA in Stage III or IV according to the Kellgren-Lawrence<sup>41</sup>  
170 classification; (2)The patient is 50 to 75 years old; (3)The patient will undergo the  
171 unilateral primary TKA; (4)The patients will receive perioperative anti-fibrinolytic  
172 TXA therapy; and (5)The patient will show normal blood-clotting function and no  
173 preoperative anaemia.

#### 174 *Exclusion criteria*

175 Excluded are those with: (1)Other types of arthritis (such as primary arthritis,  
176 post-traumatic osteoarthritis, gouty osteoarthritis, haemophilic osteoarthritis, and

1  
2  
3  
4 177 tuberculous arthritis); (2)Bilateral knee arthroplasty (RA patients); (3)Severe  
5  
6 178 cardiovascular disease (such as myocardial infarction, atrial fibrillation, angina  
7  
8  
9 179 pectoris, and heart failure) or cerebrovascular disease (cerebral infarction and cerebral  
10  
11  
12 180 haemorrhage);and (4)Prolonged use of oral anticoagulant drugs (such as aspirin,  
13  
14 181 warfarin, and clopidogrel).

15  
16  
17 182 *Elimination criteria*

18  
19  
20 183 Eliminated are those with: (1)Acquired color vision disorder; (2)Active  
21  
22 184 intravascular coagulation patients; and (3)a history of convulsions.

23  
24  
25 185 *Termination criteria*

26  
27 186 The study on one patient will be terminated if he/she shows the following  
28  
29  
30 187 events: (1)Shock; (2)Allergic symptoms, such as itching and a rash; (3)Digestive  
31  
32 188 disorders, such as nausea, vomiting, loss of appetite, and diarrhoea after medication;  
33  
34  
35 189 (4)Reactive dermatitis, dizziness, hypotension, drowsiness, headache; convulsions,  
36  
37  
38 190 visual impairment, and others; and (5)Adverse events, such as intracranial thrombosis  
39  
40 191 and intracranial haemorrhage after medication.

41  
42  
43 192 *Perioperative anti-rheumatic treatment*

44  
45 193 Methotrexate and hydroxychloroquine will be used during the perioperative  
46  
47  
48 194 period. Leflunomide will be discontinued at one week before surgery. Use of other  
49  
50 195 disease-modifying antirheumatic drugs (DMARDs) will be discontinued two days  
51  
52  
53 196 before surgery, and restarted at 1-2 days after gastrointestinal function recovery. The  
54  
55  
56 197 use of newer biologic agents targeting tumor necrosis (TNF- $\alpha$ ) will be discontinued  
57  
58 198 for 4 to 5 half-lives before surgery and restarted after wound healing and infection  
59  
60

1  
2  
3  
4 199 elimination.<sup>42-43</sup>  
5

6  
7 200 *Surgery and anesthesia*  
8

9 201 Surgery will be performed by two senior surgeons (L-bX and W-tZ). The  
10  
11 202 operations will be conducted under general anaesthesia. A median incision (14-17 cm  
12  
13 203 long) is cut in the knee joint with a medial paramedian support band. Internal  
14  
15 204 positioning is used for femoral bone marrow and external positioning for tibial bone  
16  
17 205 marrow. All patients will use a tourniquet with a pressure of 230-250 mmHg. During  
18  
19 206 the operation, blood pressure will be reduced to 20% of the basal level through a  
20  
21 207 suction drainage tube, and limb surgery will be conducted with an elastic bandage.  
22  
23 208 During the operation, conventional anti-infective, combined analgesic,  
24  
25 209 anti-inflammatory, and anti-coagulation treatment and other symptomatic treatments  
26  
27 210 will be administered according to the "Chinese Hip and Total Knee Arthroplasty  
28  
29 211 Surgery Perioperative Anti-fibrinolytic Drug Sequential Anticoagulant Application  
30  
31 212 Programme Expert Consensus". Ten minutes before the incision, 1 g of TXA + 100  
32  
33 213 mL of intravenous-saline and 1.5 g of TXA + 50 mL articular-injection saline will be  
34  
35 214 administered preoperatively in the sutured joint cavity.  
36  
37  
38  
39  
40  
41  
42  
43  
44

45 215 TXA is produced by Hunan Dongting Pharmaceutical Co., Ltd., and used  
46  
47 216 according to the second edition of 2015 Chinese Pharmacopoeia and Drug  
48  
49 217 Supplement Application Approval (2013B02016), YBH07372010; the approval  
50  
51 218 number is National Drug Standard H43020565.  
52  
53  
54

55  
56 219 *Intraoperative blood loss*  
57

58 220 The amount of intraoperative blood loss= the total volume of fluid in the  
59  
60



1  
2  
3  
4 221 negative pressure drain—the volume of normal saline.  
5

6 222 *Study interventions*  
7  
8

9 223 Group A: 1 g of TXA + 100 mL of physiological saline will be injected  
10  
11 224 intravenously at the 3<sup>rd</sup> hour after the operation. Group B: 1 g of TXA + 100 mL of  
12  
13 225 physiological saline is intravenously instilled at the 3<sup>rd</sup>, 6<sup>th</sup>, and 12<sup>th</sup> hours after the  
14  
15 226 operation.  
16  
17

18 227 *Pain management and rehabilitation*  
19  
20

21 228 A cocktail injection will be given during the operation, and 0.2 g of oral  
22  
23 229 celecoxib after surgery for analgesia. After anaesthesia the maximum angles of  
24  
25 230 flexion and extension of the ankle will be maintained for 6 seconds, and the foot is  
26  
27 231 relaxed for 5 seconds; the quadriceps contractions are equal between the two sides. At  
28  
29 232 the first postoperative day, the patients will exercise straight-leg-raise,  
30  
31 233 supine-knee-flexion and knee flexion and extension in sitting; the machine-assisted  
32  
33 234 exercises will begin on the third day after surgery, such as continuous passive motion.  
34  
35  
36  
37  
38

39 235 *Antibiotics*  
40

41 236 For perioperative prophylaxis, cefazolin sodium antibiotics are administered at  
42  
43 237 30 minutes before surgery, and 24-48 hours after surgery.  
44  
45

46 238 *Prevention of lower extremity venous thrombosis*  
47  
48

49 239 Six hours after the surgery, perioperative enoxaparin sodium (60mg, once a day  
50  
51 240 for 14 days) is injected for preventing deep vein thrombosis.  
52  
53

54 241

55 242 *Outcomes*  
56

57 243 *Primary outcomes*  
58  
59  
60

1  
2  
3  
4 244 *The blood loss, haemoglobin level*

5  
6 245 The blood loss is calculated according to the formula by Nadle<sup>44</sup> and Gross

7  
8  
9 246 formula:<sup>45</sup> Patient's blood volume (PBV)=  $K1 \times \text{height}^3(\text{m}^3) + K2 \times \text{weight}(\text{kg}) +$

10  
11  
12 247  $K3$ (Male:  $K1=0.3669, K2=0.03219, K3=0.6041$ . Female:  $K1=0.3561, K2=0.03308,$

13  
14  
15 248  $K3=0.1833$ ). Total blood loss (TBL)= $\text{PBV} \times (\text{Hct}_{\text{pre}} - \text{Hct}_{\text{post}})$ . HBL= $\text{PBV} \times (\text{Hct}_{\text{pre}} -$

16  
17 249  $\text{Hct}_{\text{post}}) / \text{Hct}_{\text{ave}}$ .

18  
19  
20 250 Preoperatively, at the 1<sup>st</sup>, 3<sup>rd</sup>, 7<sup>th</sup> and 14<sup>th</sup> days after surgery, we will calculate the

21  
22 251 HBL based on the value of haematocrit and recorded the count of haemoglobin.

23  
24  
25 252 *Secondary outcomes*

26  
27 253 *Inflammatory index, inflammatory factor and coagulation index*

28  
29  
30 254 Preoperatively, at the 1<sup>st</sup>, 3<sup>rd</sup>, 7<sup>th</sup> and 14<sup>th</sup> days after surgery, we will record the

31  
32 255 erythrocyte sedimentation rate (ESR) and C-reactive protein (CRP) in the whole

33  
34  
35 256 blood and interleukin 6 (IL-6), interleukin 12 (IL-12), and TNF- $\alpha$  in the plasma.

36  
37  
38 257 Whole blood test indicators and plasma inflammatory factors will be assessed in the

39  
40 258 participating hospital (Department of Clinical Laboratory of Guanghua Hospital of

41  
42  
43 259 Integrated Traditional Chinese Medicine and Western Medicine). The indicators and

44  
45 260 factors will be tested by an inspector who is not involved in this clinical trial.

46  
47  
48 261 *Knee function and swelling*

49  
50 262 Knee function will be measured using the American Keen Society Score (AKSS)

51  
52  
53 263 at one day before surgery and at the 3<sup>rd</sup>, 7<sup>th</sup> and 14<sup>th</sup> days after surgery. A trained

54  
55  
56 264 researcher will educate all patients until they fully know how to assess their knee

57  
58  
59 265 function through the questionnaires. The rate of swelling is defined as the

60

1  
2  
3  
4 266 postoperative circumference of the upper tibia ÷ the preoperative circumference of the  
5  
6 267 upper tibia.

8  
9 268 *Adverse events*

11 269 Adverse events include (1)Deep vein thrombosis<sup>46</sup> (acute onset, affected limb  
12 swelling, sever pain, or significant tenderness at the femoral triangle or/and leg);  
13  
14 270 (2)Extensive swelling on the affected limb; (3)A dull red color and a rise in the skin  
15  
16 271 of the affected limb; (4)Generalized shallow venous tension on the affected limb;  
17  
18 272 (5)In the skin of the affected limb; (6)Pulmonary embolism diagnosed by Doppler  
19  
20 273 ultrasound and venography (clinical manifestations: cough, chest tightness,  
21  
22 274 palpitations, haemoptysis, shortness of breath, dizziness, shock, cyanosis, increased  
23  
24 275 respiratory rate, arteriovenous filling or pulsation, etc.) and pulmonary embolism  
25  
26 276 diagnosed by CT.  
27  
28  
29  
30  
31  
32  
33

34  
35 278 The wound healing process and complications<sup>47</sup> (wound bleeding, haematoma,  
36  
37 279 wound infection, and deep infection) will be observed and recorded in the patient's  
38  
39 280 case report forms (CRFs) during hospitalization and follow-ups. Wound exudation is  
40  
41 281 defined as the presence of exudation from the wound even 48 hours after surgery.  
42  
43  
44

45 282 *Adverse event treatment*

47 283 Adverse events during the follow-up will be recorded in the CRFs, and their  
48  
49 284 relevance to drug use will be evaluated. All the adverse events will be classified in  
50  
51 285 accordance with the five-level scoring systems (5.0) of the CTCAE.  
52  
53

54 286 Serious adverse events are defined as those that may cause cancer, defects,  
55  
56 287 teratogenicity, death, and permanent damage to organ function, permanent or  
57  
58 288 significant disability, and prolonged hospital stay. In any event, the researcher should  
59  
60

1  
2  
3 289 immediately take appropriate measures and report it to the hospital and ethics  
4  
5 290 committees within 24 hours.  
6

7  
8 291 *Data management* >  
9

10 292 Data on the CRFs will be put in the computer by two independent trained  
11  
12 293 research assistants with a double-entry method. The hospital's independent  
13  
14 294 investigators will check the data periodically.  
15

16  
17 295 *Statistical analysis*  
18

19 296 The analyses are as follows: (1)Descriptive analysis on the characteristics of the  
20  
21 297 study participants; (2)Balance analysis on the baseline values in groups;  
22  
23 298 (3)Comparison of the balance between groups of primary outcomes; and  
24  
25 299 (4)Comparison of secondary outcomes and safety between groups.  
26  
27  
28

29 300 The total rate of adverse events of the two groups are tested by bidirectional  
30  
31 301 disordered R\*C list chi-square test. The association between the incidence of adverse  
32  
33 302 events and the dose of TXA used is described.  
34  
35  
36

37 303 *Ethics and dissemination*  
38

39 304 Written inform consent will be obtained from all participants or their authorised  
40  
41 305 agents before the study. All TXA treatments will be free. Research data will be kept  
42  
43 306 strictly confidential and obtained from appropriate authors upon reasonable  
44  
45 307 request .Results of the trial will be published on the website of the China Clinical  
46  
47 308 Trials Registry and in peer-reviewed journals.  
48  
49  
50

51  
52 309 *The Patient and Public Involvement*  
53

54  
55 310 Patients and public will not be involved in the development of the research  
56  
57 311 question or in the design of the study. Patients will receive oral and written  
58  
59  
60

1  
2  
3  
4 312 information about this trial, pertaining to the benefits, risks and discomforts that they  
5  
6 313 may get from the study. They will not be involved in the recruitment and conduct of  
7  
8  
9 314 the study. Besides, the burden of the intervention will be assessed by patients  
10  
11 315 themselves. After signing an informed consent, they will be assessed for eligibility  
12  
13  
14 316 and data will be collected. Dissemination of the general results (no personal data) will  
15  
16  
17 317 be made on demand.

## 18 19 318 **Discussion**

20  
21  
22  
23 319 Controlling blood loss can facilitate the recovery from TKA surgery. Previous  
24  
25 320 clinical studies have shown that high dose of TXA can reduce blood loss after TKA in  
26  
27 321 patients with osteoarthritis.<sup>27,47-48</sup> In this trial, we will exclude patients with a large  
28  
29 322 number of intravenous infusions to eliminate the effect of blood dilution on the results.  
30  
31 323 We will use a tourniquet to minimize the blood loss during the operation. Therefore,  
32  
33 324 what we will observed is the blood loss after the removal of tourniquet.<sup>10</sup> It has been  
34  
35 325 reported that intravenous infusion combined with intra-articular injection of TXA may  
36  
37 326 be the optimal bleeding-control scheme.<sup>49-50</sup> Previous studies have shown that knee  
38  
39 327 joint swelling after TKA is associated with HBL in the joint cavity. TXA can reduce  
40  
41 328 postoperative HBL, thereby relieving the swelling around the joint.<sup>51</sup> Given that  
42  
43 329 plasminogen activators play an important role in RA-involved inflammation, the  
44  
45 330 dissolution of fibrin will trigger an inflammatory response.<sup>52</sup> Therefore, we suspect  
46  
47 331 that multiple doses of TXA in the peroperative period may exert an auxiliary  
48  
49 332 anti-inflammatory effect.  
50  
51  
52  
53  
54  
55  
56  
57  
58  
59  
60

1  
2  
3  
4 333 This study will provide new evidence for managing perioperative HBL in TKA  
5  
6 334 in Chinese RA patients.  
7  
8

9 335

10  
11 336 **Acknowledgment:**  
12  
13

14  
15 337 The authors thank all the patient advisers for participating in this study.  
16  
17

18  
19 338

20  
21 339

22  
23  
24 340 **References:**  
25

26  
27 341 1 Goyal L, Shah PJ, Yadav RN, *et al.* Anaemia in newly diagnosed patients of  
28  
29 342 rheumatoid arthritis and its correlation with disease activity. *J Assoc Physicians*  
30  
31 343 *India* 2018;66:26–9.

32  
33  
34 344 2 Minichiello E, Semerano L, Boissier MC. Time trends in the incidence,  
35  
36 345 prevalence, and severity of rheumatoid arthritis: A systematic literature review.  
37  
38 346 *Jt Bone Spine* 2016;83:625–30.

39  
40 347 3 Shichikawa K, Inoue K, Hirota S, *et al.* Changes in the incidence and  
41  
42 348 prevalence of rheumatoid arthritis in Kamitonda, Wakayama, Japan, 1965-1996.  
43  
44 349 *Ann Rheum Dis* 1999;58:751–6.

45  
46 350 4 Yan D, Yang J, Pei F. Total knee arthroplasty treatment of rheumatoid arthritis  
47  
48 351 with severe versus moderate flexion contracture. *Journal of orthopaedic*  
49  
50 352 *surgery and research* 2013;8:41.

51  
52 353 5 Louie GH, Ward MM. Changes in the rates of joint surgery among patients  
53  
54  
55  
56  
57  
58  
59  
60

1  
2  
3  
4  
5  
6  
7  
8  
9  
10  
11  
12  
13  
14  
15  
16  
17  
18  
19  
20  
21  
22  
23  
24  
25  
26  
27  
28  
29  
30  
31  
32  
33  
34  
35  
36  
37  
38  
39  
40  
41  
42  
43  
44  
45  
46  
47  
48  
49  
50  
51  
52  
53  
54  
55  
56  
57  
58  
59  
60

- 354 with rheumatoid arthritis in California, 1983–2007. *Annals of the rheumatic*  
355 *diseases* 2011;69:868–71.
- 356 6 Ker K, Roberts I. Tranexamic acid for surgical bleeding. *BMJ* 2014;349:10–1.
- 357 7 Freedman J, Luke K, Escobar M, et al. Experience of a network of transfusion  
358 coordinators for blood conservation (Ontario Transfusion Coordinators  
359 [ONTraC]). *Transfusion* 2008;48:237-50.
- 360 8 McCormack PL. Tranexamic Acid: A review of its use in the treatment of  
361 hyperfibrinolysis. *Drugs* 2012;72:585–617.
- 362 9 Padjen I, Öhler L, Studenic P, et al. Clinical meaning and implications of serum  
363 hemoglobin levels in patients with rheumatoid arthritis. *Semin Arthritis Rheum*  
364 2017;47:193–8.
- 365 10 Sehat KR, Evans R, Newman JH. How much blood is really lost in total knee  
366 arthroplasty? Correct blood loss management should take hidden loss into  
367 account. *The Knee* 2000;7:151–5.
- 368 11 Ishida K, Tsumura N, Kitagawa A, et al. Intra-articular injection of tranexamic  
369 acid reduces not only blood loss but also knee joint swelling after total knee  
370 arthroplasty. *International orthopaedics*, 2011, 35: 1639-1645.
- 371 12 Liu X, Zhang X, Chen Y, et al. Hidden blood loss after total hip arthroplasty.  
372 *The Journal of arthroplasty*, 2011, 26: 1100-1105.
- 373 13 Tarwala R, Dorr LD, Gilbert PK, et al. Tourniquet use during cementation only  
374 during total knee arthroplasty: A randomized trial knee. *Clin Orthop Relat Res*  
375 2014;472:169–74.

- 1  
2  
3  
4 376 14 Hsu KL, Chang CW, Yang CY, *et al.* Tourniquet Use in Total Knee  
5  
6 377 *Arthroplasty. Prim Total Knee Arthroplast* Published Online First:2018.  
7  
8  
9 378 15 Schnettler T, Papillon N, Rees H. Use of a Tourniquet in Total Knee  
10  
11 379 *Arthroplasty Causes a Paradoxical Increase in Total Blood Loss. J Bone Jt*  
12  
13 380 *Surg - Am Vol* 2017;99:1331–6.  
14  
15  
16  
17 381 16 Aglietti P, Baldini A, Vena LM, *et al.* Effect of tourniquet use on activation of  
18  
19 382 coagulation in total knee replacement. *Clin Orthop Relat Res*  
20  
21 383 2000;371:169–77.  
22  
23  
24  
25 384 17 Benoni G, Lethagen S, Fredin H. The effect of tranexamic acid on local and  
26  
27 385 plasma fibrinolysis during total knee arthroplasty. *Thromb Res*  
28  
29 386 1997;85:195–206.  
30  
31  
32 387 18 Jennings JD, Solarz MK, Haydel C. Application of Tranexamic Acid in Trauma  
33  
34 388 and Orthopedic Surgery. *Orthop Clin North Am* 2016;47:137–43.  
35  
36  
37 389 19 Napolitano LM, Cohen MJ, Cotton BA, *et al.* Tranexamic acid in trauma. *J*  
38  
39 390 *Trauma Acute Care Surg* 2013;74:1575–86.  
40  
41  
42  
43 391 20 Shakur H, Roberts I, Bautista R, *et al.* CRASH-2 trial collaborators. Effects of  
44  
45 392 tranexamic acid on death, vascular occlusive events, and blood transfusion in  
46  
47 393 trauma patients with significant haemorrhage (CRASH-2): a randomised,  
48  
49 394 placebo-controlled trial. *Lancet* 2010;376:23-32.  
50  
51  
52  
53 395 21 Adravanti P, Di Salvo E, Calafiore G, *et al.* A prospective, randomized,  
54  
55 396 comparative study of intravenous alone and combined intravenous and  
56  
57 397 intraarticular administration of tranexamic acid in primary total knee  
58  
59  
60



- 1  
2  
3  
4 398 replacement. *Arthroplast Today* 2018;4:85–8.
- 5  
6 399 22 Prakash J, Seon JK, Park YJ, *et al.* A randomized control trial to evaluate the  
7  
8  
9 400 effectiveness of intravenous, intraarticular and topical wash regimes of  
10  
11 401 tranexamic acid in primary total knee arthroplasty. *J Orthop Surg* 2017;25:1–7.
- 12  
13  
14 402 23 Mao Z, Yue B, Wang Y, *et al.* A comparative, retrospective study of  
15  
16  
17 403 peri-articular and intra-articular injection of tranexamic acid for the  
18  
19 404 management of postoperative blood loss after total knee arthroplasty. *BMC*  
20  
21  
22 405 *Musculoskelet Disord* 2016;17:1–8.
- 23  
24 406 24 Jansen JA, Lameijer JRC, Snoeker BAM. Combined intravenous, topical and  
25  
26  
27 407 oral tranexamic acid administration in total knee replacement: Evaluation of  
28  
29 408 safety in patients with previous thromboembolism and effect on hemoglobin  
30  
31  
32 409 level and transfusion rate. *The Knee* 2017;24:1206–12.
- 33  
34 410 25 Lei Y, Xie J, Xu B, *et al.* The efficacy and safety of multiple-dose intravenous  
35  
36  
37 411 tranexamic acid on blood loss following total knee arthroplasty: a randomized  
38  
39 412 controlled trial. *Int Orthop* 2017;41:2053–9.
- 40  
41  
42 413 26 Zhen Y, Zongke Z, Fuxing P, *et al.* An expert consensus on the application of  
43  
44  
45 414 an anti-fibrinolytic anticoagulant drug during the perioperative period  
46  
47  
48 415 following hip and knee joint replacement in China. *Chinese Journal of Bone*  
49  
50 416 and Joint Surgery. *Chinese Journal of Bone and Joint Surgery*.2015;8:281–5.
- 51  
52  
53 417 27 Xie J, Hu Q, Huang Z, *et al.* Comparison of three routes of administration of  
54  
55  
56 418 tranexamic acid in primary unilateral total knee arthroplasty: Analysis of a  
57  
58 419 national database. *Thromb Res* 2019;173:96–101.
- 59  
60

- 1  
2  
3  
4 420 28 Hu WH. Efficacy of intravenous versus topical administration of tranexamic  
5  
6 421 acid in primary total knee arthroplasty. *Chinese J Tissue Eng Res*  
7  
8  
9 422 2018;22:356–61.  
10  
11 423 29 Yue C, Kang P, Yang P, *et al.* Topical application of tranexamic acid in  
12  
13  
14 424 primary total hip arthroplasty: A randomized double-blind controlled trial. *J*  
15  
16  
17 425 *Arthroplasty* 2014;29:2452–6.  
18  
19 426 30 Liu W, Yang C, Huang X, *et al.* Tranexamic Acid Reduces Occult Blood Loss,  
20  
21  
22 427 Blood Transfusion, and Improves Recovery of Knee Function after Total Knee  
23  
24  
25 428 Arthroplasty: A Comparative Study. *J Knee Surg* 2018;31:239–46.  
26  
27 429 31 Yang Y, Lv YM, Ding PJ, *et al.* The reduction in blood loss with intra-articular  
28  
29  
30 430 injection of tranexamic acid in unilateral total knee arthroplasty without  
31  
32  
33 431 operative drains: A randomized controlled trial. *Eur J Orthop Surg Traumatol*  
34  
35  
36 432 2015;25:135–9.  
37  
38 433 32 Young B, Moondi P. A questionnaire-based survey investigating the current use  
39  
40  
41 434 of tranexamic acid in traumatic haemorrhage and elective hip and knee  
42  
43  
44 435 arthroplasty. *JRSM Open* 2014;5:204253331351694.  
45  
46 436 33 Cid J, Lozano M. Tranexamic acid reduces allogeneic red cell transfusions in  
47  
48  
49 437 patients undergoing total knee arthroplasty: Results of a meta-analysis of  
50  
51  
52 438 randomized controlled trials. *Transfusion* 2005;45:1302–7.  
53  
54 439 34 Blanié A, Bellamy L, Rhayem Y, *et al.* Duration of postoperative fibrinolysis  
55  
56  
57 440 after total hip or knee replacement: A laboratory follow-up study. *Thromb Res*  
58  
59 441 2013;131:e6–11.  
60

- 1  
2  
3  
4 442 35 Hunt BJ. The current place of tranexamic acid in the management of bleeding.  
5  
6 443 *Anaesthesia* 2015;70:e18-53.  
7  
8  
9 444 36 Qiang P, Hong W, Xuan-ming LI, *et al.* Effects of High Doses of Tranexamic  
10  
11 445 Acid on the Fibrinolytic Activity and Inflammatory Response of Patients  
12  
13 446 undergoing Total Knee Arthroplasty \*. 2018;18:3319–22.  
14  
15  
16  
17 447 37 Demos HA, Lin ZX, Barfield WR, *et al.* Process Improvement Project Using  
18  
19 448 Tranexamic Acid Is Cost-Effective in Reducing Blood Loss and Transfusions  
20  
21 449 After Total Hip and Total Knee Arthroplasty. *J Arthroplasty* 2017;32:2375–80.  
22  
23  
24  
25 450 38 Tang Y, Wen Y, Li W, *et al.* The efficacy and safety of multiple doses of oral  
26  
27 451 tranexamic acid on blood loss, inflammatory and fibrinolysis response  
28  
29 452 following total knee arthroplasty: A randomized controlled trial. *Int J Surg*  
30  
31 453 2019;65:45–51.  
32  
33  
34  
35 454 39 SILMAN, A J . THE 1987 REVISED AMERICAN RHEUMATISM  
36  
37 455 ASSOCIATION CRITERIA FOR RHEUMATOID ARTHRITIS.  
38  
39 456 *Rheumatology* 1988;27:341–3.  
40  
41  
42  
43 457 40 Britsemmer K, Ursun J, Gerritsen M, *et al.* Validation of the 2010  
44  
45 458 ACR/EULAR classification criteria for rheumatoid arthritis: Slight  
46  
47 459 improvement over the 1987 ACR criteria. *Ann Rheum Dis* 2011;70:1468–70.  
48  
49  
50  
51 460 41 Kohn MD, Sassoon AA, Fernando ND. Classifications in Brief:  
52  
53 461 Kellgren-Lawrence Classification of Osteoarthritis. *Clin Orthop Relat Res*  
54  
55 462 2016;474:1886–93.  
56  
57  
58  
59 463 42 Krause ML, Matteson EL. Perioperative management of the patient with  
60

- 1  
2  
3  
4 464       rheumatoid arthritis. *World J Orthop* 2014;5:283–91.  
5  
6 465   43   Thorsness RJ, Hammert WC. Perioperative management of rheumatoid  
7  
8  
9 466       medications. *J Hand Surg Am* 2012;37:1928–31.  
10  
11 467   44   Nadler S B, Hidalgo J H, Bloch T. Prediction of blood volume in normal human  
12  
13  
14 468       adults. *Surgery* 1962;51:224–32.  
15  
16  
17 469   45   J B Gross. Estimating allowable blood loss: Corrected for dilution.  
18  
19 470       *Anesthesiology* 1983;58:277-280.  
20  
21  
22 471   46   Lee JT. Commentary on the “Guideline for Prevention of Surgical Site  
23  
24 472       Infection, 1999”. *American Journal of Infection Control* 1999;27:96.  
25  
26  
27 473   47   Park JH, Choi SW, Shin EH, *et al.* The optimal protocol to reduce blood loss  
28  
29 474       and blood transfusion after unilateral total knee replacement: Low-dose  
30  
31  
32 475       IA-TXA plus 30-min drain clamping versus drainage clamping for the first 3 h  
33  
34 476       without IA-TXA. *J Orthop Surg* 2017;25:1–7.  
35  
36  
37 477   48   Voorn VM, Marang-van de Mheen PJ, van der Hout A, *et al.* The effectiveness  
38  
39 478       of a de-implementation strategy to reduce low-value blood management  
40  
41 479       techniques in primary hip and knee arthroplasty: a pragmatic  
42  
43 480       cluster-randomized controlled trial. *Implement Science* 2017;12:72.  
44  
45  
46 481   49   Mi B, Liu G, Lv H, *et al.* Is combined use of intravenous and intraarticular  
47  
48 482       tranexamic acid superior to intravenous or intraarticular tranexamic acid alone  
49  
50 483       in total knee arthroplasty? A meta-analysis of randomized controlled trials. *J*  
51  
52 484       *Orthop Surg Res* 2017;12:1–9.  
53  
54  
55 485   50   Iseki T, Tsukada S, Wakui M, *et al.* Intravenous tranexamic acid only versus  
56  
57  
58  
59  
60

- 1  
2  
3  
4 486 combined intravenous and intra-articular tranexamic acid for perioperative  
5  
6 487 blood loss in patients undergoing total knee arthroplasty. *Eur J Orthop Surg*  
7  
8  
9 488 *Traumatol* 2018;28:1397–402.
- 10  
11 489 51 Ishida K, Tsumura N, Kitagawa A, *et al.* Intra-articular injection of tranexamic  
12  
13  
14 490 acid reduces not only blood loss but also knee joint swelling after total knee  
15  
16  
17 491 arthroplasty. *Int Orthop* 2011;35:1639–45.
- 18  
19 492 52 Li J, Ny A, Leonardsson G, *et al.* The plasminogen activator/plasmin system is  
20  
21  
22 493 essential for development of the joint inflammatory phase of collagen type  
23  
24  
25 494 II-induced arthritis. *Am J Pathol* 2005;166:783–92.
- 26  
27  
28 495

**Table 1** Enhanced recovery after surgery blood management

Preoperative

1 Treatment of hemorrhagic primary disease

2 Nutritional guidance, balanced diet

3 Iron application

4 rHuEPO application

Intraoperative

5 Minimally invasive surgery

6 Tourniquet optimization

7 Controlled buck

8 Autologous blood return

9 Use of tranexamic acid

Postoperative

10 Reduce bleeding (pressure dressing of wounds, prevent stress ulcers)

11 Nutritional support, iron supplementation, use of rHuEPO

rHuEPO, recombinant human erythropoietin.

496

**Table 2** The schedule of trial enrolment, interventions and assessments

|                                                | Outcome assessment |    |    |    |     |
|------------------------------------------------|--------------------|----|----|----|-----|
|                                                | Pre-OP             | D1 | D3 | D7 | D14 |
| Enrolment                                      | •                  |    |    |    |     |
| Assessment of eligibility                      | •                  |    |    |    |     |
| Randomisation                                  | •                  |    |    |    |     |
| Group A                                        |                    |    |    |    |     |
| Post-OP 1 dose of TXA                          | •                  | •  | •  | •  | •   |
| Group B                                        |                    |    |    |    |     |
| Post-OP 3 doses of TXA                         | •                  | •  | •  | •  | •   |
| HBL                                            |                    | •  | •  | •  | •   |
| haemoglobin level                              | •                  | •  | •  | •  | •   |
| Inflammatory index                             | •                  | •  | •  | •  | •   |
| inflammatory factor                            | •                  | •  | •  | •  | •   |
| coagulation index                              | •                  | •  | •  | •  | •   |
| swelling rate                                  |                    | •  | •  | •  | •   |
| DVP                                            |                    | •  | •  | •  | •   |
| PE                                             |                    | •  | •  | •  | •   |
| Postoperative complications and adverse events |                    | •  | •  | •  | •   |

OP, operative; TXA, tranexamic acid; HBL, hidden blood lose; DVP, deep vein thrombosis; PE, pulmonary embolism; D1, the 1<sup>st</sup> day after surgery; D3, the 3<sup>rd</sup> day after surgery; D7, the 7<sup>th</sup> day after surgery; D14, the 14<sup>th</sup> day after surgery.

497

498 Figure 1: The study flow diagram, including participants recruitment, eligibility,  
499 screening, randomisation, allocation concealment and outcome assessments.

500 TXA, tranexamic acid.

## Unable to Convert Image

The dimensions of this image (in pixels) are too large to be converted. For this image to convert, the total number of pixels (height x width) must be less than 40,000,000 (40 megapixels).

Figure 1: The study flow diagram, including participants recruitment, eligibility, screening, randomisation, allocation concealment and outcome assessments. TXA, tranexamic acid.

# BMJ Open

## The protocol of a single-blinded, randomized, parallel-controlled study to evaluate the effects of multiple-dose of tranexamic acid on perioperative blood loss in total knee arthroplasty in patients with rheumatoid arthritis

|                                 |                                                                                                                                                                                                                                                                                                                                                                                                                                                                                                                                                                                                                                                                                                                                                                                                                                                                                                                                                                                                                                                                                                                                                                                                                                                                                                                                                                                                                                                                                                                                                                                                                                                                                                                                                                  |
|---------------------------------|------------------------------------------------------------------------------------------------------------------------------------------------------------------------------------------------------------------------------------------------------------------------------------------------------------------------------------------------------------------------------------------------------------------------------------------------------------------------------------------------------------------------------------------------------------------------------------------------------------------------------------------------------------------------------------------------------------------------------------------------------------------------------------------------------------------------------------------------------------------------------------------------------------------------------------------------------------------------------------------------------------------------------------------------------------------------------------------------------------------------------------------------------------------------------------------------------------------------------------------------------------------------------------------------------------------------------------------------------------------------------------------------------------------------------------------------------------------------------------------------------------------------------------------------------------------------------------------------------------------------------------------------------------------------------------------------------------------------------------------------------------------|
| Journal:                        | <i>BMJ Open</i>                                                                                                                                                                                                                                                                                                                                                                                                                                                                                                                                                                                                                                                                                                                                                                                                                                                                                                                                                                                                                                                                                                                                                                                                                                                                                                                                                                                                                                                                                                                                                                                                                                                                                                                                                  |
| Manuscript ID                   | bmjopen-2019-034431.R3                                                                                                                                                                                                                                                                                                                                                                                                                                                                                                                                                                                                                                                                                                                                                                                                                                                                                                                                                                                                                                                                                                                                                                                                                                                                                                                                                                                                                                                                                                                                                                                                                                                                                                                                           |
| Article Type:                   | Protocol                                                                                                                                                                                                                                                                                                                                                                                                                                                                                                                                                                                                                                                                                                                                                                                                                                                                                                                                                                                                                                                                                                                                                                                                                                                                                                                                                                                                                                                                                                                                                                                                                                                                                                                                                         |
| Date Submitted by the Author:   | 17-Mar-2020                                                                                                                                                                                                                                                                                                                                                                                                                                                                                                                                                                                                                                                                                                                                                                                                                                                                                                                                                                                                                                                                                                                                                                                                                                                                                                                                                                                                                                                                                                                                                                                                                                                                                                                                                      |
| Complete List of Authors:       | <p>Kang, Bing-xin; Guanghua Hospital of Integrated Traditional Chinese Medicine and Western Medicine, Shanghai University of Traditional Chinese Medicine, Orthopaedics</p> <p>Xu, Hui; Guanghua Hospital of Integrated Traditional Chinese Medicine and Western Medicine, Shanghai University of Traditional Chinese Medicine, Orthopaedics</p> <p>Gao, Chen-xin; Guanghua Hospital of Integrated Traditional Chinese Medicine and Western Medicine, Shanghai University of Traditional Chinese Medicine, Orthopaedics</p> <p>Zhong, Sheng; Guanghua Hospital of Integrated Traditional Chinese Medicine and Western Medicine, Shanghai University of Traditional Chinese Medicine, Orthopaedics</p> <p>Zhang, Jing; Guanghua Hospital of Integrated Traditional Chinese Medicine and Western Medicine, Shanghai University of Traditional Chinese Medicine, Orthopaedics</p> <p>Xie, Jun; Guanghua Hospital of Integrated Traditional Chinese Medicine and Western Medicine, Shanghai University of Traditional Chinese Medicine, Orthopaedics</p> <p>Sun, Song-tao ; Guanghua Hospital of Integrated Traditional Chinese Medicine and Western Medicine, Shanghai University of Traditional Chinese Medicine, Orthopaedics</p> <p>Ma, Ying-hui; Guanghua Hospital of Integrated Traditional Chinese Medicine and Western Medicine, Shanghai University of Traditional Chinese Medicine, Orthopaedics</p> <p>Zhai, Wei-tao; Guanghua Hospital of Integrated Traditional Chinese Medicine and Western Medicine, Shanghai University of Traditional Chinese Medicine, Orthopaedics</p> <p>Xiao, Lian-bo; Guanghua Hospital of Integrated Traditional Chinese Medicine and Western Medicine, Shanghai University of Traditional Chinese Medicine, Orthopaedics</p> |
| <b>Primary Subject Heading</b>: | Medical management                                                                                                                                                                                                                                                                                                                                                                                                                                                                                                                                                                                                                                                                                                                                                                                                                                                                                                                                                                                                                                                                                                                                                                                                                                                                                                                                                                                                                                                                                                                                                                                                                                                                                                                                               |
| Secondary Subject Heading:      | Surgery                                                                                                                                                                                                                                                                                                                                                                                                                                                                                                                                                                                                                                                                                                                                                                                                                                                                                                                                                                                                                                                                                                                                                                                                                                                                                                                                                                                                                                                                                                                                                                                                                                                                                                                                                          |
| Keywords:                       | Rheumatoid arthritis, tranexamic acid, total knee arthroplasty, perioperative blood management, Knee < ORTHOPAEDIC & TRAUMA                                                                                                                                                                                                                                                                                                                                                                                                                                                                                                                                                                                                                                                                                                                                                                                                                                                                                                                                                                                                                                                                                                                                                                                                                                                                                                                                                                                                                                                                                                                                                                                                                                      |



1  
2  
3  
4  
5  
6  
7  
8  
9  
10  
11  
12  
13  
14  
15  
16  
17  
18  
19  
20  
21  
22  
23  
24  
25  
26  
27  
28  
29  
30  
31  
32  
33  
34  
35  
36  
37  
38  
39  
40  
41  
42  
43  
44  
45  
46  
47  
48  
49  
50  
51  
52  
53  
54  
55  
56  
57  
58  
59  
60

|  |                                                                 |
|--|-----------------------------------------------------------------|
|  | SURGERY, Paediatric orthopaedics < ORTHOPAEDIC & TRAUMA SURGERY |
|  |                                                                 |

SCHOLARONE™  
Manuscripts



I, the Submitting Author has the right to grant and does grant on behalf of all authors of the Work (as defined in the below author licence), an exclusive licence and/or a non-exclusive licence for contributions from authors who are: i) UK Crown employees; ii) where BMJ has agreed a CC-BY licence shall apply, and/or iii) in accordance with the terms applicable for US Federal Government officers or employees acting as part of their official duties; on a worldwide, perpetual, irrevocable, royalty-free basis to BMJ Publishing Group Ltd ("BMJ") its licensees and where the relevant Journal is co-owned by BMJ to the co-owners of the Journal, to publish the Work in this journal and any other BMJ products and to exploit all rights, as set out in our [licence](#).

The Submitting Author accepts and understands that any supply made under these terms is made by BMJ to the Submitting Author unless you are acting as an employee on behalf of your employer or a postgraduate student of an affiliated institution which is paying any applicable article publishing charge ("APC") for Open Access articles. Where the Submitting Author wishes to make the Work available on an Open Access basis (and intends to pay the relevant APC), the terms of reuse of such Open Access shall be governed by a Creative Commons licence – details of these licences and which [Creative Commons](#) licence will apply to this Work are set out in our licence referred to above.

Other than as permitted in any relevant BMJ Author's Self Archiving Policies, I confirm this Work has not been accepted for publication elsewhere, is not being considered for publication elsewhere and does not duplicate material already published. I confirm all authors consent to publication of this Work and authorise the granting of this licence.

1 **The protocol of a single-blinded, randomized, parallel-controlled study to**  
2 **evaluate the effects of multiple-dose of tranexamic acid on perioperative blood**  
3 **loss in total knee arthroplasty in patients with rheumatoid arthritis**

4 Bing-xin Kang\*, Hui Xu\*, Chen-xin Gao, Sheng Zhong, Jing Zhang, Jun Xie,  
5 Song-tao Sun, Ying-hui Ma, Wei-tao Zhai, Lian-bo Xiao

6 **Author Affiliations:**

7 Bing-xin Kang, MD, Department of Orthopaedics, Guanghua Hospital of Integrated  
8 Traditional Chinese Medicine and Western Medicine, Shanghai University of  
9 Traditional Chinese Medicine, Shanghai, China, 15738314790@163.com

10 Hui Xu, MD, Department of Orthopaedics, Guanghua Hospital of Integrated  
11 Traditional Chinese Medicine and Western Medicine, Shanghai University of  
12 Traditional Chinese Medicine, Shanghai, China, 1511911882@qq.com

13 Chen-xin Gao, MD, Department of Orthopaedics, Guanghua Hospital of Integrated  
14 Traditional Chinese Medicine and Western Medicine, Shanghai University of  
15 Traditional Chinese Medicine, Shanghai, China, 706046133@qq.com

16 Sheng Zhong, MD, Department of Orthopaedics, Guanghua Hospital of Integrated  
17 Traditional Chinese Medicine and Western Medicine, Shanghai University of  
18 Traditional Chinese Medicine, Shanghai, China, drcyan@foxmail.com

19 Jing Zhang, MD, Department of Orthopaedics, Guanghua Hospital of Integrated  
20 Traditional Chinese Medicine and Western Medicine, Shanghai University of  
21 Traditional Chinese Medicine, Shanghai, China,franksamo@126.com

22 Jun Xie, MD, Department of Orthopaedics, Guanghua Hospital of Integrated

1  
2  
3  
4 23 Traditional Chinese Medicine and Western Medicine, Shanghai University of  
5  
6  
7 24 Traditional Chinese Medicine, Shanghai, China, leoxie199@126.com  
8  
9 25 Song-tao Sun, MD, Department of Orthopaedics, Guanghua Hospital of Integrated  
10  
11  
12 26 Traditional Chinese Medicine and Western Medicine, Shanghai University of  
13  
14  
15 27 Traditional Chinese Medicine, Shanghai, China, sstever0156258@aliyun.com  
16  
17 28 Ying-hui Ma, MD, Department of Orthopaedics, Guanghua Hospital of Integrated  
18  
19  
20 29 Traditional Chinese Medicine and Western Medicine, Shanghai University of  
21  
22  
23 30 Traditional Chinese Medicine, Shanghai, China, mayinghui021@126.com  
24  
25 31 Wei-tao Zhai, MD, Department of Orthopaedics, Guanghua Hospital of Integrated  
26  
27  
28 32 Traditional Chinese Medicine and Western Medicine, Shanghai University of  
29  
30  
31 33 Traditional Chinese Medicine, Shanghai, China, 13901808309@163.com  
32  
33 34 Lian-bo Xiao, MD, Department of Orthopaedics, Guanghua Hospital of Integrated  
34  
35  
36 35 Traditional Chinese Medicine and Western Medicine, Shanghai University of  
37  
38  
39 36 Traditional Chinese Medicine, Shanghai, China, 13701888178@163.com  
40  
41 37 Bing-xin Kang and Hui Xu contributed equally to this paper.

#### 42 **Corresponding Author**

43  
44  
45 39 Lian-bo Xiao, PhD, Guanghua Hospital of Integrated Traditional Chinese Medicine  
46  
47  
48 40 and Western Medicine, Shanghai University of Traditional Chinese Medicine. NO.  
49  
50  
51 41 540 Xinhua Road, Changning District, Shanghai (CN 200052), China,  
52  
53 42 13701888178@163.com; +8613701888178  
54  
55

56 43

57  
58 44  
59  
60

1  
2  
3  
4 45 **ASBTRACT:**  
5

6 46 **Introduction** This clinical trial is designed to evaluate the effect of multiple-dose  
7  
8  
9 47 tranexamic acid (TXA) on perioperative hidden blood loss (HBL) in patients with  
10  
11  
12 48 rheumatoid osteoarthritis (RA).  
13

14 49 **Methods and analysis** A randomized, single-blinded, parallel-controlled study will  
15  
16  
17 50 be designed. RA patients (age 50-75 years) undergoing unilateral primary end-stage  
18  
19  
20 51 total knee arthroplasty (TKA) will be randomly divided into Group A or Group B.  
21  
22 52 Group A will be treated with one dose of TXA (1g; intravenous injection at the 3<sup>rd</sup>  
23  
24  
25 53 hour) and Group B with three doses (at the 3<sup>rd</sup>, 6<sup>th</sup>, and 12<sup>th</sup> hours; intravenous  
26  
27  
28 54 injection) after surgery. The primary outcomes will be evaluated with blood loss and  
29  
30  
31 55 haemoglobin level and the secondary outcomes with blood inflammatory factors,  
32  
33 56 serum inflammatory factors, and coagulation parameters.  
34

35 57 **Ethics and dissemination** This study has been approved by the ethics committee, and  
36  
37  
38 58 subsequent modifications of the protocol will be reported and approved by it. All of  
39  
40  
41 59 the participants or their authorised agents will give written informed consent before  
42  
43  
44 60 the study.

45 61 **Trial registration number** ChiCTR1900025013; Pre-results.  
46  
47

48 62 **Article Summary**  
49

50 63 Strengths and limitations of this trial  
51

52  
53 64 (1) This is the first study in China to evaluate the efficacy and safety of perioperative  
54  
55  
56 65 multiple-dose regimen of TXA after TKA in RA patients.  
57  
58  
59  
60

- 1  
2  
3  
4 66 (2) The bias of this study reduced dramatically by extensive study design which  
5  
6 67 includes proper randomization, allocation concealment and objective indicator.  
7  
8  
9 68 (3) Long-term follow-ups of some patients can only be conducted by phone.  
10  
11  
12 69 (4) The results can only be extrapolated to Chinese RA population.  
13  
14  
15  
16  
17  
18  
19  
20

## 21 72 **INTRODUCTION**

22  
23 73 Rheumatoid arthritis (RA) may be accompanied by hematological diseases, like  
24  
25 74 anemia.<sup>1</sup> The overall prevalence of RA is 0.5-1% in Europe and North America,  
26  
27 75 0.31% in France, 0.32-0.38% in China, and 0.02-0.047% in Japan.<sup>2 3</sup> Total knee  
28  
29 76 arthroplasty (TKA) is effective in treating flexion contracture and maintaining the  
30  
31 77 stability of RA knee.<sup>4</sup> About 0.005% of RA patients receive TKA, a rate that has  
32  
33 78 gradually decreased over the past decades. Even though, surgery remains the first  
34  
35 79 choice for articular deformity and pain, despite that disease-modifying antirheumatic  
36  
37 80 drugs (DMARDs) and biologics agents can manage synovitis-related symptoms in  
38  
39 81 RA patients.<sup>5</sup> The haemorrhage is a major perioperative complications of TKA.<sup>6</sup>  
40  
41  
42 82 Excessive blood loss should be replenished with allogeneic blood transfusion, but it  
43  
44 83 may cause immune complications, prolong hospitalization time and increase the  
45  
46 84 infection rate.<sup>7 8</sup> Haemoglobin has an obviously negative correlation with disease  
47  
48 85 activity in RA.<sup>9</sup> Therefore, we believe that perioperative blood management is need  
49  
50  
51  
52  
53 86 for patients with RA.

54  
55  
56  
57 87 Accounting for 50% of the total blood loss, hidden blood loss (HBL) happens as  
58  
59 88 the blood lost infiltrates into the tissue intraoperatively and postoperatively, resides in

1  
2  
3  
4 89 the knee joint cavity and gets haemolyzed.<sup>10</sup> As this blood is not involved in the blood  
5  
6  
7 90 circulation, HBL often leads to the joint swell, postoperative inflammation and pain.<sup>11</sup>  
8  
9 91 <sup>12</sup>

10  
11 92 Surgical tourniquet use, can reduce intraoperative bleeding,<sup>13</sup> provide a clear  
12  
13  
14 93 view during the surgery, and facilitate the connection between the cement, bone and  
15  
16  
17 94 joint prostheses.<sup>14</sup> However, after the release of the tourniquet, local tissue may be  
18  
19  
20 95 damaged by ischemia reperfusion injury, and fibrinolytic system activated.<sup>15 16</sup> As a  
21  
22  
23 96 consequence, peripheral blood circulation is accelerated, plasma fibrinolysis enhanced,  
24  
25  
26 97 and postoperative HBL increased.<sup>15</sup> Therefore, reducing the dissolution of fibrin can  
27  
28  
29 98 reduce postoperative HBL.<sup>17</sup>

30 99 Tranexamic acid (TXA) is a synthetic lysine derivative that can competitively  
31  
32  
33 100 inhibit the binding between plasminogen and fibrin, prevent the activation of  
34  
35  
36 101 plasminogen, and protect fibrin from degradation and dissolution by plasmin. TXA is  
37  
38  
39 102 initially used in obstetrics and gynaecology, then gradually replicated in surgeries to  
40  
41  
42 103 reduce bleeding and avoid blood transfusion rates.<sup>18 19</sup> The CRASH-2 trial has  
43  
44  
45 104 demonstrated the effectiveness and safety of TXA in reducing blood loss.<sup>20</sup> A large  
46  
47  
48 105 amount of literature has reported that TXA can significantly reduce peri-TKA blood  
49  
50  
51 106 loss.<sup>21-25</sup> Currently, TXA is recommended for perioperative blood management of  
52  
53  
54 107 TKA.<sup>26</sup> But, its efficacy and safety in RA patients undergoing TKA has been rarely  
55  
56  
57 108 reported.<sup>27</sup> TXA can be administered through oral intake, single large-dose  
58  
59  
60 109 intravenous injection, intra-articular injection, joint cavity irrigation, postoperative  
110 110 drainage tube injection, and combination use.<sup>25 28-31</sup> There is no consensus on the

1  
2  
3  
4 111 optimal dose and time of TXA administration during perioperative TKA.<sup>18 32 33</sup>  
5  
6 112 Studies have shown that fibrinolysis peaks at 6 hours and continues for approximately  
7  
8  
9 113 18 hours after TKA with tourniquets.<sup>34</sup> The half-life of TXA in plasma is 2 hours, and  
10  
11  
12 114 its concentration peaks at 1 hour after injection.<sup>35</sup> Thus, we suspect that a single dose  
13  
14 115 of TXA may not be sufficient to exert an anti-fibrinolytic. There are also studies  
15  
16  
17 116 suggesting that for patients with osteoarthritis, higher doses (within a limit) during the  
18  
19 117 perioperative period can increase the efficacy of TXA.<sup>36-38</sup> The purpose of this clinical  
20  
21  
22 118 trial is to verify the effectiveness and safety of multiple doses of TXA in reducing  
23  
24 119 perioperative blood loss in RA patients treated with TKA, hoping to find a new mode  
25  
26  
27 120 of perioperative blood management for TKA.  
28  
29  
30  
31  
32  
33  
34

## 35 123 **METHODS AND ANALYSIS**

### 36 37 124 **Study context**

38  
39  
40 125 This clinical trial will start on September 1, 2019 at the wards of Shanghai University  
41  
42 126 of Traditional Chinese Medicine Guanghua Hospital (Shanghai, China). The annual  
43  
44 127 surgical number of TKA for RA patients was about 300 in 2018. Eleven investigators  
45  
46  
47 128 include 2 senior orthopaedic surgeons (L-bX, W-tZ) with 20 years of clinical  
48  
49 129 experience and 6 orthopaedic physicians (C-xG, JZ, JX, S-sT, Y-hM and SZ), 2 data  
50  
51 130 collectors and who are also statisticians (B-xK and HX) and a nurse (X-rX). Informed  
52  
53  
54 131 consent will be obtained. The perioperative ERAS blood management programme and  
55  
56  
57 132 the trial flow chart are shown in Table 1 and Figure 1. The schedule is shown in Table  
58  
59  
60



1  
2  
3  
4 133 2.  
5  
6

7 134  
8

9 135 **Sample size calculation**  
10

11 136 This trial uses a completely randomized design, and multiple sample sizes are  
12  
13  
14 137 estimated by a previous clinical research review.<sup>25</sup> The main outcome is measured  
15  
16  
17 138 with the amount of HBL. The the overall standard deviation is  $\sigma = 250$ , and allowable  
18  
19  
20 139 error estimate is  $\delta = 200$ , both estimated by the statistical formula

21  
22  
23 140  $n_1 = n_2 = 2 \times \left[ \frac{(Z_{\alpha/2} + Z_{\beta}) / \sigma}{\delta} \right]^2$ . Considering a dropout rate of 10%, 104 subjects are required  
24  
25  
26 141 to yield a power of 90% with a significance level of 0.05.  
27  
28

29 142  
30

31 143 **Randomization and allocation concealment**  
32

33  
34 144 Patients will be randomly assigned to two groups according to at 1:1 ratio; SPSS  
35  
36 145 version 25.0 (IBM Corporation, Armonk, NY) is used to generate a random sequence  
37  
38  
39 146 containing 104 random numbers, which will be placed into an opaque envelope and  
40  
41  
42 147 put in a computer by encryption. The group data is saved by the statistician. Only the  
43  
44 148 nurse is allowed to check the enrollment and give the corresponding treatment.  
45  
46

47 149  
48

49 150 **Single-blinded design**  
50

51  
52 151 Only the nurse will be allowed to know the patients' enrollment and give them  
53  
54 152 corresponding treatment. The outcome evaluators will objectively record the patients'  
55  
56  
57 153 test results.  
58  
59

60 154

1  
2  
3  
4 155 **Eligibility criteria**  
5

6 156 The eligibility criteria are set in accordance with the “AMERICAN RHEUMATISM  
7  
8  
9 157 ASSOCIATION CRITERIA FOR RHEUMATOID ARTHRITIS” from the American  
10  
11  
12 158 Journal of Rheumatism (revised in 1978),<sup>39</sup> and the 2010 “ACR/EULAR classification  
13  
14 159 criteria for rheumatoid arthritis”.<sup>40</sup> (1) The patient is diagnosed with RA in Stage III  
15  
16  
17 160 or IV according to the Kellgren-Lawrence<sup>41</sup> classification; (2) The patient is 50 to 75  
18  
19  
20 161 years old; (3) The patient will undergo the unilateral primary TKA; (4) The patient  
21  
22 162 will receive perioperative anti-fibrinolytic TXA therapy; and (5) The patient will  
23  
24  
25 163 show normal blood-clotting function and no preoperative anaemia.  
26  
27  
28 164

29  
30 165 **Exclusion criteria**  
31

32 166 (1) Other types of arthritis (such as primary arthritis, post-traumatic osteoarthritis,  
33  
34 167 gouty osteoarthritis, haemophilic osteoarthritis, and tuberculous arthritis); (2) Bilateral  
35  
36  
37 168 knee arthroplasty (RA patients); (3) Severe cardiovascular disease (such as  
38  
39  
40 169 myocardial infarction, atrial fibrillation, angina pectoris, and heart failure) or  
41  
42  
43 170 cerebrovascular disease (cerebral infarction and cerebral haemorrhage); and (4)  
44  
45 171 Prolonged use of oral anticoagulant drugs (such as aspirin, warfarin, and clopidogrel).  
46  
47

48 172

49  
50 173 **Elimination criteria**  
51

52  
53 174 (1) Acquired color vision disorder; (2) Active intravascular coagulation patients; and  
54  
55  
56 175 (3) a history of convulsions.  
57

58 176  
59  
60

1  
2  
3  
4 177 **Termination criteria**

5  
6 178 (1) Shock; (2) Allergic symptoms, such as itching and a rash; (3) Digestive disorders,  
7  
8  
9 179 such as nausea, vomiting, loss of appetite, and diarrhoea after medication; (4)  
10  
11 180 Reactive dermatitis, dizziness, hypotension, drowsiness, headache; convulsions,  
12  
13  
14 181 visual impairment, and others; and (5) Adverse events, such as intracranial thrombosis  
15  
16  
17 182 and intracranial haemorrhage after medication.  
18  
19  
20 183

21  
22 184 **Perioperative anti-rheumatic treatment**

23  
24 185 Methotrexate and hydroxychloroquine will be used during the perioperative period.  
25  
26  
27 186 Leflunomide will be discontinued at one week before surgery. Use of other  
28  
29  
30 187 disease-modifying antirheumatic drugs (DMARDs) will be discontinued two days  
31  
32 188 before surgery, and restarted at 1-2 days after gastrointestinal function recovery. The  
33  
34  
35 189 use of newer biologic agents targeting tumor necrosis (TNF- $\alpha$ ) will be discontinued  
36  
37  
38 190 for 4 to 5 half-lives before surgery and restarted after wound healing and infection  
39  
40 191 elimination.<sup>42 43</sup>

41  
42  
43 192  
44  
45 193 **Surgery and anesthesia**

46  
47  
48 194 Surgery will be performed by two senior surgeons (L-bX and W-tZ). The operations  
49  
50  
51 195 will be conducted under general anaesthesia. A median incision (14-17 cm long) is cut  
52  
53 196 in the knee joint with a medial paramedian support band. Internal positioning is used  
54  
55  
56 197 for femoral bone marrow and external positioning for tibial bone marrow. All patients  
57  
58 198 will use a tourniquet with a pressure of 230-250 mmHg. During the operation, blood  
59  
60

1  
2  
3  
4 199 pressure will be reduced to 20% of the basal level through a suction drainage tube,  
5  
6  
7 200 and limb surgery will be conducted with an elastic bandage. During the operation,  
8  
9  
10 201 conventional anti-infective, combined analgesic, anti-inflammatory, and  
11  
12 202 anti-coagulation treatment and other symptomatic treatments will be administered  
13  
14 203 according to the "Chinese Hip and Total Knee Arthroplasty Surgery Perioperative  
15  
16  
17 204 Anti-fibrinolytic Drug Sequential Anticoagulant Application Programme Expert  
18  
19  
20 205 Consensus". Ten minutes before the incision, 1 g of TXA + 100 mL of  
21  
22 206 intravenous-saline and 1.5 g of TXA + 50 mL articular-injection saline will be  
23  
24  
25 207 administered preoperatively in the sutured joint cavity.

26  
27 208 TXA is produced by Hunan Dongting Pharmaceutical Co., Ltd., and used  
28  
29  
30 209 according to the second edition of 2015 Chinese Pharmacopoeia and Drug  
31  
32  
33 210 Supplement Application Approval (2013B02016), YBH07372010; the approval  
34  
35  
36 211 number is National Drug Standard H43020565.  
37  
38  
39

#### 40 213 **Intraoperative blood loss**

41  
42  
43 214 The amount of intraoperative blood loss = the total volume of fluid in the negative  
44  
45  
46 215 pressure drain - the volume of normal saline.  
47

48 216

#### 49 50 217 **Study interventions**

51  
52  
53 218 Group A: 1 g of TXA + 100 mL of physiological saline will be injected intravenously  
54  
55  
56 219 at the 3<sup>rd</sup> hour after the operation. Group B: 1 g of TXA + 100 mL of physiological  
57  
58  
59 220 saline is intravenously instilled at the 3<sup>rd</sup>, 6<sup>th</sup>, and 12<sup>th</sup> hours after the operation.  
60

1  
2  
3 221  
45 222 **Pain management and rehabilitation**

6  
7  
8 223 A cocktail injection will be given during the operation, and 0.2 g of oral celecoxib  
9  
10  
11 224 after surgery for analgesia. After anaesthesia the maximum angles of flexion and  
12  
13  
14 225 extension of the ankle will be maintained for 6 seconds, and the foot is relaxed for 5  
15  
16  
17 226 seconds; the quadriceps contractions are equal between the two sides. At the first  
18  
19 227 postoperative day, the patients will exercise straight-leg-raise, supine-knee-flexion  
20  
21  
22 228 and knee flexion and extension in sitting; the machine-assisted exercises will begin on  
23  
24 229 the third day after surgery, such as continuous passive motion.  
25

26 230

27  
28 231 **Antibiotics**

29  
30 232 For perioperative prophylaxis, cefazolin sodium antibiotics are administered at 30  
31  
32  
33 233 minutes before surgery, and 24-48 hours after surgery.  
34

35 234

36  
37 235 **Prevention of lower extremity venous thrombosis**

38  
39  
40 236 Six hours after the surgery, perioperative enoxaparin sodium (60mg, once a day for 14  
41  
42  
43 237 days) is injected for preventing deep vein thrombosis.  
44

45 238

46  
47 239 **Outcomes**

48  
49  
50 240 Primary outcomes

51  
52  
53 241 *The blood lose, haemoglobin level*

54  
55 242 The blood loss is calculated according to the formula by Nadle<sup>44</sup> and Gross formula:<sup>45</sup>

56  
57  
58 243 Patient's blood volume (PBV) = K1 × height<sup>3</sup> (m<sup>3</sup>) + K2 × weight (kg) + K3 (Male:  
59  
60

1  
2  
3  
4 244  $K1 = 0.3669, K2 = 0.03219, K3 = 0.6041$ . Female:  $K1 = 0.3561, K2 = 0.03308, K3 =$   
5  
6 245  $0.1833$ ). Total blood loss (TBL) =  $PBV \times (Hct_{pre} - Hct_{post})$ . HBL =  $PBV \times (Hct_{pre} -$   
7  
8  
9 246  $Hct_{post}) / Hct_{ave}$ . Preoperatively, at the 1<sup>st</sup>, 3<sup>rd</sup>, 7<sup>th</sup> and 14<sup>th</sup> days after surgery, we will  
10  
11  
12 247 calculate the HBL based on the value of haematocrit and recorded the count of  
13  
14 248 haemoglobin.

15  
16  
17 249  
18  
19 250 Secondary outcomes

20  
21 251 *Inflammatory index, inflammatory factor and coagulation index*

22  
23  
24 252 Preoperatively, at the 1<sup>st</sup>, 3<sup>rd</sup>, 7<sup>th</sup> and 14<sup>th</sup> days after surgery, we will record the  
25  
26  
27 253 erythrocyte sedimentation rate (ESR) and C-reactive protein (CRP) in the whole  
28  
29  
30 254 blood and interleukin 6 (IL-6), interleukin 12 (IL-12), and TNF- $\alpha$  in the plasma.  
31  
32 255 Whole blood test indicators and plasma inflammatory factors will be assessed in the  
33  
34  
35 256 participating hospital (Department of Clinical Laboratory of Guanghua Hospital of  
36  
37 257 Integrated Traditional Chinese Medicine and Western Medicine). The indicators and  
38  
39  
40 258 factors will be tested by an inspector who is not involved in this clinical trial.

41  
42  
43 259  
44  
45 260 *Knee function and swelling*

46  
47  
48 261 Knee function will be measured using the American Keen Society Score (AKSS) at  
49  
50  
51 262 one day before surgery and at the 3<sup>rd</sup>, 7<sup>th</sup> and 14<sup>th</sup> days after surgery. A trained  
52  
53  
54 263 researcher will educate all patients until they fully know how to assess their knee  
55  
56  
57 264 function through the questionnaires. The rate of swelling is defined as the  
58  
59  
60 265 postoperative circumference of the upper tibia divide by the preoperative

1  
2  
3  
4 266 circumference of the upper tibia.  
5

6  
7 267  
8

9 268 *Adverse events*

10  
11 269 Adverse events include (1) Deep vein thrombosis<sup>46</sup> (acute onset, affected limb  
12  
13  
14 270 swelling, sever pain, or significant tenderness at the femoral triangle or/and leg); (2)  
15  
16  
17 271 Extensive swelling on the affected limb; (3) A dull red color and a rise in the skin of  
18  
19  
20 272 the affected limb; (4) Generalized shallow venous tension on the affected limb; (5) In  
21  
22  
23 273 the skin of the affected limb; (6) Pulmonary embolism diagnosed by Doppler  
24  
25 274 ultrasound and venography (clinical manifestations: cough, chest tightness,  
26  
27 275 palpitations, haemoptysis, shortness of breath, dizziness, shock, cyanosis, increased  
28  
29  
30 276 respiratory rate, arteriovenous filling or pulsation, etc.) and pulmonary embolism  
31  
32  
33 277 diagnosed by CT. The wound healing process and complications<sup>47</sup> (wound bleeding,  
34  
35 278 haematoma, wound infection, and deep infection) will be observed and recorded in  
36  
37  
38 279 the patient's case report forms (CRFs) during hospitalization and follow-ups. Wound  
39  
40  
41 280 exudation is defined as the presence of exudation from the wound even 48 hours after  
42  
43 281 surgery.  
44

45  
46 282  
47

48 283 *Adverse event treatment*

49  
50 284 Adverse events during the follow-up will be recorded in the CRFs, and their relevance  
51  
52 285 to drug use will be evaluated. All the adverse events will be classified in accordance  
53  
54 286 with the five-level scoring systems (5.0) of the CTCAE. Serious adverse events are  
55  
56  
57 287 defined as those that may cause cancer, defects, teratogenicity, death, and permanent  
58  
59 288 damage to organ function, permanent or significant disability, and prolonged hospital  
60

1  
2  
3 289 stay. In any event, the researcher should immediately take appropriate measures and  
4  
5 290 report it to the hospital and ethics committees within 24 hours.  
6  
7

8 291

### 9 292 **Data management**

10 293 Data on the CRFs will be put in the computer by two independent trained research  
11  
12 294 assistants with a double-entry method. The hospital's independent investigators will  
13  
14 295 check the data periodically.  
15  
16  
17  
18

19 296

### 20 297 **Statistical analysis**

21 298 (1) Descriptive analysis on the characteristics of the study participants; (2) Balance  
22  
23 299 analysis on the baseline values in groups; (3) Comparison of the balance between  
24  
25 300 groups of primary outcomes; and (4) Comparison of secondary outcomes and safety  
26  
27 301 between groups. The total rate of adverse events of the two groups are tested by  
28  
29 302 bidirectional disordered R\*C list chi-square test. The association between the  
30  
31 303 incidence of adverse events and the dose of TXA used is described.  
32  
33  
34  
35  
36  
37

38 304

### 39 40 41 42 43 44 45 46 47 48 49 50 51 52 53 54 55 56 57 58 59 60 305 **Ethics and dissemination**

306 Written inform consent will be obtained from all participants or their authorised  
307 agents before the study. All TXA treatments will be free. Research data will be kept  
308 strictly confidential and obtained from appropriate authors upon reasonable request.  
309 Results of the trial will be published on the website of the China Clinical Trials  
310 Registry and in peer-reviewed journals.

311

### 312 **The Patient and public involvement**



1  
2  
3  
4 313 Patients and public will not be involved in the development of the research question  
5  
6 314 or in the design of the study. Patients will receive oral and written information about  
7  
8  
9 315 this trial, pertaining to the benefits, risks and discomforts that they may get from the  
10  
11  
12 316 study. Besides, the burden of the intervention will be assessed by patients themselves.  
13  
14 317 Dissemination of the general results (no personal data) will be made on demand.  
15  
16

17 318

18  
19  
20  
21 319

## 22 23 24 320 **DISCUSSION**

25  
26  
27  
28 321 Controlling blood loss can facilitate the recovery from TKA surgery. Previous clinical  
29  
30 322 studies have shown that high dose of TXA can reduce blood loss after TKA in  
31  
32 323 patients with osteoarthritis.<sup>25 47 48</sup> Based on previous research,<sup>25</sup> we will set the  
33  
34 324 patient's age between 50-75 to improve the quality of study. In this trial, we will  
35  
36 325 exclude patients with a large number of intravenous infusions to eliminate the effect  
37  
38 326 of blood dilution on the results. We will use a tourniquet to minimize the blood loss  
39  
40  
41 327 during the operation. Therefore, what we will observed is the blood loss after the  
42  
43 328 removal of tourniquet.<sup>10</sup> It has been reported that intravenous infusion combined with  
44  
45 329 intra-articular injection of TXA may be the optimal bleeding-control scheme.<sup>49 50</sup>  
46  
47  
48 330 Previous studies have shown that knee joint swelling after TKA is associated with  
49  
50 331 HBL in the joint cavity. TXA can reduce postoperative HBL, thereby relieving the  
51  
52 332 swelling around the joint.<sup>51</sup> Given that plasminogen activators play an important role  
53  
54 333 in RA-involved inflammation, the dissolution of fibrin will trigger an inflammatory  
55  
56  
57  
58  
59  
60

1  
2  
3  
4 334 response.<sup>52</sup> Therefore, we suspect that multiple doses of TXA in the perioperative  
5  
6  
7 335 period may exert an auxiliary anti-inflammatory effect.  
8

9 336 This study will provide new evidence for managing perioperative HBL in TKA  
10  
11 337 in Chinese RA patients.  
12  
13  
14 338  
15  
16 339

17  
18  
19 340 **Author Contributions** B-xK, HX and L-bX conceived the study while B-xK and HX  
20  
21  
22 341 drafted the study protocol, B-xK and HX contributed equally to this work and should  
23  
24  
25 342 be regarded as co-first authors. The study protocol was designed by C-xG, SZ, JZ, JX,  
26  
27  
28 343 S-tS, Y-hM, and W-tZ. All authors approved the final manuscript of this study  
29  
30 344 protocol.  
31

32 345 **Funding** This work will be supported by the Foundation of Health and Family  
33  
34 346 planning Commission of Shanghai (Grant NO. ZY (2018-2020)-FWTX-6023).  
35

36 347 **Conflicts of Interests** The authors declared that there are no potential conflicts of  
37  
38  
39 348 interest with respect to the research, authorship, and/or publication of this study.  
40

41 349 **Patient consent for publication** Obtained.  
42  
43

44 350 **Ethics approval** This study has been approved by the ethics committee Shanghai  
45  
46  
47 351 Guanghua Hospital of Integrated Traditional Chinese Medicine and Western  
48  
49  
50 352 Medicine (approval NO. 2019-K-13), and any modification of the protocol will be  
51  
52  
53 353 reported and approved by it.  
54

55 354 **Provenance and peer review** Not commissioned; externally peer reviewed.  
56  
57 355  
58  
59  
60 356

357 **REFERENCES**

- 358 1. Goyal L, Shah PJ, Yadav RN, *et al.* Anaemia in newly diagnosed patients of rheumatoid  
359 arthritis and its correlation with disease activity. *J Assoc Physicians India* 2018;66:26-9.
- 360 2. Minichiello E, Semerano L, Boissier MC. Time trends in the incidence, prevalence, and  
361 severity of rheumatoid arthritis: A systematic literature review. *Jt Bone Spine*  
362 2016;83:625-30.
- 363 3. Shichikawa K, Inoue K, Hirota S, *et al.* Changes in the incidence and prevalence of  
364 rheumatoid arthritis in Kamitonda, Wakayama, Japan, 1965-1996. *Ann Rheum Dis*  
365 1999;58:751-6.
- 366 4. Yan D, Yang J, Pei F. Total knee arthroplasty treatment of rheumatoid arthritis with severe  
367 versus moderate flexion contracture. *Journal of orthopaedic surgery and research* 2013;8:41.
- 368 5. Louie GH, Ward MM. Changes in the rates of joint surgery among patients with rheumatoid  
369 arthritis in California, 1983–2007. *Annals of the rheumatic diseases* 2011;69:868-71.
- 370 6. Ker K, Roberts I. Tranexamic acid for surgical bleeding. *BMJ* 2014;349:10-1.
- 371 7. Freedman J, Luke K, Escobar M, *et al.* Experience of a network of transfusion coordinators  
372 for blood conservation (Ontario Transfusion Coordinators [ONTraC] ). *Transfusion*  
373 2008;48:237-50.
- 374 8. Mc Cormack PL. Tranexamic Acid: A review of its use in the treatment of hyperfibrinolysis.  
375 *Drugs* 2012;72:585-617.
- 376 9. Padjen I, Öhler L, Studenic P, *et al.* Clinical meaning and implications of serum hemoglobin  
377 levels in patients with rheumatoid arthritis. *Semin Arthritis Rheum* 2017;47:193-8.
- 378 10. Sehat KR, Evans R, Newman JH. How much blood is really lost in total knee arthroplasty?  
379 Correct blood loss management should take hidden loss into account. *The Knee*  
380 2000;7:151-5.
- 381 11. Ishida K, Tsumura N, Kitagawa A, *et al.* Intra-articular injection of tranexamic acid reduces  
382 not only blood loss but also knee joint swelling after total knee arthroplasty. *International*  
383 *orthopaedics* 2011;35:1639-1645.
- 384 12. Liu X, Zhang X, Chen Y, *et al.* Hidden blood loss after total hip arthroplasty. *The Journal of*  
385 *arthroplasty* 2011, 26:1100-1105.

- 1  
2  
3  
4 386 13. Tarwala R, Dorr LD, Gilbert PK, *et al.* Tourniquet use during cementation only during total  
5  
6 387 knee arthroplasty: A randomized trial knee. *Clin Orthop Relat Res* 2014;472:169-74.  
7  
8 388 14. Hsu KL, Chang CW, Yang CY, *et al.* Tourniquet Use in Total Knee Arthroplasty. *Prim*  
9  
10 389 *Total Knee Arthroplast* Published Online First:2018.  
11  
12 390 15. Schnettler T, Papillon N, Rees H. Use of a Tourniquet in Total Knee Arthroplasty Causes a  
13  
14 391 Paradoxical Increase in Total Blood Loss. *J Bone Jt Surg- Am Vol* 2017;99:1331-6.  
15  
16 392 16. Aglietti P, Baldini A, Vena LM, *et al.* Effect of tourniquet use on activation of coagulation  
17  
18 393 in total knee replacement. *Clin Orthop Relat Res* 2000;371:169-77.  
19  
20 394 17. Benoni G, Lethagen S, Fredin H. The effect of tranexamic acid on local and plasma  
21  
22 395 fibrinolysis during total knee arthroplasty. *Thromb Res* 1997;85:195-206.  
23  
24 396 18. Jennings JD, Solarz MK, Haydel C. Application of Tranexamic Acid in Trauma and  
25  
26 397 Orthopedic Surgery. *Orthop Clin North Am* 2016;47:137-43.  
27  
28 398 19. Napolitano LM, Cohen MJ, Cotton BA, *et al.* Tranexamic acid in trauma. *J Trauma Acute*  
29  
30 399 *Care Surg* 2013;74:1575-86.  
31  
32 400 20. Shakur H, Roberts I, Bautista R, *et al.* CRASH-2 trial collaborators. Effects of tranexamic  
33  
34 401 acid on death, vascular occlusive events, and blood transfusion in trauma patients with  
35  
36 402 significant haemorrhage (CRASH-2) : a randomised, placebo-controlled trial. *Lancet*  
37  
38 403 2010;376:23-32.  
39  
40 404 21. Adravanti P, Di Salvo E, Calafiore G, *et al.* A prospective, randomized, comparative study  
41  
42 405 of intravenous alone and combined intravenous and intraarticular administration of  
43  
44 406 tranexamic acid in primary total knee replacement. *Arthroplast Today* 2018;4:85-8.  
45  
46 407 22. Prakash J, Seon JK, Park YJ, *et al.* A randomized control trial to evaluate the effectiveness  
47  
48 408 of intravenous, intraarticular and topical wash regimes of tranexamic acid in primary total  
49  
50 409 knee arthroplasty. *J Orthop Surg* 2017;25:1-7.  
51  
52 410 23. Mao Z, Yue B, Wang Y, *et al.* A comparative, retrospective study of peri-articular and  
53  
54 411 intra-articular injection of tranexamic acid for the management of postoperative blood loss  
55  
56 412 after total knee arthroplasty. *BMC Musculoskelet Disord* 2016;17:1-8.  
57  
58 413 24. Jansen JA, Lameijer JRC, Snoeker BAM. Combined intravenous, topical and oral  
59  
60 414 tranexamic acid administration in total knee replacement: Evaluation of safety in patients  
415 with previous thromboembolism and effect on hemoglobin level and transfusion rate. *The*

- 1  
2  
3  
4 416 *Knee* 2017;24:1206-12.
- 5  
6 417 25. Lei Y, Xie J, Xu B, *et al.* The efficacy and safety of multiple-dose intravenous tranexamic  
7  
8 418 acid on blood loss following total knee arthroplasty: a randomized controlled trial. *Int Orthop*  
9  
10 419 2017;41:2053-9.
- 11  
12 420 26. Zhen Y, Zongke Z, Fuxing P, *et al.* An expert consensus on the application of an  
13  
14 421 anti-fibrinolytic anticoagulant drug during the perioperative period following hip and knee  
15  
16 422 joint replacement in China. *Chinese Journal of Bone and Joint Surgery* 2015;8:281-5.
- 17  
18 423 27. Xie J, Hu Q, Huang Z, *et al.* Comparison of three routes of administration of tranexamic acid  
19  
20 424 in primary unilateral total knee arthroplasty: Analysis of a national database. *Thromb Res*  
21  
22 425 2019;173:96-101.
- 23  
24 426 28. Hu WH. Efficacy of intravenous versus topical administration of tranexamic acid in  
25  
26 427 primary total knee arthroplasty. *Chinese J Tissue Eng Res* 2018;22:356-61.
- 27  
28 428 29. Yue C, Kang P, Yang P, *et al.* Topical application of tranexamic acid in primary total hip  
29  
30 429 arthroplasty: A randomized double-blind controlled trial. *J Arthroplasty* 2014;29:2452-6.
- 31  
32 430 30. Liu W, Yang C, Huang X, *et al.* Tranexamic Acid Reduces Occult Blood Loss, Blood  
33  
34 431 Transfusion, and Improves Recovery of Knee Function after Total Knee Arthroplasty: A  
35  
36 432 Comparative Study. *J Knee Surg* 2018;31:239-46.
- 37  
38 433 31. Yang Y, Lv YM, Ding PJ, *et al.* The reduction in blood loss with intra-articular injection of  
39  
40 434 tranexamic acid in unilateral total knee arthroplasty without operative drains: A randomized  
41  
42 435 controlled trial. *Eur J Orthop Surg Traumatol* 2015;25:135-9.
- 43  
44 436 32. Young B, Moondi P. A questionnaire-based survey investigating the current use of  
45  
46 437 tranexamic acid in traumatic haemorrhage and elective hip and knee arthroplasty. *JRSM*  
47  
48 438 *Open* 2014;5:204253331351694.
- 49  
50 439 33. Cid J, Lozano M. Tranexamic acid reduces allogeneic red cell transfusions in patients  
51  
52 440 undergoing total knee arthroplasty: Results of a meta-analysis of randomized controlled trials.  
53  
54 441 *Transfusion* 2005;45:1302-7.
- 55  
56 442 34. Blanié A, Bellamy L, Rhayem Y, *et al.* Duration of postoperative fibrinolysis after total hip  
57  
58 443 or knee replacement: A laboratory follow-up study. *Thromb Res* 2013;131:e6-11.
- 59  
60 444 35. Hunt BJ. The current place of tranexamic acid in the management of bleeding. *Anaesthesia*  
445 2015;70:e18-53.

- 1  
2  
3  
4 446 36. Qiang P, Hong W, Xuan-ming LI, *et al.* Effects of High Doses of Tranexamic Acid on the  
5 447 Fibrinolytic Activity and Inflammatory Response of Patients undergoing Total Knee  
6 448 Arthroplasty \*. *Progress in Modern Biomedicine* 2018;18:3319-22.
- 9 449 37. Demos HA, Lin ZX, Barfield WR, *et al.* Process Improvement Project Using Tranexamic  
11 450 Acid Is Cost-Effective in Reducing Blood Loss and Transfusions After Total Hip and Total  
12 451 Knee Arthroplasty. *J Arthroplasty* 2017;32:2375-80.
- 15 452 38. Tang Y, Wen Y, Li W, *et al.* The efficacy and safety of multiple doses of oral tranexamic  
17 453 acid on blood loss, inflammatory and fibrinolysis response following total knee arthroplasty:  
18 454 A randomized controlled trial. *Int J Surg* 2019;65:45-51.
- 21 455 39. SILMAN, A J . THE 1987 REVISED AMERICAN RHEUMATISM ASSOCIATION  
22 456 CRITERIA FOR RHEUMATOID ARTHRITIS. *Rheumatology* 1988;27:341-3.
- 25 457 40. Britsemmer K, Ursum J, Gerritsen M, *et al.* Validation of the 2010 ACR/EULAR  
27 458 classification criteria for rheumatoid arthritis: Slight improvement over the 1987 ACR  
28 459 criteria. *Ann Rheum Dis* 2011;70:1468-70.
- 31 460 41. Kohn MD, Sassoos AA, Fernando ND. Classifications in Brief: Kellgren-Lawrence  
32 461 Classification of Osteoarthritis. *Clin Orthop Relat Res* 2016;474:1886-93.
- 35 462 42. Krause ML, Matteson EL. Perioperative management of the patient with rheumatoid  
36 463 arthritis. *World J Orthop* 2014;5:283-91.
- 38 464 43. Thorsness RJ, Hammert WC. Perioperative management of rheumatoid medications. *J Hand*  
40 465 *Surg Am* 2012;37:1928-31.
- 42 466 44. Nadler SB, Hidalgo JH, Bloch T. Prediction of blood volume in normal human adults.  
44 467 *Surgery* 1962;51:224-32.
- 46 468 45. Gross JB. Estimating allowable blood loss: Corrected for dilution. *Anesthesiology*  
48 469 1983;58:277-280.
- 50 470 46. Lee JT. Commentary on the “Guideline for Prevention of Surgical Site Infection, 1999”.  
51 471 *American Journal of Infection Control* 1999;27:96.
- 54 472 47. Park JH, Choi SW, Shin EH, *et al.* The optimal protocol to reduce blood loss and blood  
55 473 transfusion after unilateral total knee replacement: Low-dose IA-TXA plus 30-min drain  
56 474 clamping versus drainage clamping for the first 3 h without IA-TXA. *J Orthop Surg*  
57 475 2017;25:1-7.

- 1  
2  
3  
4 476 48. Voorn VM, Marang-van de Mheen PJ, van der Hout A, *et al.* The effectiveness of a  
5  
6 477 de-implementation strategy to reduce low-value blood management techniques in primary hip  
7  
8 478 and knee arthroplasty: a pragmatic cluster-randomized controlled trial. *Implement Science*  
9  
10 479 2017;12:72.
- 11 480 49. Mi B, Liu G, Lv H, *et al.* Is combined use of intravenous and intraarticular tranexamic acid  
12  
13 481 superior to intravenous or intraarticular tranexamic acid alone in total knee arthroplasty? A  
14  
15 482 meta-analysis of randomized controlled trials. *J Orthop Surg Res* 2017;12:1-9.
- 16  
17 483 50. Iseki T, Tsukada S, Wakui M, *et al.* Intravenous tranexamic acid only versus combined  
18  
19 484 intravenous and intra-articular tranexamic acid for perioperative blood loss in patients  
20  
21 485 undergoing total knee arthroplasty. *Eur J Orthop Surg Traumatol* 2018;28:1397-402.
- 22  
23 486 51. Ishida K, Tsumura N, Kitagawa A, *et al.* Intra-articular injection of tranexamic acid reduces  
24  
25 487 not only blood loss but also knee joint swelling after total knee arthroplasty. *Int Orthop*  
26  
27 488 2011;35:1639-45.
- 28  
29 489 52. Li J, Ny A, Leonardsson G, *et al.* The plasminogen activator/plasmin system is essential for  
30  
31 490 development of the joint inflammatory phase of collagen type II-induced arthritis. *Am J*  
32  
33 491 *Pathol* 2005;166:783-92.
- 34  
35 492

**Table 1** Enhanced recovery after surgery blood management

Preoperative

1 Treatment of hemorrhagic primary disease

2 Nutritional guidance, balanced diet

3 Iron application

4 Rhu-Epo application

Intraoperative

5 Minimally invasive surgery

6 Tourniquet optimization

7 Controlled buck

8 Autologous blood return

9 Use of tranexamic acid

1  
2  
3  
4  
5  
6  
7  
8  
9  
10  
11  
12  
13  
14  
15  
16  
17  
18  
19  
20  
21  
22  
23  
24  
25  
26  
27  
28  
29  
30  
31  
32  
33  
34  
35  
36  
37  
38  
39  
40  
41  
42  
43  
44  
45  
46  
47

Postoperative

10 Reduce bleeding (pressure dressing of wounds, prevent stress ulcers)

11 Nutritional support, iron supplementation, use of Rhu-Epo

Rhu-Epo, recombinant human erythropoietin.

493

14 **Table 2** The schedule of trial enrolment, interventions and assessments

|                                                | Outcome assessment |    |    |    |     |
|------------------------------------------------|--------------------|----|----|----|-----|
|                                                | Pre-OP             | D1 | D3 | D7 | D14 |
| Enrolment                                      | •                  |    |    |    |     |
| Assessment of eligibility                      | •                  |    |    |    |     |
| Randomisation                                  | •                  |    |    |    |     |
| Group A                                        |                    |    |    |    |     |
| Post-OP 1 dose of TXA                          | •                  | •  | •  | •  | •   |
| Group B                                        |                    |    |    |    |     |
| Post-OP 3 doses of TXA                         | •                  | •  | •  | •  | •   |
| HBL                                            |                    | •  | •  | •  | •   |
| Haemoglobin level                              | •                  | •  | •  | •  | •   |
| Inflammatory index                             | •                  | •  | •  | •  | •   |
| Inflammatory factor                            | •                  | •  | •  | •  | •   |
| Coagulation index                              | •                  | •  | •  | •  | •   |
| Swelling rate                                  |                    | •  | •  | •  | •   |
| DVT                                            |                    | •  | •  | •  | •   |
| PE                                             |                    | •  | •  | •  | •   |
| Postoperative complications and adverse events |                    | •  | •  | •  | •   |

48 OP, operative; TXA, tranexamic acid; HBL, hidden blood lose; DVT, deep vein  
49 thrombosis; PE, pulmonary embolism; D1, the 1<sup>st</sup> day after surgery; D3, the 3<sup>rd</sup> day  
50 after surgery; D7, the 7<sup>th</sup> day after surgery; D14, the 14<sup>th</sup> day after surgery.

52  
53  
54  
55  
56  
57  
58  
59  
60

494

495 Figure 1: The study flow diagram, including participants recruitment, eligibility,  
496 screening, randomisation, allocation concealment and outcome assessments. TXA,



1  
2  
3  
4  
5  
6  
7  
8  
9  
10  
11  
12  
13  
14  
15  
16  
17  
18  
19  
20  
21  
22  
23  
24  
25  
26  
27  
28  
29  
30  
31  
32  
33  
34  
35  
36  
37  
38  
39  
40  
41  
42  
43  
44  
45  
46  
47  
48  
49  
50  
51  
52  
53  
54  
55  
56  
57  
58  
59  
60

497 tranexamic acid; D1, the 1<sup>st</sup> day after surgery; D3, the 3<sup>rd</sup> day after surgery; D7, the 7<sup>th</sup>  
498 day after surgery; D14, the 14<sup>th</sup> day after surgery.  
499

For peer review only

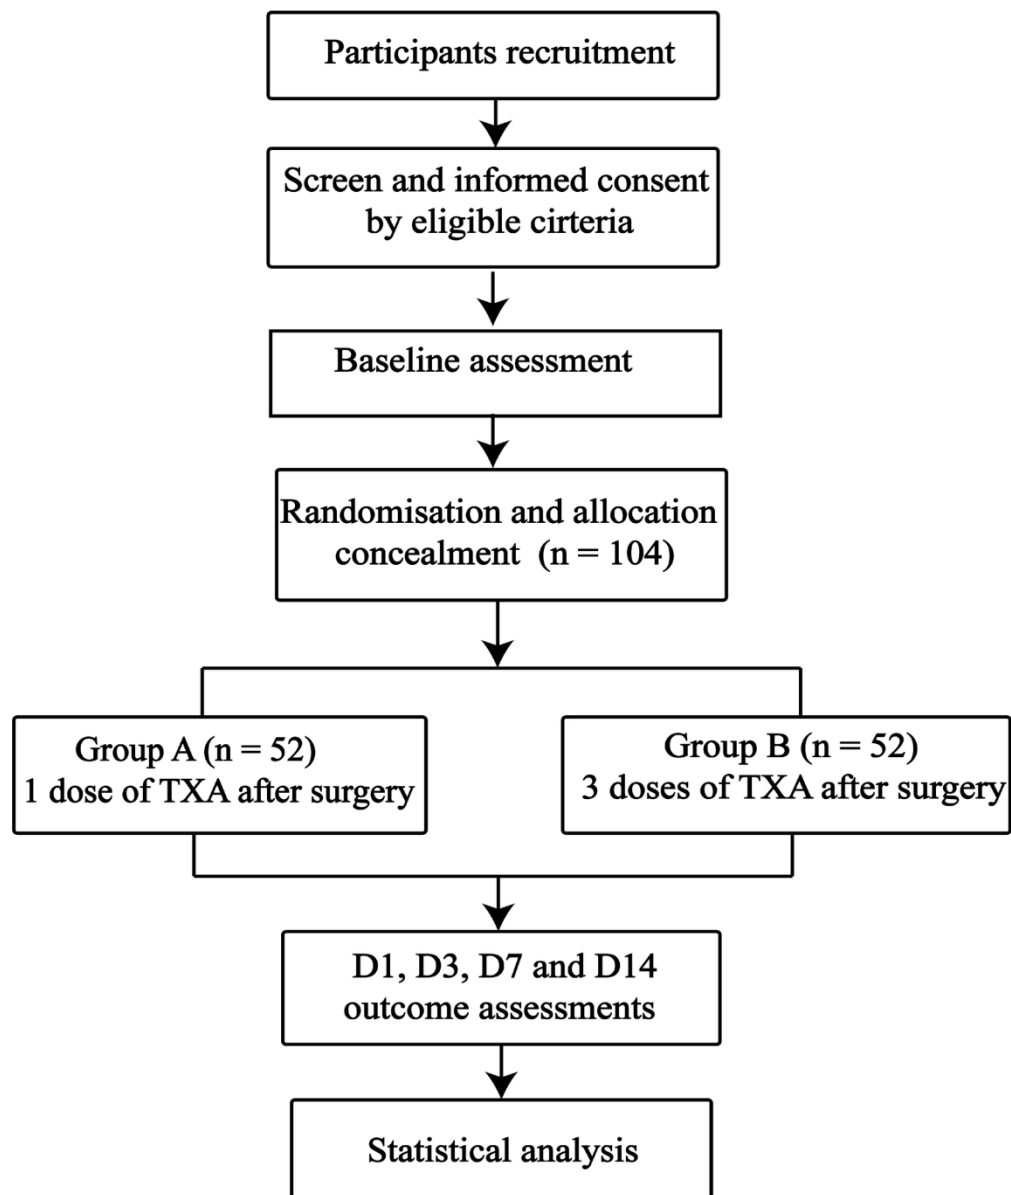

Figure 1: The study flow diagram, including participants recruitment, eligibility, screening, randomisation, allocation concealment and outcome assessments. TXA, tranexamic acid; D1, the 1st day after surgery; D3, the 3rd day after surgery; D7, the 7th day after surgery; D14, the 14th day after surgery.

163x195mm (300 x 300 DPI)

# BMJ Open

## Multiple-dose tranexamic acid for perioperative blood loss in total knee arthroplasty in patients with rheumatoid arthritis : A single-blinded, randomized, parallel-controlled study protocol

|                                 |                                                                                                                                                                                                                                                                                                                                                                                                                                                                                                                                                                                                                                                                                                                                                                                                                                                                                                                                                                                                                                                                                                                                                                                                                                                                                                                                                                                                                                                                                                                                                                                                                                                                                                                                                                  |
|---------------------------------|------------------------------------------------------------------------------------------------------------------------------------------------------------------------------------------------------------------------------------------------------------------------------------------------------------------------------------------------------------------------------------------------------------------------------------------------------------------------------------------------------------------------------------------------------------------------------------------------------------------------------------------------------------------------------------------------------------------------------------------------------------------------------------------------------------------------------------------------------------------------------------------------------------------------------------------------------------------------------------------------------------------------------------------------------------------------------------------------------------------------------------------------------------------------------------------------------------------------------------------------------------------------------------------------------------------------------------------------------------------------------------------------------------------------------------------------------------------------------------------------------------------------------------------------------------------------------------------------------------------------------------------------------------------------------------------------------------------------------------------------------------------|
| Journal:                        | <i>BMJ Open</i>                                                                                                                                                                                                                                                                                                                                                                                                                                                                                                                                                                                                                                                                                                                                                                                                                                                                                                                                                                                                                                                                                                                                                                                                                                                                                                                                                                                                                                                                                                                                                                                                                                                                                                                                                  |
| Manuscript ID                   | bmjopen-2019-034431.R4                                                                                                                                                                                                                                                                                                                                                                                                                                                                                                                                                                                                                                                                                                                                                                                                                                                                                                                                                                                                                                                                                                                                                                                                                                                                                                                                                                                                                                                                                                                                                                                                                                                                                                                                           |
| Article Type:                   | Protocol                                                                                                                                                                                                                                                                                                                                                                                                                                                                                                                                                                                                                                                                                                                                                                                                                                                                                                                                                                                                                                                                                                                                                                                                                                                                                                                                                                                                                                                                                                                                                                                                                                                                                                                                                         |
| Date Submitted by the Author:   | 31-Mar-2020                                                                                                                                                                                                                                                                                                                                                                                                                                                                                                                                                                                                                                                                                                                                                                                                                                                                                                                                                                                                                                                                                                                                                                                                                                                                                                                                                                                                                                                                                                                                                                                                                                                                                                                                                      |
| Complete List of Authors:       | <p>Kang, Bing-xin; Guanghua Hospital of Integrated Traditional Chinese Medicine and Western Medicine, Shanghai University of Traditional Chinese Medicine, Orthopaedics</p> <p>Xu, Hui; Guanghua Hospital of Integrated Traditional Chinese Medicine and Western Medicine, Shanghai University of Traditional Chinese Medicine, Orthopaedics</p> <p>Gao, Chen-xin; Guanghua Hospital of Integrated Traditional Chinese Medicine and Western Medicine, Shanghai University of Traditional Chinese Medicine, Orthopaedics</p> <p>Zhong, Sheng; Guanghua Hospital of Integrated Traditional Chinese Medicine and Western Medicine, Shanghai University of Traditional Chinese Medicine, Orthopaedics</p> <p>Zhang, Jing; Guanghua Hospital of Integrated Traditional Chinese Medicine and Western Medicine, Shanghai University of Traditional Chinese Medicine, Orthopaedics</p> <p>Xie, Jun; Guanghua Hospital of Integrated Traditional Chinese Medicine and Western Medicine, Shanghai University of Traditional Chinese Medicine, Orthopaedics</p> <p>Sun, Song-tao ; Guanghua Hospital of Integrated Traditional Chinese Medicine and Western Medicine, Shanghai University of Traditional Chinese Medicine, Orthopaedics</p> <p>Ma, Ying-hui; Guanghua Hospital of Integrated Traditional Chinese Medicine and Western Medicine, Shanghai University of Traditional Chinese Medicine, Orthopaedics</p> <p>Zhai, Wei-tao; Guanghua Hospital of Integrated Traditional Chinese Medicine and Western Medicine, Shanghai University of Traditional Chinese Medicine, Orthopaedics</p> <p>Xiao, Lian-bo; Guanghua Hospital of Integrated Traditional Chinese Medicine and Western Medicine, Shanghai University of Traditional Chinese Medicine, Orthopaedics</p> |
| <b>Primary Subject Heading</b>: | Medical management                                                                                                                                                                                                                                                                                                                                                                                                                                                                                                                                                                                                                                                                                                                                                                                                                                                                                                                                                                                                                                                                                                                                                                                                                                                                                                                                                                                                                                                                                                                                                                                                                                                                                                                                               |
| Secondary Subject Heading:      | Surgery                                                                                                                                                                                                                                                                                                                                                                                                                                                                                                                                                                                                                                                                                                                                                                                                                                                                                                                                                                                                                                                                                                                                                                                                                                                                                                                                                                                                                                                                                                                                                                                                                                                                                                                                                          |
| Keywords:                       | tranexamic acid, total knee arthroplasty, perioperative blood management, Knee < ORTHOPAEDIC & TRAUMA SURGERY, Paediatric                                                                                                                                                                                                                                                                                                                                                                                                                                                                                                                                                                                                                                                                                                                                                                                                                                                                                                                                                                                                                                                                                                                                                                                                                                                                                                                                                                                                                                                                                                                                                                                                                                        |

1  
2  
3  
4  
5  
6  
7  
8  
9  
10  
11  
12  
13  
14  
15  
16  
17  
18  
19  
20  
21  
22  
23  
24  
25  
26  
27  
28  
29  
30  
31  
32  
33  
34  
35  
36  
37  
38  
39  
40  
41  
42  
43  
44  
45  
46  
47  
48  
49  
50  
51  
52  
53  
54  
55  
56  
57  
58  
59  
60

|  |                                             |
|--|---------------------------------------------|
|  | orthopaedics < ORTHOPAEDIC & TRAUMA SURGERY |
|  |                                             |

SCHOLARONE™  
Manuscripts



I, the Submitting Author has the right to grant and does grant on behalf of all authors of the Work (as defined in the below author licence), an exclusive licence and/or a non-exclusive licence for contributions from authors who are: i) UK Crown employees; ii) where BMJ has agreed a CC-BY licence shall apply, and/or iii) in accordance with the terms applicable for US Federal Government officers or employees acting as part of their official duties; on a worldwide, perpetual, irrevocable, royalty-free basis to BMJ Publishing Group Ltd ("BMJ") its licensees and where the relevant Journal is co-owned by BMJ to the co-owners of the Journal, to publish the Work in this journal and any other BMJ products and to exploit all rights, as set out in our [licence](#).

The Submitting Author accepts and understands that any supply made under these terms is made by BMJ to the Submitting Author unless you are acting as an employee on behalf of your employer or a postgraduate student of an affiliated institution which is paying any applicable article publishing charge ("APC") for Open Access articles. Where the Submitting Author wishes to make the Work available on an Open Access basis (and intends to pay the relevant APC), the terms of reuse of such Open Access shall be governed by a Creative Commons licence – details of these licences and which [Creative Commons](#) licence will apply to this Work are set out in our licence referred to above.

Other than as permitted in any relevant BMJ Author's Self Archiving Policies, I confirm this Work has not been accepted for publication elsewhere, is not being considered for publication elsewhere and does not duplicate material already published. I confirm all authors consent to publication of this Work and authorise the granting of this licence.

1  
2  
3  
4 1 **Multiple-dose tranexamic acid for perioperative blood loss in total knee**  
5  
6 2 **arthroplasty in patients with rheumatoid arthritis : A single-blinded,**  
7  
8 3 **randomized, parallel-controlled study protocol**

11 4 Bing-xin Kang\*, Hui Xu\*, Chen-xin Gao, Sheng Zhong, Jing Zhang, Jun Xie,  
12  
13  
14 5 Song-tao Sun, Ying-hui Ma, Wei-tao Zhai, Lian-bo Xiao

16  
17 6 **Author Affiliations:**

18  
19 7 Bing-xin Kang, MD, Department of Orthopaedics, Guanghua Hospital of Integrated  
20  
21  
22 8 Traditional Chinese Medicine and Western Medicine, Shanghai University of  
23  
24 9 Traditional Chinese Medicine, Shanghai, China, 15738314790@163.com  
25  
26  
27 10 Hui Xu, MD, Department of Orthopaedics, Guanghua Hospital of Integrated  
28  
29  
30 11 Traditional Chinese Medicine and Western Medicine, Shanghai University of  
31  
32 12 Traditional Chinese Medicine, Shanghai, China, 1511911882@qq.com  
33  
34  
35 13 Chen-xin Gao, MD, Department of Orthopaedics, Guanghua Hospital of Integrated  
36  
37  
38 14 Traditional Chinese Medicine and Western Medicine, Shanghai University of  
39  
40 15 Traditional Chinese Medicine, Shanghai, China, 706046133@qq.com  
41  
42  
43 16 Sheng Zhong, MD, Department of Orthopaedics, Guanghua Hospital of Integrated  
44  
45  
46 17 Traditional Chinese Medicine and Western Medicine, Shanghai University of  
47  
48 18 Traditional Chinese Medicine, Shanghai, China, drcyan@foxmail.com  
49  
50  
51 19 Jing Zhang, MD, Department of Orthopaedics, Guanghua Hospital of Integrated  
52  
53  
54 20 Traditional Chinese Medicine and Western Medicine, Shanghai University of  
55  
56 21 Traditional Chinese Medicine, Shanghai, China, franksamo@126.com  
57  
58  
59 22 Jun Xie, MD, Department of Orthopaedics, Guanghua Hospital of Integrated  
60

1  
2  
3  
4 23 Traditional Chinese Medicine and Western Medicine, Shanghai University of  
5  
6  
7 24 Traditional Chinese Medicine, Shanghai, China, leoxie199@126.com  
8  
9 25 Song-tao Sun, MD, Department of Orthopaedics, Guanghua Hospital of Integrated  
10  
11  
12 26 Traditional Chinese Medicine and Western Medicine, Shanghai University of  
13  
14  
15 27 Traditional Chinese Medicine, Shanghai, China, sstever0156258@aliyun.com  
16  
17 28 Ying-hui Ma, MD, Department of Orthopaedics, Guanghua Hospital of Integrated  
18  
19  
20 29 Traditional Chinese Medicine and Western Medicine, Shanghai University of  
21  
22  
23 30 Traditional Chinese Medicine, Shanghai, China, mayinghui021@126.com  
24  
25 31 Wei-tao Zhai, MD, Department of Orthopaedics, Guanghua Hospital of Integrated  
26  
27  
28 32 Traditional Chinese Medicine and Western Medicine, Shanghai University of  
29  
30  
31 33 Traditional Chinese Medicine, Shanghai, China, 13901808309@163.com  
32  
33 34 Lian-bo Xiao, MD, Department of Orthopaedics, Guanghua Hospital of Integrated  
34  
35  
36 35 Traditional Chinese Medicine and Western Medicine, Shanghai University of  
37  
38  
39 36 Traditional Chinese Medicine, Shanghai, China, 13701888178@163.com  
40  
41 37 Bing-xin Kang and Hui Xu contributed equally to this paper.

### 42 **Corresponding Author**

43  
44  
45 39 Lian-bo Xiao, PhD, Guanghua Hospital of Integrated Traditional Chinese Medicine  
46  
47  
48 40 and Western Medicine, Shanghai University of Traditional Chinese Medicine. NO.  
49  
50  
51 41 540 Xinhua Road, Changning District, Shanghai (CN 200052), China,  
52  
53 42 13701888178@163.com; +8613701888178  
54  
55

56 43

57 44

### 58 45 **ABSTRACT**

1  
2  
3  
4 46 **Introduction** This clinical trial is designed to evaluate the effect of multiple-dose  
5  
6 47 tranexamic acid (TXA) on perioperative blood loss in patients with rheumatoid  
7  
8  
9 48 arthritis (RA).

10  
11 49 **Methods and analysis** A randomized, single-blinded, parallel-controlled study will  
12  
13  
14 50 be designed. RA patients (age 50-75 years) undergoing unilateral primary end-stage  
15  
16  
17 51 total knee arthroplasty will be randomly divided into Group A or Group B. Group A  
18  
19  
20 52 will be treated with one dose of TXA (1 g; intravenous injection 3 hours post-surgery)  
21  
22  
23 53 and Group B with three doses (1 g; intravenous injection at 3, 6, and 12 hours  
24  
25 54 post-surgery) after surgery. The primary outcomes will be evaluated with blood loss,  
26  
27 55 maximum haemoglobin drop, and transfusion rate. The secondary outcomes will be  
28  
29  
30 56 evaluated with knee function and complications.

31  
32 57 **Ethics and dissemination** This study has been approved by the ethics committee, and  
33  
34  
35 58 subsequent modifications of the protocol will be reported and approved by it. All of  
36  
37  
38 59 the participants or their authorised agents will give written informed consent before  
39  
40  
41 60 the study.

42  
43 61 **Trial registration number** ChiCTR1900025013; Pre-results.

## 44 45 62 **Article Summary**

46  
47  
48 63 Strengths and limitations of this trial

49  
50  
51 64 (1) This is the first study in China to evaluate the efficacy and safety of a  
52  
53  
54 65 perioperative multiple-dose regimen of tranexamic acid during total knee arthroplasty  
55  
56 66 in rheumatoid arthritis patients.



1  
2  
3  
4 67 (2) The bias of this study was reduced dramatically by the extensive study design,  
5  
6 68 which included proper randomization, allocation concealment, and objective  
7  
8  
9 69 indications.  
10  
11  
12 70 (3) The short follow-up time, may be insufficient in fully assessing the risk of  
13  
14 71 complications in a multiple-dose regimen of tranexamic acid during total knee  
15  
16  
17 72 arthroplasty in rheumatoid arthritis patients.  
18  
19  
20  
21  
22  
23  
24  
25

## 75 INTRODUCTION

26  
27 76 Rheumatoid arthritis (RA) may be accompanied by haematological diseases such as  
28  
29  
30 77 anaemia.<sup>[1]</sup> The overall prevalence of RA is 0.5-1% in Europe and North America,  
31  
32  
33 78 0.31% in France, 0.32-0.38% in China, and 0.02-0.047% in Japan.<sup>[2,3]</sup> Total knee  
34  
35 79 arthroplasty (TKA) is effective in treating flexion contractures and maintaining the  
36  
37  
38 80 stability of knees effected by RA.<sup>[4]</sup> About 0.005% of RA patients receive TKA, a rate  
39  
40  
41 81 that has gradually decreased over the past decades. However, surgery remains the first  
42  
43  
44 82 choice for articular deformity and pain, despite the fact that disease-modifying  
45  
46  
47 83 antirheumatic drugs and biologics agents can manage synovitis-related symptoms in  
48  
49  
50 84 RA patients.<sup>[5]</sup> Haemorrhage is a major perioperative complication of TKA.<sup>[6]</sup>  
51  
52  
53 85 Excessive blood loss should be treated with an allogeneic blood transfusion, but this  
54  
55  
56 86 has adverse effects such as immune complications, prolong hospitalization time, and  
57  
58  
59 87 increased infection rate.<sup>[7,8]</sup> Haemoglobin has a negative correlation with disease  
60  
88 88 activity in RA.<sup>[9]</sup> Therefore, we believe that perioperative blood loss management is

1  
2  
3  
4 89 needed for patients with RA.  
5

6 90 Accounting for approximately 50% of the total blood loss, hidden blood loss (HBL)  
7  
8  
9 91 is the blood lost as infiltrates into the tissue intraoperatively and postoperatively. This  
10  
11  
12 92 blood resides in the knee joint cavity before being haemolyzed.<sup>[10]</sup> HBL often leads to  
13  
14  
15 93 the joint swelling, postoperative inflammation, and pain.<sup>[11,12]</sup>  
16

17 94 Use of a surgical tourniquet can reduce intraoperative bleeding,<sup>[13]</sup> provide a clear  
18  
19  
20 95 view during the surgery, and facilitate the connection between the cement, bone and  
21  
22  
23 96 joint prostheses.<sup>[14]</sup> However, after the release of the tourniquet, local tissue may be  
24  
25  
26 97 damaged by ischemic reperfusion injury, and the fibrinolytic system may be  
27  
28  
29 98 activated.<sup>[15,16]</sup> As a consequence, peripheral blood circulation can be accelerated,  
30  
31  
32 99 plasma fibrinolysis enhanced, and postoperative HBL increased.<sup>[15]</sup> Therefore,  
33  
34  
35 100 reducing the dissolution of fibrin can reduce postoperative HBL.<sup>[17]</sup>  
36

37 101 Tranexamic acid (TXA) is a synthetic lysine derivative that competitively inhibits  
38  
39  
40 102 the binding between plasminogen and fibrin, prevents the activation of plasminogen,  
41  
42  
43 103 and protects fibrin from degradation and dissolution by plasmin. TXA was initially  
44  
45  
46 104 used in obstetric and gynaecologic surgery, and its use was then gradually replicated  
47  
48  
49 105 in other surgeries to reduce bleeding and blood transfusion rates.<sup>[18,19]</sup> The CRASH-2  
50  
51  
52 106 trial has demonstrated the effectiveness and safety of TXA in reducing blood loss.<sup>[20]</sup>  
53  
54  
55 107 A large amount of literature has reported that TXA can significantly reduce peri-TKA  
56  
57  
58 108 blood loss.<sup>[21-25]</sup> Currently, TXA is recommended for perioperative management of  
59  
60  
61 109 blood loss during TKA.<sup>[26]</sup> However, its efficacy and safety in RA patients undergoing  
62  
63  
64 110 TKA has rarely been reported.<sup>[27]</sup> TXA can be administered through oral intake, a  
65

1  
2  
3  
4 111 single large-dose intravenous injection, an intra-articular injection, joint cavity  
5  
6 112 irrigation, postoperative drainage tube injection, or through a combination of these  
7  
8  
9 113 methods.<sup>[25,28-30]</sup> There is no consensus on the optimal dosage and timing of  
10  
11 114 perioperative TXA administration for TKA.<sup>[18,31,32]</sup> Studies have shown that  
12  
13 115 fibrinolysis peaks at 6 hours and continues for approximately 18 hours after TKAs  
14  
15 116 that were performed with tourniquets.<sup>[33]</sup> The half-life of TXA in the plasma is 2  
16  
17 117 hours, and its concentration peaks at 1 hour after injection.<sup>[34]</sup> Thus, we suspect that a  
18  
19 118 single dose of TXA may not be sufficient to exert an anti-fibrinolytic effect. There are  
20  
21 119 also studies suggesting that, for patients with osteoarthritis, higher doses (within the  
22  
23 120 normal range) during the perioperative period can increase the efficacy of TXA.<sup>[35,36]</sup>  
24  
25 121 The purpose of this clinical trial is to verify the effectiveness and safety of multiple  
26  
27 122 doses of TXA in reducing perioperative blood loss in RA patients treated with TKA,  
28  
29 123 in order to determine a new strategy for management of perioperative blood loss  
30  
31 124 during TKA.  
32  
33  
34  
35  
36  
37  
38  
39

40 125

41 126

## 42 127 **METHODS AND ANALYSIS**

### 43 128 **Study context**

44 129 This clinical trial was initiated on 1 September 2019 in the wards of Shanghai  
45  
46 130 University of Traditional Chinese Medicine Guanghua Hospital (Shanghai, China).  
47  
48 131 The annual number of TKA cases performed in RA patients was about 300 in 2018.  
49  
50 132 Eleven investigators will be involved in this study including 2 senior orthopaedic  
51  
52 133 surgeons (L-bX, W-tZ) with 20 years of clinical experience, 6 orthopaedic physicians

1  
2  
3  
4 134 (C-xG, JZ, JX, S-sT, Y-hM, and SZ), 2 data collectors who are also statisticians  
5  
6  
7 135 (B-xK and HX), and a nurse (X-rX). Informed consent will be obtained from all  
8  
9  
10 136 patients. The perioperative ERAS blood management programme and the trial flow  
11  
12 137 chart are shown in Table 1 and Figure 1. The schedule is shown in Table 2.

**Table 1** Enhanced recovery after surgery blood management

Preoperative

1 Treatment of haemorrhagic primary disease

2 Nutritional guidance, balanced diet

3 Iron application

4 Rhu-Epo application

Intraoperative

5 Minimally invasive surgery

6 Tourniquet optimization

7 Controlled buck

8 Autologous blood return

9 Use of tranexamic acid

Postoperative

10 Reduce bleeding (pressure dressing of wounds, prevent stress ulcers)

11 Nutritional support, iron supplementation, use of Rhu-Epo

Rhu-Epo, recombinant human erythropoietin.

138

**Table 2** The schedule of trial enrolment, interventions, and assessments

|                           | Outcome assessment |    |    |    |     |
|---------------------------|--------------------|----|----|----|-----|
|                           | Pre-OP             | D1 | D3 | D7 | D14 |
| Enrolment                 | ●                  |    |    |    |     |
| Assessment of eligibility | ●                  |    |    |    |     |
| Randomisation             | ●                  |    |    |    |     |

|                                                |   |   |   |   |   |
|------------------------------------------------|---|---|---|---|---|
| Group A                                        | • | • | • | • | • |
| Post-OP 1 dose of TXA                          | • | • | • | • | • |
| Group B                                        | • | • | • | • | • |
| Post-OP 3 doses of TXA                         | • | • | • | • | • |
| HBL                                            | • | • | • | • | • |
| Haemoglobin level                              | • | • | • | • | • |
| Inflammatory index                             | • | • | • | • | • |
| Inflammatory factor                            | • | • | • | • | • |
| Coagulation index                              | • | • | • | • | • |
| Swelling rate                                  | • | • | • | • | • |
| DVT                                            | • | • | • | • | • |
| PE                                             | • | • | • | • | • |
| Postoperative complications and adverse events | • | • | • | • | • |

OP, operative; TXA, tranexamic acid; HBL, hidden blood loss; DVT, deep vein thrombosis; PE, pulmonary embolism; D1, the 1<sup>st</sup> day after surgery; D3, the 3<sup>rd</sup> day after surgery; D7, the 7<sup>th</sup> day after surgery; D14, the 14<sup>th</sup> day after surgery.

139

#### 140 Sample size calculation

141 This study uses a completely randomized trial design. Multiple sample sizes will  
 142 evaluated by a review of previously conducted clinical research.<sup>[25]</sup> The primary  
 143 outcome will be measured with the amount of HBL, dependent on TXA therapy. The  
 144 overall standard deviation is  $\sigma = 250$ , and the allowable error estimate is  $\delta = 200$ .

145 These values were estimated using the statistical formula 
$$n_1 = n_2 = 2 \times \left[ \frac{(Z_{\alpha/2} + Z_{\beta})^2 \sigma^2}{\delta^2} \right]$$
.

146 Predicting an estimated dropout rate of 10%, 104 subjects will be required to yield a

1  
2  
3  
4 147 power of 90% with a significance level of 0.05.  
5  
6 148

7  
8 149 **Randomization and allocation concealment**  
9

10  
11 150 Patients will be randomly assigned to two groups (1:1 ratio). This will be done by  
12  
13 151 assigning each patient a number from 1 to 104. SPSS version 25.0 (IBM Corporation,  
14  
15  
16 152 Armonk, NY) will be used to generate a random sequence containing the numbers 1  
17  
18 153 to 104, dividing these numbers in two groups. These group lists will be placed in an  
19  
20  
21 154 opaque envelope and put into a computer by encryption. The group data will be saved  
22  
23  
24 155 by the statistician. Only the nurse will be allowed to check the enrolment and give the  
25  
26  
27 156 corresponding treatment.  
28  
29

30 157  
31  
32  
33

34 158 **Single-blinded design**  
35  
36  
37

38 159 Only the nurse will be allowed to know the patients' enrolment and give them the  
39  
40  
41 160 corresponding treatment. The outcome evaluators will objectively record the patients'  
42  
43 161 test results.  
44  
45

46 162  
47

48 163 **Eligibility criteria**  
49

50  
51 164 The eligibility criteria have been set in accordance with the 'American Rheumatism  
52  
53 165 Association criteria for rheumatoid arthritis'<sup>[37]</sup> and the 2010 'ACR/EULAR  
54  
55  
56 166 classification criteria for rheumatoid arthritis'.<sup>[38]</sup> The eligibility criteria are as follows:  
57  
58  
59 167 (1) The patient must have been diagnosed with RA in Stage III or IV according to the  
60

1  
2  
3  
4 168 Kellgren-Lawrence classification;<sup>[39]</sup> (2) The patient must be 50 to 75 years old; (3)  
5  
6  
7 169 The patient must be willing to undergo the unilateral primary TKA; (4) The patient  
8  
9 170 must receive perioperative anti-fibrinolytic TXA therapy; and (5) The patient must  
10  
11  
12 171 show normal blood-clotting function and must not have preoperative anaemia.  
13  
14  
15

### 16 173 **Exclusion criteria**

17  
18  
19 174 The exclusion criteria are as follows: (1) Other types of arthritis (such as primary  
20  
21  
22 175 arthritis, post-traumatic osteoarthritis, gouty osteoarthritis, haemophilic osteoarthritis,  
23  
24 176 and tuberculous arthritis); (2) Bilateral knee arthroplasty (RA patients); (3) Severe  
25  
26  
27 177 cardiovascular disease (such as myocardial infarction, atrial fibrillation, angina  
28  
29  
30 178 pectoris, and cardiac failure) or cerebrovascular disease (such as cerebral infarction  
31  
32  
33 179 and cerebral haemorrhage); and (4) Prolonged use of oral anticoagulant drugs (such as  
34  
35 180 aspirin, warfarin, and clopidogrel).  
36  
37  
38

### 39 182 **Elimination criteria**

40  
41  
42 183 The elimination criteria are as follows: (1) Acquired colour vision disorder; (2) Active  
43  
44 184 intravascular coagulation patients; and (3) A history of seizures.  
45  
46  
47  
48

### 49 186 **Termination criteria**

50  
51  
52 187 The termination criteria are as follows: (1) Shock; (2) Allergic symptoms such as  
53  
54 188 itching and a rash; (3) Digestive disorders such as nausea, vomiting, loss of appetite,  
55  
56  
57 189 and diarrhoea after medication; (4) Symptoms such as reactive dermatitis, dizziness,  
58  
59  
60 190 hypotension, drowsiness, headache; convulsions, and visual impairment; and (5)

1  
2  
3  
4 191 Adverse events such as intracranial thrombosis and intracranial haemorrhage after  
5  
6 192 medication.

7  
8  
9 193

#### 10 11 194 **Perioperative anti-rheumatic treatment**

12  
13  
14 195 Methotrexate and hydroxychloroquine will be used during the perioperative period.

15  
16 196 Leflunomide will be discontinued one week before surgery. Use of other  
17  
18 197 disease-modifying antirheumatic drugs will be discontinued two days before surgery,  
19  
20 198 and restarted 1-2 days after gastrointestinal function recovery. The use of newer  
21  
22 199 biologic agents such as tumour necrosis factor alpha will be discontinued 4 to 5  
23  
24 200 half-lives before surgery and restarted after wound healing and infection  
25  
26 201 elimination.<sup>[40,41]</sup>

27  
28  
29 202

#### 30 31 32 33 203 **Surgery and anesthesia**

34  
35  
36 204 Surgery will be performed by two senior surgeons (L-bX and W-tZ). During each  
37  
38 205 surgery, a standard midline incision will be followed by a medial parapatellar capsular  
39  
40 206 incision to expose the knee joint. A tourniquet will be used for all patients at a  
41  
42 207 pressure of 200-250 mmHg. The operations will be conducted under general  
43  
44 208 anaesthesia and blood pressure will be controlled within a range of 80 to 100 mmHg /  
45  
46 209 60 to 70 mmHg by anaesthetists throughout the surgical procedure. During the  
47  
48 210 operation, conventional anti-infective, combined analgesic, anti-inflammatory,  
49  
50 211 anti-coagulation treatment, and other symptomatic treatments will be administered  
51  
52 212 according to the 'Chinese Hip and Total Knee Arthroplasty Surgery Perioperative  
53  
54 213 Anti-fibrinolytic Drug Sequential Anticoagulant Application Programme Expert



1  
2  
3  
4 214 Consensus'.<sup>[26]</sup> Ten minutes prior to skin incision, 1 g of TXA + 100 mL of  
5  
6 215 intravenous-saline will be administered, and then 1.5 g of TXA + 50 mL  
7  
8 216 articular-injection saline will be administered post-operatively into the sutured joint  
9  
10 217 cavity. Group A and B will then receive additional TXA therapy according to the  
11  
12 218 treatment regime devised for each group.  
13  
14  
15

16  
17 219 TXA is produced by Hunan Dongting Pharmaceutical Co., Ltd., and used according  
18  
19 220 to the second edition of the 2015 Chinese Pharmacopoeia and Drug Supplement  
20  
21 221 Application Approval (2013B02016), YBH07372010; the National Drug Standard  
22  
23 222 approval number is H43020565.  
24  
25  
26

27 223

#### 28 29 224 **Study interventions**

30  
31 225 Group A: 1 g of TXA + 100 mL of physiological saline will be administered  
32  
33 226 intravenously 3 hours after the operation. Group B: 1 g of TXA + 100 mL of  
34  
35 227 physiological saline will be administered intravenously 3, 6, and 12 hours after the  
36  
37 228 operation.  
38  
39  
40

41 229

#### 42 43 230 **Pain management and rehabilitation**

44  
45  
46 231 A cocktail injection will be given during the operation, and 0.2 g of oral celecoxib  
47  
48 232 will be given after surgery for analgesia. After the anaesthesia, the maximum angles  
49  
50 233 of flexion and extension of the ankle will be maintained for 6 seconds, and the foot  
51  
52 234 will then be allowed to relax for 5 seconds. This exercise will be performed on both  
53  
54 235 limbs in order to ensure the quadriceps contractions are equal. On the first  
55  
56 236 postoperative day, the patients will be encouraged to exercise using straight-leg-raises,  
57  
58  
59  
60

1  
2  
3  
4 237 supine-knee-flexion, and knee flexion and extension in sitting. Machine-assisted  
5  
6 238 exercises, such as continuous passive motion, will begin on the third day after  
7  
8  
9 239 surgery.

10 240

### 11 241 **Antibiotics**

12  
13  
14  
15  
16 242 For perioperative infection prophylaxis, cefazolin (40 mg) will be administered 30  
17  
18 243 minutes before surgery and 24-48 hours after surgery.<sup>[42]</sup>

19 244

### 20 245 **Prevention of lower extremity venous thrombosis**

21  
22  
23  
24  
25  
26 246 Six hours after the surgery, enoxaparin sodium injections (60 mg) will be initiated and  
27  
28 247 continued daily for 14 days to prevent formation of a deep vein thrombosis.<sup>[26]</sup>

29 248

### 30 249 **Outcomes**

31  
32  
33  
34  
35  
36 250 Complete blood count, hepatic function, renal function, and coagulation function will  
37  
38 251 be tested before surgery routinely. Complete blood count, inflammatory index,  
39  
40  
41 252 inflammatory factor and coagulation index will be tested at the 1st, 3<sup>rd</sup>, 7<sup>th</sup> and 14<sup>th</sup>  
42  
43  
44 253 days after surgery. All the blood test will be assessed in our hospital (Department of  
45  
46 254 Clinical Laboratory of Guanghai Hospital of Integrated Traditional Chinese Medicine  
47  
48  
49 255 and Western Medicine) by an inspector who is not involved in this clinical trial.

50 256

### 51 257 **Primary outcomes**

52  
53  
54  
55  
56 258 *The blood lose, haemoglobin level, and transfusion rate*

57  
58  
59  
60

1  
2  
3  
4 259 The blood loss is calculated according to the formulae by Nadle<sup>[43]</sup> and Gross:<sup>[44]</sup>  
5  
6 260 Patient's blood volume (PBV) =  $K1 \times \text{height}^3 (\text{m}^3) + K2 \times \text{weight} (\text{kg}) + K3$ . Male:  
7  
8  
9 261  $K1 = 0.3669$ ,  $K2 = 0.03219$ ,  $K3 = 0.6041$ ; Female:  $K1 = 0.3561$ ,  $K2 = 0.03308$ ,  $K3 =$   
10  
11 262  $0.1833$ . Total blood loss (TBL) =  $\text{PBV} \times (\text{Hct}_{\text{pre}} - \text{Hct}_{\text{post}}) / \text{Hct}_{\text{ave}}$ .  $\text{Hct}_{\text{pre}}$  = the initial  
12  
13 263 pre-operative Hct level;  $\text{Hct}_{\text{post}}$  = the lowest Hct post-operative;  $\text{Hct}_{\text{ave}}$  = the average  
14  
15 264 of the  $\text{Hct}_{\text{pre}}$  and  $\text{Hct}_{\text{post}}$ . The amount of intraoperative blood loss = the total volume of  
16  
17 265 fluid in the negative pressure drain - the volume of normal saline. HBL volume =  
18  
19 266 TBL volume - intra-operative blood loss volume.

20  
21  
22  
23  
24 267 The maximum haemoglobin decline will be defined as the difference between the  
25  
26 268 pre-operative Hb level and the minimal Hb level drawn post-operatively during the  
27  
28 269 hospitalization and prior to any blood transfusion. The transfusion rate for patients  
29  
30 270 requiring a transfusion will be determined post-operatively during the inpatient  
31  
32 271 hospital stay.  
33  
34  
35  
36  
37  
38  
39

40 273 Secondary outcomes

41  
42 274 *Knee function and swelling*

43  
44 275 Knee function will be measured using the American Knee Society Score (AKSS) one  
45  
46 276 day before surgery and on the 3<sup>rd</sup>, 7<sup>th</sup> and 14<sup>th</sup> days after surgery. A trained researcher  
47  
48 277 will educate all patients until they fully understand how to assess their knee function  
49  
50 278 using the questionnaires. The degree of swelling is defined as the postoperative  
51  
52 279 circumference of the upper tibia divided by the preoperative circumference of the  
53  
54 280 upper tibia.  
55  
56  
57  
58  
59  
60

1  
2  
3  
4 2815  
6 282 *Adverse events*

7  
8  
9 283 Potential adverse events include deep vein thrombosis (clinical manifestations: acute  
10  
11 284 onset, affected limb swelling, sever pain, or significant tenderness at the femoral  
12  
13 285 triangle or/and leg) and pulmonary embolism (clinical manifestations: cough, chest  
14  
15 286 tightness, palpitations, haemoptysis, shortness of breath, dizziness, shock, cyanosis,  
16  
17 287 increased respiratory rate, arteriovenous filling, or pulsation, etc.). Deep vein  
18  
19 288 thrombosis and pulmonary embolism will be diagnosed by Doppler ultrasound and  
20  
21 289 computer tomography, respectively. The wound healing process and complications  
22  
23 290 (wound bleeding, haematoma, wound infection, and deep infection) will be observed  
24  
25 291 and recorded in the patient's case report forms (CRFs) during hospitalization and  
26  
27 292 follow-ups.  
28  
29  
30  
31  
32  
33  
34

35 293

36  
37 294 *Adverse event treatment*

38  
39 295 Adverse events during the follow-up period will be recorded in the CRFs, and their  
40  
41 296 relevance to drug use will be evaluated. All the adverse events will be classified in  
42  
43 297 accordance with the five-level scoring systems (5.0) of the CTCAE. Serious adverse  
44  
45 298 events are defined as those that may cause cancer, teratogenicity, death, permanent  
46  
47 299 damage to organ function, permanent or significant disability, and prolonged hospital  
48  
49 300 stay. In the case of adverse events occurring, the researcher should immediately take  
50  
51 301 appropriate measures and report these events to the hospital and ethics committees  
52  
53 302 within 24 hours.  
54  
55  
56  
57  
58  
59

60 303

60 304 **Data management**

1  
2  
3 305 Data on the CRFs will be put into the computer by two independent trained research  
4  
5 306 assistants with a double-entry method. The hospital's independent investigators will  
6  
7 307 check the data periodically.  
8  
9

10 308

### 11 309 **Statistical analysis**

12  
13  
14 310 (1) Descriptive analysis on the characteristics of the study participants; (2) Balance  
15  
16 311 analysis on the baseline values in groups; (3) Comparison of the balance of primary  
17  
18 312 outcomes between groups; and (4) Comparison of secondary outcomes and safety  
19  
20 313 between groups. The total rate of adverse events in the two groups will be tested by  
21  
22 314 the bidirectional disordered R\*C list chi-square test. The association between the  
23  
24 315 incidence of adverse events and the dose of TXA use will be described.  
25  
26  
27  
28  
29

30 316

### 31 317 **Ethics and dissemination**

32  
33  
34 318 Written inform consent will be obtained from all participants or their authorised  
35  
36 319 agents before the study. All TXA treatments will be free. Research data will be kept  
37  
38 320 strictly confidential and obtained from appropriate authors upon reasonable request.  
39  
40 321 Results of the trial will be published on the website of the China Clinical Trials  
41  
42 322 Registry and in peer-reviewed journals.  
43  
44  
45  
46  
47

48 323

### 49 324 **The Patient and public involvement**

50  
51  
52 325 Patients and public will not be involved in the development of the research question  
53  
54 326 or in the design of the study. Patients will receive oral and written information about  
55  
56 327 this trial, pertaining to the benefits, risks and discomforts that they may get from the  
57  
58 328 study. Besides, the burden of the intervention will be assessed by patients themselves.  
59  
60

1  
2  
3  
4 329 Dissemination of the general results (no personal data) will be made on demand.  
5  
6  
7 330  
8  
9  
10 331  
11  
12  
13

14 332 **DISCUSSION**  
15  
16

17  
18 333 Controlling blood loss can facilitate the recovery from TKA surgery. Previous clinical  
19  
20 334 studies have shown that high doses of TXA can reduce blood loss after TKA in  
21  
22  
23 335 patients with osteoarthritis.<sup>[25,45,46]</sup> It has been reported that an intravenous infusion of  
24  
25  
26 336 TXA, combined with intra-articular injection may be the optimal bleeding-control  
27  
28 337 scheme.<sup>[47,48]</sup> Previous studies have shown that knee joint swelling after TKA is  
29  
30  
31 338 associated with HBL in the joint cavity. TXA can reduce postoperative HBL, thereby  
32  
33  
34 339 relieving the swelling around the joint.<sup>[11]</sup> Given that plasminogen activators play an  
35  
36 340 important role in RA-involved inflammation, the dissolution of fibrin will trigger an  
37  
38  
39 341 inflammatory response.<sup>[49]</sup> Therefore, we suspect that multiple doses of TXA in the  
40  
41 342 perioperative period may exert an auxiliary anti-inflammatory effect.  
42  
43

44 343 Enhanced recovery after surgery is strongly advocated, and the management of  
45  
46 344 perioperative blood loss is an essential component. The RA patients aged 50-80 years  
47  
48  
49 345 undergoing TKA have a lower risk of requiring a revision, and are likely to obtain  
50  
51  
52 346 higher knee function and present with fewer complications.<sup>[50,51]</sup> In order to reduce  
53  
54 347 bias caused by a wide age range, patients aged 50-75 will be selected. This study will  
55  
56  
57 348 provide new evidence for managing perioperative blood loss in TKA in Chinese RA  
58  
59 349 patients if the results indicate that the administration of the additional three doses of  
60

1  
2  
3  
4 350 TXA therapy after surgery is beneficial over a single dose.  
5  
6  
7 351  
8  
9 352

10 353 **Author Contributions** B-xK, HX and L-bX conceived the study while B-xK and HX  
11  
12  
13 354 drafted the study protocol, B-xK and HX contributed equally to this work and should  
14  
15  
16 355 be regarded as co-first authors. The study protocol was designed by C-xG, SZ, JZ, JX,  
17  
18 356 S-tS, Y-hM, and W-tZ. All authors approved the final manuscript of this study  
19  
20  
21 357 protocol.

22  
23 358 **Funding** This work will be supported by the Foundation of Health and Family  
24  
25  
26 359 planning Commission of Shanghai (Grant NO. ZY (2018-2020)-FWTX-6023).

27  
28 360 **Conflicts of Interests** The authors declared that there are no potential conflicts of  
29  
30  
31 361 interest with respect to the research, authorship, and/or publication of this study.

32  
33  
34 362 **Patient consent for publication** Written informed consent will be obtained.

35  
36 363 **Ethics approval** This study has been approved by the ethics committee Shanghai  
37  
38  
39 364 Guanghua Hospital of Integrated Traditional Chinese Medicine and Western  
40  
41  
42 365 Medicine (approval NO. 2019-K-13), and any modification of the protocol will be  
43  
44  
45 366 reported and approved by it.

46  
47 367 **Provenance and peer review** Not commissioned; externally peer reviewed.

48  
49  
50 368

51  
52 369

53  
54 370 **REFERENCES**

- 55  
56  
57 371 1 Goyal L, Shah PJ, Yadav RN, *et al.* Anaemia in newly diagnosed patients of rheumatoid  
58  
59 372 arthritis and its correlation with disease activity. *J Assoc Physicians India* 2018;66:26-9.  
60

- 1  
2  
3  
4 373 2 Minichiello E, Semerano L, Boissier MC. Time trends in the incidence, prevalence, and  
5 374 severity of rheumatoid arthritis: A systematic literature review. *Jt Bone Spine*  
6 375 2016;83:625-30. doi:10.1016/j.jbspin.2016.07.007  
7  
8  
9 376 3 Shichikawa K, Inoue K, Hirota S, *et al.* Changes in the incidence and prevalence of  
10 377 rheumatoid arthritis in Kamitonda, Wakayama, Japan, 1965-1996. *Ann Rheum Dis*  
11 378 1999;58:751-6. doi:10.1136/ard.58.12.751  
12  
13  
14 379 4 Yan D, Yang J, Pei F. Total knee arthroplasty treatment of rheumatoid arthritis with severe  
15 380 versus moderate flexion contracture. *J Orthop Surg Res* 2013;8:41.  
16 381 doi:10.1186/1749-799X-8-41  
17  
18  
19 382 5 Louie GH, Ward MM. Changes in the rates of joint surgery among patients with rheumatoid  
20 383 arthritis in California, 1983-2007. *Ann. Rheum. Dis.* 2010;69:868-71.  
21 384 doi:10.1136/ard.2009.112474  
22  
23  
24 385 6 Ker K, Roberts I. Tranexamic acid for surgical bleeding. *BMJ* 2014;349(aug12  
25 386 11):g4934-g4934. doi:10.1136/bmj.g4934  
26  
27  
28 387 7 Freedman J, Luke K, Escobar M, *et al.* Experience of a network of transfusion coordinators for  
29 388 blood conservation (Ontario Transfusion Coordinators [ONTraC]). *Transfusion*  
30 389 2008;48(2):237-250. doi:10.1111/j.1537-2995.2007.01515.x  
31  
32  
33 390 8 McCormack PL. Tranexamic Acid: A review of its use in the treatment of hyperfibrinolysis.  
34 391 *Drugs* 2012;72:585-617. doi:10.2165/11209070-000000000-00000  
35  
36  
37 392 9 Padjen I, Öhler L, Studenic P, *et al.* Clinical meaning and implications of serum hemoglobin  
38 393 levels in patients with rheumatoid arthritis. *Semin Arthritis Rheum* 2017;47:193-8.  
39 394 doi:10.1016/j.semarthrit.2017.03.001  
40  
41  
42 395 10 Sehat KR, Evans R, Newman JH. How much blood is really lost in total knee arthroplasty?  
43 396 Correct blood loss management should take hidden loss into account. *Knee* 2000;7:151-5.  
44 397 doi:10.1016/S0968-0160(00)00047-8  
45  
46  
47 398 11 Ishida K, Tsumura N, Kitagawa A, *et al.* Intra-articular injection of tranexamic acid reduces  
48 399 not only blood loss but also knee joint swelling after total knee arthroplasty. *Int Orthop*  
49 400 2011;35:1639-45. doi:10.1007/s00264-010-1205-3  
50  
51  
52 401 12 Liu X, Zhang X, Chen Y, *et al.* Hidden blood loss after total hip arthroplasty. *The Journal of*  
53 402 *arthroplasty* 2011;26:1100-11050. doi:10.1016/j.arth.2010.11.013



- 1  
2  
3  
4 403 13 Tarwala R, Dorr LD, Gilbert PK, *et al.* Tourniquet use during cementation only during total  
5  
6 404 knee arthroplasty: A randomized trial knee. *Clin Orthop Relat Res* 2014;472:169-74.  
7  
8 405 doi:10.1007/s11999-013-3124-2  
9  
10 406 14 Arthur JR, Spangehl MJ. Tourniquet Use in Total Knee Arthroplasty. *Journal of Knee*  
11  
12 407 *Surgery* 2019;32:719-29. doi:10.1055/s-0039-1681035  
13  
14 408 15 Schnettler T, Papillon N, Rees H. Use of a Tourniquet in Total Knee Arthroplasty Causes a  
15  
16 409 Paradoxical Increase in Total Blood Loss. *Journal of Bone & Joint Surgery* 2017;99:1331-6.  
17  
18 410 doi:10.2106/JBJS.16.00750  
19  
20 411 16 Aglietti P, Baldini A, Vena LM, *et al.* Effect of tourniquet use on activation of coagulation in  
21  
22 412 total knee replacement. *Clin Orthop Relat Res* 2000;85:169-77.  
23  
24 413 doi:10.1097/00003086-200002000-00021  
25  
26 414 17 Benoni G, Lethagen S, Fredin H. The effect of tranexamic acid on local and plasma  
27  
28 415 fibrinolysis during total knee arthroplasty. *Thromb Res* 1997;85:195-206.  
29  
30 416 doi:10.1016/S0049-3848(97)00004-2  
31  
32 417 18 Jennings JD, Solarz MK, Haydel C. Application of Tranexamic Acid in Trauma and  
33  
34 418 Orthopedic Surgery. *Orthop Clin North Am* 2016;47:137-43. doi:10.1016/j.ocl.2015.08.014  
35  
36 419 19 Napolitano LM, Cohen MJ, Cotton BA, *et al.* Tranexamic acid in trauma. *J Trauma Acute*  
37  
38 420 *Care Surg* 2013;74:1575-86. doi:10.1097/TA.0b013e318292cc54  
39  
40 421 20 CRASH-2 trial collaborators, Shakur H, Roberts I, *et al.* Effects of tranexamic acid on death,  
41  
42 422 vascular occlusive events, and blood transfusion in trauma patients with significant  
43  
44 423 haemorrhage (CRASH-2): a randomised, placebo-controlled trial. *Lancet* 2010;376:23-32.  
45  
46 424 doi:10.1016/S0140-6736(10)60835-5  
47  
48 425 21 Adravanti P, Di Salvo E, Calafiore G, *et al.* A prospective, randomized, comparative study of  
49  
50 426 intravenous alone and combined intravenous and intraarticular administration of tranexamic  
51  
52 427 acid in primary total knee replacement. *Arthroplast Today* 2018;4:85-8.  
53  
54 428 doi:10.1016/j.artd.2017.08.004  
55  
56 429 22 Prakash J, Seon JK, Park YJ, *et al.* A randomized control trial to evaluate the effectiveness of  
57  
58 430 intravenous, intraarticular and topical wash regimes of tranexamic acid in primary total knee  
59  
60 431 arthroplasty. *J Orthop Surg* 2017;25:1-7. doi:10.1177/2309499017693529  
432 23 Mao Z, Yue B, Wang Y, *et al.* A comparative, retrospective study of peri-articular and

- 1  
2  
3  
4 433 intra-articular injection of tranexamic acid for the management of postoperative blood loss  
5 434 after total knee arthroplasty. *BMC Musculoskelet Disord* 2016;17:1-8.  
6  
7 435 doi:10.1186/s12891-016-1293-3  
8  
9 436 24 Jansen JA, Lameijer JRC, Snoeker BAM. Combined intravenous, topical and oral tranexamic  
10  
11 437 acid administration in total knee replacement: Evaluation of safety in patients with previous  
12  
13 438 thromboembolism and effect on hemoglobin level and transfusion rate. *Knee*  
14  
15 439 2017;24:1206-12. doi:10.1016/j.knee.2017.07.004  
16  
17 440 25 Lei Y, Xie J, Xu B, *et al.* The efficacy and safety of multiple-dose intravenous tranexamic  
18  
19 441 acid on blood loss following total knee arthroplasty: a randomized controlled trial. *Int Orthop*  
20  
21 442 2017;41:2053-9. doi:10.1007/s00264-017-3519-x  
22  
23 443 26 Zhen Y, Zongke Z, Fuxing P, *et al.* Chinese Hip and Total Knee Arthroplasty Surgery  
24  
25 444 Perioperative Anti-fibrinolytic Drug Sequential Anticoagulant Application Programme  
26  
27 445 Expert  
28  
29 446 Consensus. *Chinese Journal of Bone and Joint Surgery* 2015;8:281-5.  
30  
31 447 doi:10.3969/j.issn.2095-9958.2015.04-001  
32  
33 448 27 Xie J, Hu Q, Huang Z, *et al.* Comparison of three routes of administration of tranexamic acid  
34  
35 449 in primary unilateral total knee arthroplasty: Analysis of a national database. *Thromb Res*  
36  
37 450 2019;173:96-101. doi:10.1016/j.thromres.2018.11.025  
38  
39 451 28 Yue C, Kang P, Yang P, *et al.* Topical application of tranexamic acid in primary total hip  
40  
41 452 arthroplasty: A randomized double-blind controlled trial. *J Arthroplasty* 2014;29:2452-6.  
42  
43 453 doi:10.1016/j.arth.2014.03.032  
44  
45 454 29 Liu W, Yang C, Huang X, *et al.* Tranexamic Acid Reduces Occult Blood Loss, Blood  
46  
47 455 Transfusion, and Improves Recovery of Knee Function after Total Knee Arthroplasty: A  
48  
49 456 Comparative Study. *J Knee Surg* 2018;31:239-46. doi:10.1055/s-0037-1602248  
50  
51 457 30 Yang Y, Lv YM, Ding PJ, *et al.* The reduction in blood loss with intra-articular injection of  
52  
53 458 tranexamic acid in unilateral total knee arthroplasty without operative drains: A randomized  
54  
55 459 controlled trial. *Eur J Orthop Surg Traumatol* 2015;25:135-9.  
56  
57 460 doi:10.1007/s00590-014-1461-9  
58  
59 461 31 Young B, Moondi P. A questionnaire-based survey investigating the current use of  
60  
462 tranexamic acid in traumatic haemorrhage and elective hip and knee arthroplasty. *JRSM*

- 1  
2  
3  
4 463 *Open* 2014;5:204253331351694. doi:10.1177/2042533313516949
- 5  
6 464 32 Cid J, Lozano M. Tranexamic acid reduces allogeneic red cell transfusions in patients  
7  
8 465 undergoing total knee arthroplasty: Results of a meta-analysis of randomized controlled  
9  
10 466 trials. *Transfusion* 2005;45:1302-7. doi:10.1111/j.1537-2995.2005.00204.x
- 11  
12 467 33 Blanié A, Bellamy L, Rhayem Y, *et al.* Duration of postoperative fibrinolysis after total hip  
13  
14 468 or knee replacement: A laboratory follow-up study. *Thromb Res* 2013;131:e6-11.  
15  
16 469 doi:10.1016/j.thromres.2012.11.006
- 17  
18 470 34 Hunt BJ. The current place of tranexamic acid in the management of bleeding. *Anaesthesia*  
19  
20 471 2015;70:e18-53. doi:10.1111/anae.12910
- 21  
22 472 35 Demos HA, Lin ZX, Barfield WR, *et al.* Process Improvement Project Using Tranexamic  
23  
24 473 Acid Is Cost-Effective in Reducing Blood Loss and Transfusions After Total Hip and Total  
25  
26 474 Knee Arthroplasty. *J Arthroplasty* 2017;32:2375-80. doi:10.1016/j.arth.2017.02.068
- 27  
28 475 36 Tang Y, Wen Y, Li W, *et al.* The efficacy and safety of multiple doses of oral tranexamic  
29  
30 476 acid on blood loss, inflammatory and fibrinolysis response following total knee arthroplasty:  
31  
32 477 A randomized controlled trial. *Int J Surg* 2019;65:45-51. doi:10.1016/j.ijsu.2019.03.011
- 33  
34 478 37 Silman A J. The 1987 revised American Rheumatism Association criteria for rheumatoid  
35  
36 479 arthritis. *Br. J. Rheumatol* 1988;27:341-3. doi:10.1093/rheumatology/27.5.341
- 37  
38 480 38 Britsemmer K, Ursum J, Gerritsen M, *et al.* Validation of the 2010 ACR/EULAR  
39  
40 481 classification criteria for rheumatoid arthritis: Slight improvement over the 1987 ACR  
41  
42 482 criteria. *Ann Rheum Dis* 2011;70:1468-70. doi:10.1136/ard.2010.148619
- 43  
44 483 39 Kohn MD, Sassoon AA, Fernando ND. Classifications in Brief: Kellgren-Lawrence  
45  
46 484 Classification of Osteoarthritis. *Clin Orthop Relat Res* 2016;474:1886-93.  
47  
48 485 doi:10.1007/s11999-016-4732-4
- 49  
50 486 40 Krause ML, Matteson EL. Perioperative management of the patient with rheumatoid arthritis.  
51  
52 487 *World J Orthop* 2014;5:283-91. doi:10.5312/wjo.v5.i3.283
- 53  
54 488 41 Thorsness RJ, Hammert WC. Perioperative management of rheumatoid medications. *J Hand*  
55  
56 489 *Surg Am* 2012;37:1928-31. doi:10.1016/j.jhsa.2012.04.015
- 57  
58 490 42 Lee JT. Commentary on the "Guideline for Prevention of Surgical Site Infection, 1999".  
59  
60 491 *American Journal of Infection Control* 1999;27:96. doi:10.1016/S0196-6553(99)70094-5
- 492 493 Nadler SB, Hidalgo JH, Bloch T. Prediction of blood volume in normal human adults.

- 1  
2  
3  
4 493 *Surgery* 1962;51:224-32. doi:<http://dx.doi.org/>
- 5  
6 494 44 Gross JB. Estimating allowable blood loss: Corrected for dilution. *Anesthesiology*  
7  
8 495 1983;58:277-80. doi:10.1097/00000542-198303000-00016
- 9  
10 496 45 Park JH, Choi SW, Shin EH, *et al.* The optimal protocol to reduce blood loss and blood  
11  
12 497 transfusion after unilateral total knee replacement: Low-dose IA-TXA plus 30-min drain  
13  
14 498 clamping versus drainage clamping for the first 3 h without IA-TXA. *J Orthop Surg*  
15  
16 499 2017;25:1-7. doi:10.1177/2309499017731626
- 17  
18 500 46 Voorn VMA, Marang-van de Mheen PJ, van der Hout A, *et al.* The effectiveness of a  
19  
20 501 de-implementation strategy to reduce low-value blood management techniques in primary hip  
21  
22 502 and knee arthroplasty: A pragmatic cluster-randomized controlled trial. *Implement Sci*  
23  
24 503 2017;12:72. doi:10.1186/s13012-017-0601-0
- 25  
26 504 47 Mi B, Liu G, Lv H, *et al.* Is combined use of intravenous and intraarticular tranexamic acid  
27  
28 505 superior to intravenous or intraarticular tranexamic acid alone in total knee arthroplasty? A  
29  
30 506 meta-analysis of randomized controlled trials. *J Orthop Surg Res* 2017;12:1-9.  
31  
32 507 doi:10.1186/s13018-017-0559-2
- 33  
34 508 48 Iseki T, Tsukada S, Wakui M, *et al.* Intravenous tranexamic acid only versus combined  
35  
36 509 intravenous and intra-articular tranexamic acid for perioperative blood loss in patients  
37  
38 510 undergoing total knee arthroplasty. *Eur J Orthop Surg Traumatol* 2018;28:1397-402.  
39  
40 511 doi:10.1007/s00590-018-2210-2
- 41  
42 512 49 Li J, Ny A, Leonardsson G, *et al.* The plasminogen activator/plasmin system is essential for  
43  
44 513 development of the joint inflammatory phase of collagen type II-induced arthritis. *Am J*  
45  
46 514 *Pathol* 2005;166:783-92. doi:10.1016/S0002-9440(10)62299-7
- 47  
48 515 50 Goh GSH, Liow MHL, Razak HRBA, *et al.* Patient-Reported Outcomes, Quality of  
49  
50 516 Life, and Satisfaction Rates in Young Patients Aged 50 Years or Younger After Total Knee  
51  
52 517 Arthroplasty. *J Arthroplasty* 2017;32:419-25. doi:10.1016/j.arth.2016.07.043
- 53  
54 518 51 Boyd JA, Gradisar IM. Total knee arthroplasty after knee arthroscopy in patients older than  
55  
56 519 50 years. *Orthopedics* 2016;39:e1041-4. doi:10.3928/01477447-20160719-01

57  
58  
59 521 Figure 1: The study flow diagram, including participants recruitment, eligibility,  
60

1  
2  
3  
4 522 screening, randomisation, allocation concealment and outcome assessments. TXA,  
5  
6 523 tranexamic acid; D1, the 1<sup>st</sup> day after surgery; D3, the 3<sup>rd</sup> day after surgery; D7, the 7<sup>th</sup>  
7  
8  
9 524 day after surgery; D14, the 14<sup>th</sup> day after surgery.  
10  
11  
12  
13  
14  
15  
16  
17  
18  
19  
20  
21  
22  
23  
24  
25  
26  
27  
28  
29  
30  
31  
32  
33  
34  
35  
36  
37  
38  
39  
40  
41  
42  
43  
44  
45  
46  
47  
48  
49  
50  
51  
52  
53  
54  
55  
56  
57  
58  
59  
60

For peer review only

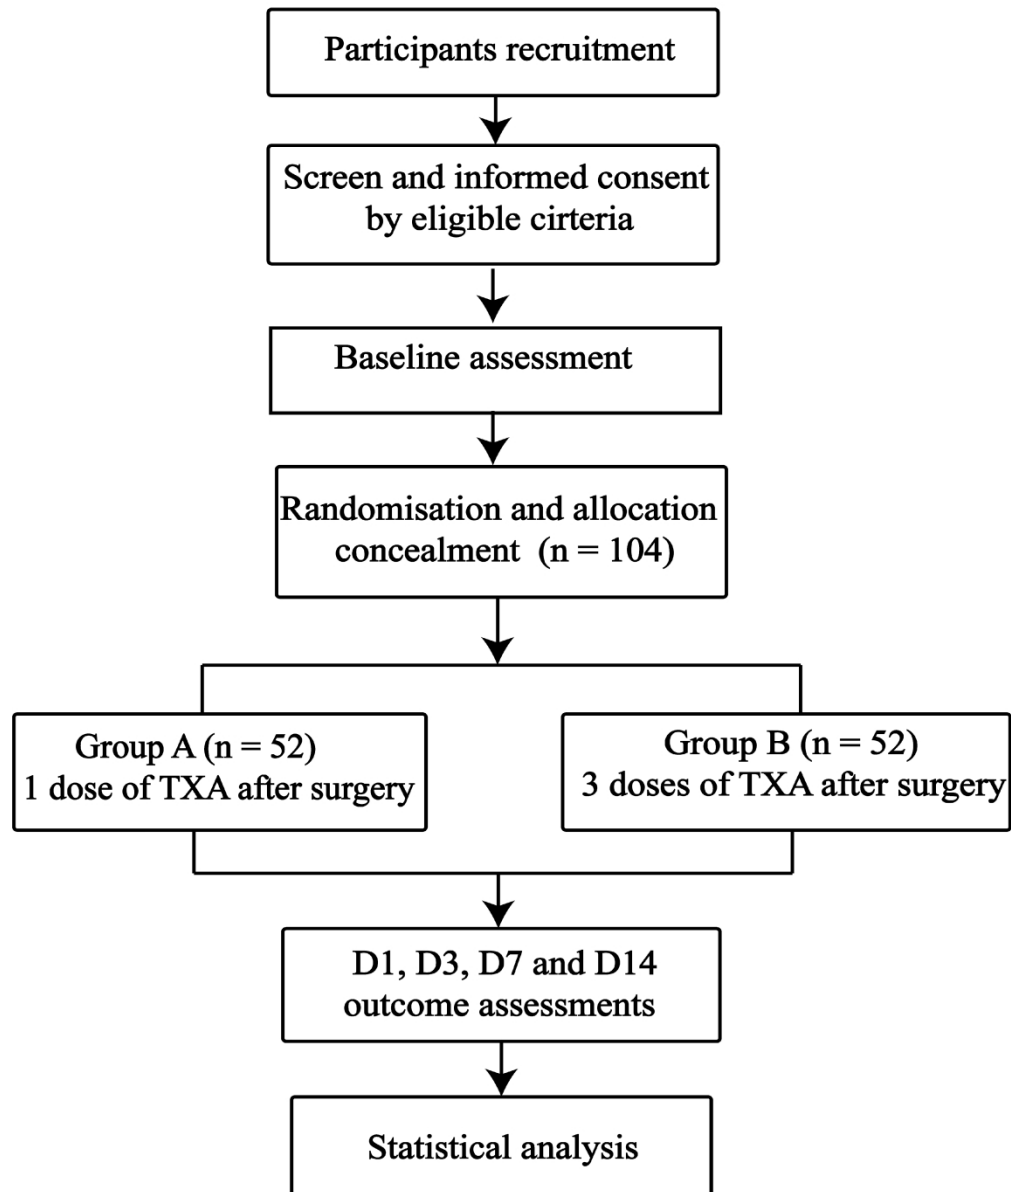

Figure 1: The study flow diagram, including participants recruitment, eligibility, screening, randomisation, allocation concealment and outcome assessments. TXA, tranexamic acid; D1, the 1st day after surgery; D3, the 3rd day after surgery; D7, the 7th day after surgery; D14, the 14th day after surgery.

# BMJ Open

## Multiple-dose tranexamic acid for perioperative blood loss in total knee arthroplasty in patients with rheumatoid arthritis : A single-blinded, randomized, parallel-controlled study protocol in China

|                                 |                                                                                                                                                                                                                                                                                                                                                                                                                                                                                                                                                                                                                                                                                                                                                                                                                                                                                                                                                                                                                                                                                                                                                                                                                                                                                                                                                                                                                                                                                                                                                                                                                                                                                                                                                                  |
|---------------------------------|------------------------------------------------------------------------------------------------------------------------------------------------------------------------------------------------------------------------------------------------------------------------------------------------------------------------------------------------------------------------------------------------------------------------------------------------------------------------------------------------------------------------------------------------------------------------------------------------------------------------------------------------------------------------------------------------------------------------------------------------------------------------------------------------------------------------------------------------------------------------------------------------------------------------------------------------------------------------------------------------------------------------------------------------------------------------------------------------------------------------------------------------------------------------------------------------------------------------------------------------------------------------------------------------------------------------------------------------------------------------------------------------------------------------------------------------------------------------------------------------------------------------------------------------------------------------------------------------------------------------------------------------------------------------------------------------------------------------------------------------------------------|
| Journal:                        | <i>BMJ Open</i>                                                                                                                                                                                                                                                                                                                                                                                                                                                                                                                                                                                                                                                                                                                                                                                                                                                                                                                                                                                                                                                                                                                                                                                                                                                                                                                                                                                                                                                                                                                                                                                                                                                                                                                                                  |
| Manuscript ID                   | bmjopen-2019-034431.R5                                                                                                                                                                                                                                                                                                                                                                                                                                                                                                                                                                                                                                                                                                                                                                                                                                                                                                                                                                                                                                                                                                                                                                                                                                                                                                                                                                                                                                                                                                                                                                                                                                                                                                                                           |
| Article Type:                   | Protocol                                                                                                                                                                                                                                                                                                                                                                                                                                                                                                                                                                                                                                                                                                                                                                                                                                                                                                                                                                                                                                                                                                                                                                                                                                                                                                                                                                                                                                                                                                                                                                                                                                                                                                                                                         |
| Date Submitted by the Author:   | 23-May-2020                                                                                                                                                                                                                                                                                                                                                                                                                                                                                                                                                                                                                                                                                                                                                                                                                                                                                                                                                                                                                                                                                                                                                                                                                                                                                                                                                                                                                                                                                                                                                                                                                                                                                                                                                      |
| Complete List of Authors:       | <p>Kang, Bing-xin; Guanghua Hospital of Integrated Traditional Chinese Medicine and Western Medicine, Shanghai University of Traditional Chinese Medicine, Orthopaedics</p> <p>Xu, Hui; Guanghua Hospital of Integrated Traditional Chinese Medicine and Western Medicine, Shanghai University of Traditional Chinese Medicine, Orthopaedics</p> <p>Gao, Chen-xin; Guanghua Hospital of Integrated Traditional Chinese Medicine and Western Medicine, Shanghai University of Traditional Chinese Medicine, Orthopaedics</p> <p>Zhong, Sheng; Guanghua Hospital of Integrated Traditional Chinese Medicine and Western Medicine, Shanghai University of Traditional Chinese Medicine, Orthopaedics</p> <p>Zhang, Jing; Guanghua Hospital of Integrated Traditional Chinese Medicine and Western Medicine, Shanghai University of Traditional Chinese Medicine, Orthopaedics</p> <p>Xie, Jun; Guanghua Hospital of Integrated Traditional Chinese Medicine and Western Medicine, Shanghai University of Traditional Chinese Medicine, Orthopaedics</p> <p>Sun, Song-tao ; Guanghua Hospital of Integrated Traditional Chinese Medicine and Western Medicine, Shanghai University of Traditional Chinese Medicine, Orthopaedics</p> <p>Ma, Ying-hui; Guanghua Hospital of Integrated Traditional Chinese Medicine and Western Medicine, Shanghai University of Traditional Chinese Medicine, Orthopaedics</p> <p>Zhai, Wei-tao; Guanghua Hospital of Integrated Traditional Chinese Medicine and Western Medicine, Shanghai University of Traditional Chinese Medicine, Orthopaedics</p> <p>Xiao, Lian-bo; Guanghua Hospital of Integrated Traditional Chinese Medicine and Western Medicine, Shanghai University of Traditional Chinese Medicine, Orthopaedics</p> |
| <b>Primary Subject Heading</b>: | Medical management                                                                                                                                                                                                                                                                                                                                                                                                                                                                                                                                                                                                                                                                                                                                                                                                                                                                                                                                                                                                                                                                                                                                                                                                                                                                                                                                                                                                                                                                                                                                                                                                                                                                                                                                               |
| Secondary Subject Heading:      | Surgery                                                                                                                                                                                                                                                                                                                                                                                                                                                                                                                                                                                                                                                                                                                                                                                                                                                                                                                                                                                                                                                                                                                                                                                                                                                                                                                                                                                                                                                                                                                                                                                                                                                                                                                                                          |
| Keywords:                       | tranexamic acid, total knee arthroplasty, perioperative blood management, Knee < ORTHOPAEDIC & TRAUMA SURGERY, Paediatric                                                                                                                                                                                                                                                                                                                                                                                                                                                                                                                                                                                                                                                                                                                                                                                                                                                                                                                                                                                                                                                                                                                                                                                                                                                                                                                                                                                                                                                                                                                                                                                                                                        |

1  
2  
3  
4  
5  
6  
7  
8  
9  
10  
11  
12  
13  
14  
15  
16  
17  
18  
19  
20  
21  
22  
23  
24  
25  
26  
27  
28  
29  
30  
31  
32  
33  
34  
35  
36  
37  
38  
39  
40  
41  
42  
43  
44  
45  
46  
47  
48  
49  
50  
51  
52  
53  
54  
55  
56  
57  
58  
59  
60

|  |                                             |
|--|---------------------------------------------|
|  | orthopaedics < ORTHOPAEDIC & TRAUMA SURGERY |
|  |                                             |

SCHOLARONE™  
Manuscripts





I, the Submitting Author has the right to grant and does grant on behalf of all authors of the Work (as defined in the below author licence), an exclusive licence and/or a non-exclusive licence for contributions from authors who are: i) UK Crown employees; ii) where BMJ has agreed a CC-BY licence shall apply, and/or iii) in accordance with the terms applicable for US Federal Government officers or employees acting as part of their official duties; on a worldwide, perpetual, irrevocable, royalty-free basis to BMJ Publishing Group Ltd ("BMJ") its licensees and where the relevant Journal is co-owned by BMJ to the co-owners of the Journal, to publish the Work in this journal and any other BMJ products and to exploit all rights, as set out in our [licence](#).

The Submitting Author accepts and understands that any supply made under these terms is made by BMJ to the Submitting Author unless you are acting as an employee on behalf of your employer or a postgraduate student of an affiliated institution which is paying any applicable article publishing charge ("APC") for Open Access articles. Where the Submitting Author wishes to make the Work available on an Open Access basis (and intends to pay the relevant APC), the terms of reuse of such Open Access shall be governed by a Creative Commons licence – details of these licences and which [Creative Commons](#) licence will apply to this Work are set out in our licence referred to above.

Other than as permitted in any relevant BMJ Author's Self Archiving Policies, I confirm this Work has not been accepted for publication elsewhere, is not being considered for publication elsewhere and does not duplicate material already published. I confirm all authors consent to publication of this Work and authorise the granting of this licence.

1  
2  
3  
4 1 **Multiple-dose tranexamic acid for perioperative blood loss in total knee**  
5  
6 2 **arthroplasty in patients with rheumatoid arthritis : A single-blinded,**  
7  
8 3 **randomized, parallel-controlled study protocol in China**

11 4 Bing-xin Kang\*, Hui Xu\*, Chen-xin Gao, Sheng Zhong, Jing Zhang, Jun Xie,  
12  
13  
14 5 Song-tao Sun, Ying-hui Ma, Wei-tao Zhai, Lian-bo Xiao

16  
17 6 **Author Affiliations:**

18  
19 7 Bing-xin Kang, MD, Department of Orthopaedics, Guanghua Hospital of Integrated  
20  
21  
22 8 Traditional Chinese Medicine and Western Medicine, Shanghai University of  
23  
24 9 Traditional Chinese Medicine, Shanghai, China, 15738314790@163.com

25  
26  
27 10 Hui Xu, MD, Department of Orthopaedics, Guanghua Hospital of Integrated  
28  
29  
30 11 Traditional Chinese Medicine and Western Medicine, Shanghai University of  
31  
32 12 Traditional Chinese Medicine, Shanghai, China, 1511911882@qq.com

33  
34  
35 13 Chen-xin Gao, MD, Department of Orthopaedics, Guanghua Hospital of Integrated  
36  
37  
38 14 Traditional Chinese Medicine and Western Medicine, Shanghai University of  
39  
40 15 Traditional Chinese Medicine, Shanghai, China, 706046133@qq.com

41  
42  
43 16 Sheng Zhong, MD, Department of Orthopaedics, Guanghua Hospital of Integrated  
44  
45  
46 17 Traditional Chinese Medicine and Western Medicine, Shanghai University of  
47  
48 18 Traditional Chinese Medicine, Shanghai, China, drcyan@foxmail.com

49  
50  
51 19 Jing Zhang, MD, Department of Orthopaedics, Guanghua Hospital of Integrated  
52  
53  
54 20 Traditional Chinese Medicine and Western Medicine, Shanghai University of  
55  
56 21 Traditional Chinese Medicine, Shanghai, China, franksamo@126.com

57  
58 22 Jun Xie, MD, Department of Orthopaedics, Guanghua Hospital of Integrated  
59  
60

1  
2  
3  
4 23 Traditional Chinese Medicine and Western Medicine, Shanghai University of  
5  
6  
7 24 Traditional Chinese Medicine, Shanghai, China, leoxie199@126.com  
8  
9 25 Song-tao Sun, MD, Department of Orthopaedics, Guanghua Hospital of Integrated  
10  
11  
12 26 Traditional Chinese Medicine and Western Medicine, Shanghai University of  
13  
14  
15 27 Traditional Chinese Medicine, Shanghai, China, sstever0156258@aliyun.com  
16  
17 28 Ying-hui Ma, MD, Department of Orthopaedics, Guanghua Hospital of Integrated  
18  
19  
20 29 Traditional Chinese Medicine and Western Medicine, Shanghai University of  
21  
22  
23 30 Traditional Chinese Medicine, Shanghai, China, mayinghui021@126.com  
24  
25 31 Wei-tao Zhai, MD, Department of Orthopaedics, Guanghua Hospital of Integrated  
26  
27  
28 32 Traditional Chinese Medicine and Western Medicine, Shanghai University of  
29  
30  
31 33 Traditional Chinese Medicine, Shanghai, China, 13901808309@163.com  
32  
33 34 Lian-bo Xiao, MD, Department of Orthopaedics, Guanghua Hospital of Integrated  
34  
35  
36 35 Traditional Chinese Medicine and Western Medicine, Shanghai University of  
37  
38  
39 36 Traditional Chinese Medicine, Shanghai, China, 13701888178@163.com  
40  
41 37 Bing-xin Kang and Hui Xu contributed equally to this paper.

### 42 **Corresponding Author**

43  
44  
45 39 Lian-bo Xiao, PhD, Guanghua Hospital of Integrated Traditional Chinese Medicine  
46  
47  
48 40 and Western Medicine, Shanghai University of Traditional Chinese Medicine. NO.  
49  
50  
51 41 540 Xinhua Road, Changning District, Shanghai (CN 200052), China,  
52  
53 42 13701888178@163.com; +8613701888178

### 54 55 56 57 58 59 60 **ABSTRACT**

1  
2  
3  
4 46 **Introduction** This clinical trial is designed to evaluate the effect of multiple-dose  
5  
6 47 tranexamic acid (TXA) on perioperative blood loss in patients with rheumatoid  
7  
8  
9 48 arthritis (RA).

10  
11 49 **Methods and analysis** A randomized, single-blinded, parallel-controlled study will  
12  
13  
14 50 be designed. RA patients (age 50-75 years) undergoing unilateral primary end-stage  
15  
16  
17 51 total knee arthroplasty will be randomly divided into Group A or Group B. Group A  
18  
19  
20 52 will be treated with one dose of TXA (1 g; intravenous injection 3 hours post-surgery)  
21  
22  
23 53 and Group B with three doses (1 g; intravenous injection at 3, 6, and 12 hours  
24  
25 54 post-surgery) after surgery. The primary outcomes will be evaluated with blood loss,  
26  
27 55 maximum haemoglobin drop, and transfusion rate. The secondary outcomes will be  
28  
29  
30 56 evaluated with knee function and complications.

31  
32 57 **Ethics and dissemination** The Shanghai Guanghua Hospital of Integrated Traditional  
33  
34  
35 58 Chinese Medicine and Western Medicine Ethics Committee approved in this study in  
36  
37  
38 59 July 2019. Informed consent will be obtained from all participants. Results of the trial  
39  
40  
41 60 will be published in the Dryad and repository in a peer-reviewed journal. Additionally,  
42  
43  
44 61 deidentified data collected and analysed for this study will be available for review  
45  
46  
47 62 from the corresponding author on reasonable request.

48 63 **Trial registration number** ChiCTR1900025013; Pre-results.

49  
50  
51 64  
52  
53 65  
54  
55  
56 66 **Article Summary**

57  
58 67 Strengths and limitations of this trial  
59  
60

1  
2  
3  
4 68 (1) This is the first study in China to evaluate the efficacy and safety of a  
5  
6 69 perioperative multiple-dose regimen of tranexamic acid during total knee arthroplasty  
7  
8  
9 70 in rheumatoid arthritis patients.

10  
11 71 (2) The bias of this study was reduced dramatically by the extensive study design,  
12  
13  
14 72 which included proper randomization, allocation concealment, and objective  
15  
16  
17 73 indications.

18  
19 74 (3) If multiple-dose TXA after surgery can reduce postoperative blood loss in  
20  
21  
22 75 rheumatoid arthritis patients without adverse events, this medication regimen may  
23  
24  
25 76 reduce the occurrence of postoperative anaemia in rheumatoid arthritis patients.

26  
27 77 (4) The short follow-up time may be insufficient in fully assessing the risk of  
28  
29  
30 78 complications in a multiple-dose regimen of tranexamic acid during total knee  
31  
32  
33 79 arthroplasty in rheumatoid arthritis patients.

34  
35 80

36  
37  
38 81

## 39 40 82 **INTRODUCTION**

41  
42  
43 83 Rheumatoid arthritis (RA) may be accompanied by haematological diseases such as  
44  
45 84 anaemia.<sup>[1]</sup> The overall prevalence of RA is 0.5-1% in Europe and North America,  
46  
47  
48 85 0.31% in France, 0.32-0.38% in China, and 0.02-0.047% in Japan.<sup>[2,3]</sup> Total knee  
49  
50  
51 86 arthroplasty (TKA) is effective in treating flexion contractures and maintaining the  
52  
53  
54 87 stability of knees effected by RA.<sup>[4]</sup> About 0.005% of RA patients receive TKA, a rate  
55  
56  
57 88 that has gradually decreased over the past decades. However, surgery remains the first  
58  
59  
60 89 choice for articular deformity and pain, despite the fact that disease-modifying

1  
2  
3  
4 90 antirheumatic drugs and biologics agents can manage synovitis-related symptoms in  
5  
6 91 RA patients.<sup>[5]</sup> Haemorrhage is a major perioperative complication of TKA.<sup>[6]</sup>  
7  
8  
9 92 Excessive blood loss should be treated with an allogeneic blood transfusion, but this  
10  
11 93 has adverse effects such as immune complications, prolong hospitalization time, and  
12  
13  
14 94 increased infection rate.<sup>[7,8]</sup> Haemoglobin has a negative correlation with disease  
15  
16  
17 95 activity in RA.<sup>[9]</sup> Therefore, we believe that perioperative blood loss management is  
18  
19  
20 96 needed for patients with RA.

21  
22 97 Accounting for approximately 50% of the total blood loss, hidden blood loss (HBL)  
23  
24 98 is the blood lost as infiltrates into the tissue intraoperatively and postoperatively. This  
25  
26  
27 99 blood resides in the knee joint cavity before being haemolyzed.<sup>[10]</sup> HBL often leads to  
28  
29  
30 100 the joint swelling, postoperative inflammation, and pain.<sup>[11,12]</sup>

31  
32 101 Use of a surgical tourniquet can reduce intraoperative bleeding,<sup>[13]</sup> provide a clear  
33  
34  
35 102 view during the surgery, and facilitate the connection between the cement, bone and  
36  
37  
38 103 joint prostheses.<sup>[14]</sup> However, after the release of the tourniquet, local tissue may be  
39  
40  
41 104 damaged by ischemic reperfusion injury, and the fibrinolytic system may be  
42  
43  
44 105 activated.<sup>[15,16]</sup> As a consequence, peripheral blood circulation can be accelerated,  
45  
46  
47 106 plasma fibrinolysis enhanced, and postoperative HBL increased.<sup>[15]</sup> Therefore,  
48  
49  
50 107 reducing the dissolution of fibrin can reduce postoperative HBL.<sup>[17]</sup>

51 108 Tranexamic acid (TXA) is a synthetic lysine derivative that competitively inhibits  
52  
53 109 the binding between plasminogen and fibrin, prevents the activation of plasminogen,  
54  
55  
56 110 and protects fibrin from degradation and dissolution by plasmin. TXA was initially  
57  
58  
59 111 used in obstetric and gynaecologic surgery, and its use was then gradually replicated  
60

1  
2  
3  
4 112 in other surgeries to reduce bleeding and blood transfusion rates.<sup>[18,19]</sup> The CRASH-2  
5  
6 113 trial has demonstrated the effectiveness and safety of TXA in reducing blood loss.<sup>[20]</sup>  
7  
8  
9 114 A large amount of literature has reported that TXA can significantly reduce peri-TKA  
10  
11 115 blood loss.<sup>[21-25]</sup> Currently, TXA is recommended for perioperative management of  
12  
13 116 blood loss during TKA.<sup>[26]</sup> However, its efficacy and safety in RA patients undergoing  
14  
15 117 TKA has rarely been reported.<sup>[27]</sup> TXA can be administered through oral intake, a  
16  
17 118 single large-dose intravenous injection, an intra-articular injection, joint cavity  
18  
19 119 irrigation, postoperative drainage tube injection, or through a combination of these  
20  
21 120 methods.<sup>[25,28-30]</sup> There is no consensus on the optimal dosage and timing of  
22  
23 121 perioperative TXA administration for TKA.<sup>[18,31,32]</sup> Studies have shown that  
24  
25 122 fibrinolysis peaks at 6 hours and continues for approximately 18 hours after TKAs  
26  
27 123 that were performed with tourniquets.<sup>[33]</sup> The half-life of TXA in the plasma is 2  
28  
29 124 hours, and its concentration peaks at 1 hour after injection.<sup>[34]</sup> Thus, we suspect that a  
30  
31 125 single dose of TXA may not be sufficient to exert an anti-fibrinolytic effect. There are  
32  
33 126 also studies suggesting that, for patients with osteoarthritis, higher doses (within the  
34  
35 127 normal range) during the perioperative period can increase the efficacy of TXA.<sup>[35,36]</sup>  
36  
37 128 The purpose of this clinical trial is to verify the effectiveness and safety of multiple  
38  
39 129 doses of TXA in reducing perioperative blood loss in RA patients treated with TKA,  
40  
41 130 in order to determine a new strategy for management of perioperative blood loss  
42  
43 131 during TKA.  
44  
45  
46  
47  
48  
49  
50  
51  
52  
53  
54  
55  
56  
57  
58  
59  
60

## 134 **METHODS AND ANALYSIS**

1  
2  
3  
4 **135 Study context**

5  
6 136 This clinical trial was initiated on 1 September 2019 in the wards of Guanghua  
7  
8  
9 137 Hospital of Integrated Traditional Chinese Medicine and Western Medicine, Shanghai  
10  
11 138 University of Traditional Chinese Medicine (Shanghai, China). The annual number of  
12  
13  
14 139 TKA cases performed in RA patients was about 300 in 2018. Eleven investigators will  
15  
16  
17 140 be involved in this study including 2 senior orthopaedic surgeons (L-bX, W-tZ) with  
18  
19  
20 141 20 years of clinical experience, 6 orthopaedic physicians (C-xG, JZ, JX, S-sT, Y-hM,  
21  
22 142 and SZ), 2 data collectors who are also statisticians (B-xK and HX), and a nurse  
23  
24  
25 143 (X-rX). Informed consent will be obtained from all patients. The perioperative ERAS  
26  
27  
28 144 blood management programme and the trial flow chart are shown in Table 1 and  
29  
30 145 Figure 1. The schedule is shown in Table 2.

31  
32 **Table 1** Enhanced recovery after surgery blood management

33  
34 Preoperative

35  
36 1 Treatment of haemorrhagic primary disease

37  
38 2 Nutritional guidance, balanced diet

39  
40 3 Iron application

41  
42 4 Rhu-Epo application

43  
44 Intraoperative

45  
46 5 Minimally invasive surgery

47  
48 6 Tourniquet optimization

49  
50 7 Controlled buck

51  
52 8 Autologous blood return

53  
54 9 Use of tranexamic acid

55  
56 Postoperative

57  
58 10 Reduce bleeding (pressure dressing of wounds, prevent stress ulcers)

59  
60



## 11 Nutritional support, iron supplementation, use of Rhu-Epo

Rhu-Epo, recombinant human erythropoietin.

146

**Table 2** The schedule of trial enrolment, interventions, and assessments

|                                                | Outcome assessment |    |    |    |     |
|------------------------------------------------|--------------------|----|----|----|-----|
|                                                | Pre-OP             | D1 | D3 | D7 | D14 |
| Enrolment                                      | •                  |    |    |    |     |
| Assessment of eligibility                      | •                  |    |    |    |     |
| Randomisation                                  | •                  |    |    |    |     |
| Group A                                        |                    |    |    |    |     |
| Post-OP 1 dose of TXA                          | •                  | •  | •  | •  | •   |
| Group B                                        |                    |    |    |    |     |
| Post-OP 3 doses of TXA                         | •                  | •  | •  | •  | •   |
| HBL                                            |                    | •  | •  | •  | •   |
| Haemoglobin level                              | •                  | •  | •  | •  | •   |
| Inflammatory index                             | •                  | •  | •  | •  | •   |
| Inflammatory factor                            | •                  | •  | •  | •  | •   |
| Coagulation index                              | •                  | •  | •  | •  | •   |
| Swelling rate                                  |                    | •  | •  | •  | •   |
| DVT                                            |                    | •  | •  | •  | •   |
| PE                                             |                    | •  | •  | •  | •   |
| Postoperative complications and adverse events |                    | •  | •  | •  | •   |

OP, operative; TXA, tranexamic acid; HBL, hidden blood loss; DVT, deep vein thrombosis; PE, pulmonary embolism; D1, the 1<sup>st</sup> day after surgery; D3, the 3<sup>rd</sup> day after surgery; D7, the 7<sup>th</sup> day after surgery; D14, the 14<sup>th</sup> day after surgery.

147

### 148 **Sample size calculation**

149 This study uses a completely randomized trial design. Multiple sample sizes will  
150 evaluated by a review of previously conducted clinical research.<sup>[25]</sup> The primary  
151 outcome will be measured with the amount of HBL, dependent on TXA therapy. The  
152 overall standard deviation is  $\sigma = 250$ , and the allowable error estimate is  $\delta = 200$ .

153 These values were estimated using the statistical formula  $n_1 = n_2 = 2 \times \left[ \frac{(Z_{\alpha/2} + Z_{\beta})/\sigma}{\delta} \right]^2$ .

154 Predicting an estimated dropout rate of 10%, 104 subjects will be required to yield a  
155 power of 90% with a significance level of 0.05.

### 157 **Randomization and allocation concealment**

158 Patients will be randomly assigned to two groups (1:1 ratio). This will be done by  
159 assigning each patient a number from 1 to 104. SPSS version 25.0 (IBM Corporation,  
160 Armonk, NY) will be used to generate a random sequence containing the numbers 1  
161 to 104, dividing these numbers in two groups. These group lists will be placed in an  
162 opaque envelope and put into a computer by encryption. The group data will be saved  
163 by the statistician. Only the nurse will be allowed to check the enrolment and give the  
164 corresponding treatment.

### 166 **Single-blinded design**

167 Only the nurse will be allowed to know the patients' enrolment and give them the  
168 corresponding treatment. The outcome evaluators will objectively record the patients'

1  
2  
3  
4 169 test results.  
5  
6

7 170  
8

9 171 **Eligibility criteria**

10  
11 172 The eligibility criteria have been set in accordance with the ‘American Rheumatism

12  
13  
14 173 Association criteria for rheumatoid arthritis’<sup>[37]</sup> and the 2010 ‘ACR/EULAR

15  
16  
17 174 classification criteria for rheumatoid arthritis’.<sup>[38]</sup> The eligibility criteria are as follows:

18  
19  
20 175 (1) The patient must have been diagnosed with RA in Stage III or IV according to the

21  
22 176 Kellgren-Lawrence classification;<sup>[39]</sup> (2) The patient must be 50 to 75 years old; (3)

23  
24 177 The patient must be willing to undergo the unilateral primary TKA; (4) The patient

25  
26  
27 178 must receive perioperative anti-fibrinolytic TXA therapy; and (5) The patient must

28  
29  
30 179 show normal blood-clotting function and must not have preoperative anaemia.  
31

32 180  
33

34 181 **Exclusion criteria**

35  
36  
37 182 The exclusion criteria are as follows: (1) Other types of arthritis (such as primary

38  
39  
40 183 arthritis, post-traumatic osteoarthritis, gouty osteoarthritis, haemophilic osteoarthritis,

41  
42 184 and tuberculous arthritis); (2) Bilateral knee arthroplasty (RA patients); (3) Severe

43  
44  
45 185 cardiovascular disease (such as myocardial infarction, atrial fibrillation, angina

46  
47  
48 186 pectoris, and cardiac failure) or cerebrovascular disease (such as cerebral infarction

49  
50  
51 187 and cerebral haemorrhage); and (4) Prolonged use of oral anticoagulant drugs (such as

52  
53 188 aspirin, warfarin, and clopidogrel).  
54

55 189

56  
57 190 **Elimination criteria**

58  
59  
60 191 The elimination criteria are as follows: (1) Acquired colour vision disorder; (2) Active

1  
2  
3  
4 192 intravascular coagulation patients; and (3) A history of seizures.  
5  
6

7 193  
8

#### 9 194 **Termination criteria**

10  
11 195 The termination criteria are as follows: (1) Shock; (2) Allergic symptoms such as  
12  
13  
14 196 itching and a rash; (3) Digestive disorders such as nausea, vomiting, loss of appetite,  
15  
16  
17 197 and diarrhoea after medication; (4) Symptoms such as reactive dermatitis, dizziness,  
18  
19  
20 198 hypotension, drowsiness, headache; convulsions, and visual impairment; and (5)  
21  
22 199 Adverse events such as intracranial thrombosis and intracranial haemorrhage after  
23  
24  
25 200 medication.  
26

27 201  
28

#### 29 202 **Perioperative anti-rheumatic treatment**

30  
31  
32 203 Methotrexate and hydroxychloroquine will be used during the perioperative period.  
33  
34 204 Leflunomide will be discontinued one week before surgery. Use of other  
35  
36  
37 205 disease-modifying antirheumatic drugs will be discontinued two days before surgery,  
38  
39  
40 206 and restarted 1-2 days after gastrointestinal function recovery. The use of newer  
41  
42  
43 207 biologic agents such as tumour necrosis factor alpha will be discontinued 4 to 5  
44  
45 208 half-lives before surgery and restarted after wound healing and infection  
46  
47 209 elimination.<sup>[40,41]</sup>  
48

49  
50 210  
51

#### 52 211 **Surgery and anaesthesia**

53  
54 212 Surgery will be performed by two senior surgeons (L-bX and W-tZ). During each  
55  
56  
57 213 surgery, a standard midline incision will be followed by a medial parapatellar capsular  
58  
59  
60 214 incision to expose the knee joint. A tourniquet will be used for all patients at a

1  
2  
3  
4 215 pressure of 200-250 mmHg. The operations will be conducted under general  
5  
6 216 anaesthesia and blood pressure will be controlled within a range of 80 to 100 mmHg /  
7  
8  
9 217 60 to 70 mmHg by anaesthetists throughout the surgical procedure. During the  
10  
11 218 operation, conventional anti-infective, combined analgesic, anti-inflammatory,  
12  
13 219 anti-coagulation treatment, and other symptomatic treatments will be administered  
14  
15 220 according to the 'Chinese Hip and Total Knee Arthroplasty Surgery Perioperative  
16  
17 221 Anti-fibrinolytic Drug Sequential Anticoagulant Application Programme Expert  
18  
19 222 Consensus'.<sup>[26]</sup> Ten minutes prior to skin incision, 1 g of TXA + 100 mL of  
20  
21 223 intravenous-saline will be administered, and then 1.5 g of TXA + 50 mL  
22  
23 224 articular-injection saline will be administered post-operatively into the sutured joint  
24  
25 225 cavity. Group A and B will then receive additional TXA therapy according to the  
26  
27 226 treatment regime devised for each group.  
28  
29  
30  
31  
32  
33  
34

35 227 TXA is produced by Hunan Dongting Pharmaceutical Co., Ltd., and used according  
36  
37 228 to the second edition of the 2015 Chinese Pharmacopoeia and Drug Supplement  
38  
39 229 Application Approval (2013B02016), YBH07372010; the National Drug Standard  
40  
41 230 approval number is H43020565.  
42  
43  
44  
45  
46  
47  
48

### 49 232 **Study interventions**

50 233 Group A: 1 g of TXA + 100 mL of physiological saline will be administered  
51  
52 234 intravenously 3 hours after the operation. Group B: 1 g of TXA + 100 mL of  
53  
54 235 physiological saline will be administered intravenously 3, 6, and 12 hours after the  
55  
56 236 operation.  
57  
58  
59  
60 237

1  
2  
3 **238 Pain management and rehabilitation**  
4  
5

6 239 A cocktail injection will be given during the operation, and 0.2 g of oral celecoxib  
7  
8 240 will be given after surgery for analgesia. After the anaesthesia, the maximum angles  
9  
10 241 of flexion and extension of the ankle will be maintained for 6 seconds, and the foot  
11  
12 242 will then be allowed to relax for 5 seconds. This exercise will be performed on both  
13  
14 243 limbs in order to ensure the quadriceps contractions are equal. On the first  
15  
16 244 postoperative day, the patients will be encouraged to exercise using straight-leg-raises,  
17  
18 245 supine-knee-flexion, and knee flexion and extension in sitting. Machine-assisted  
19  
20 246 exercises, such as continuous passive motion, will begin on the third day after  
21  
22 247 surgery.  
23  
24  
25  
26  
27  
28

29 248

30  
31 **249 Antibiotics**  
32  
33

34 250 For perioperative infection prophylaxis, cefazolin (40 mg) will be administered 30  
35  
36 251 minutes before surgery and 24-48 hours after surgery.<sup>[42]</sup>  
37  
38  
39

40 252

41 **253 Prevention of lower extremity venous thrombosis**  
42  
43

44 254 Six hours after the surgery, enoxaparin sodium injections (60 mg) will be initiated and  
45  
46 255 continued daily for 14 days to prevent formation of a deep vein thrombosis.<sup>[26]</sup>  
47  
48

49 256

50  
51 **257 Outcome measures**  
52  
53

54 258 Complete blood count, hepatic function, renal function, and coagulation function will  
55  
56 259 be routinely tested before surgery. Complete blood count, inflammatory index,  
57  
58 260 inflammatory factor and coagulation index will be tested on the 1<sup>st</sup>, 3<sup>rd</sup>, 7<sup>th</sup> and 14<sup>th</sup>  
59  
60

1  
2  
3  
4 261 days after surgery. All the blood tests will be assessed in our hospital (Department of  
5  
6 262 Clinical Laboratory of Guanghai Hospital of Integrated Traditional Chinese Medicine  
7  
8  
9 263 and Western Medicine, Shanghai University of Traditional Chinese Medicine) by an  
10  
11  
12 264 inspector who is not involved in this clinical trial.  
13  
14  
15

## 16 266 **Primary outcome measures**

### 17 18 19 267 *Blood loss, haemoglobin level, and transfusion rate*

20  
21  
22 268 Blood loss is calculated according to the formulae by Nadle<sup>[43]</sup> and Gross:<sup>[44]</sup> Patient's  
23  
24 269 blood volume (PBV) =  $K1 \times \text{height}^3 \text{ (m}^3\text{)} + K2 \times \text{weight (kg)} + K3$ . Male:  $K1 =$   
25  
26  
27 270  $0.3669$ ,  $K2 = 0.03219$ ,  $K3 = 0.6041$ ; Female:  $K1 = 0.3561$ ,  $K2 = 0.03308$ ,  $K3 =$   
28  
29 271  $0.1833$ . Total blood loss (TBL) =  $\text{PBV} \times (\text{Hct}_{\text{pre}} - \text{Hct}_{\text{post}}) / \text{Hct}_{\text{ave}}$ .  $\text{Hct}_{\text{pre}}$  = the initial  
30  
31  
32 272 pre-operative Hct level;  $\text{Hct}_{\text{post}}$  = the lowest Hct post-operative;  $\text{Hct}_{\text{ave}}$  = the average  
33  
34 273 of the  $\text{Hct}_{\text{pre}}$  and  $\text{Hct}_{\text{post}}$ . The amount of intraoperative blood loss = the total volume of  
35  
36  
37 274 fluid in the negative pressure drain – the volume of normal saline. HBL volume =  
38  
39  
40 275 TBL volume – intra-operative blood loss volume.

41  
42 276 The maximum haemoglobin decline will be defined as the difference between the  
43  
44  
45 277 pre-operative Hb level and the minimal Hb level drawn post-operatively during the  
46  
47  
48 278 hospitalization and prior to any blood transfusion. The transfusion rate for patients  
49  
50  
51 279 requiring a transfusion will be determined post-operatively during the inpatient  
52  
53  
54 280 hospital stay.

55  
56 281

## 57 58 282 **Secondary outcome measures**

1  
2  
3  
4 283 *Knee function and swelling*  
5

6 284 Knee function will be measured using the American Knee Society Score (AKSS) one  
7  
8  
9 285 day before surgery and on the 3<sup>rd</sup>, 7<sup>th</sup> and 14<sup>th</sup> days after surgery. A trained researcher  
10  
11  
12 286 will educate all patients until they fully understand how to assess their knee function  
13  
14 287 using the questionnaires. The degree of swelling is defined as the postoperative  
15  
16  
17 288 circumference of the upper tibia divided by the preoperative circumference of the  
18  
19 289 upper tibia.  
20

21  
22 290

23  
24  
25 291 *Adverse event measures*  
26

27 292 Potential adverse events include deep vein thrombosis (clinical manifestations: acute  
28  
29  
30 293 onset, affected limb swelling, severe pain, or significant tenderness at the femoral  
31  
32 294 triangle or/and leg) and pulmonary embolism (clinical manifestations: cough, chest  
33  
34  
35 295 tightness, palpitations, haemoptysis, shortness of breath, dizziness, shock, cyanosis,  
36  
37  
38 296 increased respiratory rate, arteriovenous filling, or pulsation, etc.). Deep vein  
39  
40 297 thrombosis and pulmonary embolism will be diagnosed by Doppler ultrasound and  
41  
42  
43 298 computed tomography, respectively. The wound healing process and complications  
44  
45 299 (wound bleeding, haematoma, wound infection, and deep infection) will be observed  
46  
47  
48 300 and recorded in the patient's case report forms (CRFs) during hospitalization and  
49  
50  
51 301 follow-ups.  
52

53 302

54  
55 303 *Adverse event treatment*  
56

57 304 Adverse events during the follow-up period will be recorded in the CRFs, and their  
58  
59 305 relevance to drug use will be evaluated. All the adverse events will be classified in  
60



1  
2  
3 306 accordance with the five-level scoring systems (5.0) of the CTCAE. Serious adverse  
4  
5 307 events are defined as those that may cause cancer, teratogenicity, death, permanent  
6  
7 308 damage to organ function, permanent or significant disability, and prolonged hospital  
8  
9  
10 309 stay. In the case of adverse events occurring, the researcher should immediately take  
11  
12 310 appropriate measures and report these events to the hospital and ethics committees  
13  
14  
15 311 within 24 hours.  
16

312

### 313 **Data management**

314 Data on the CRFs will be put into the computer by two independent trained research  
315 assistants with a double-entry method. The hospital's independent investigators will  
316 check the data periodically.  
317

318

### 318 **Statistical analysis**

319 (1) Descriptive analysis on the characteristics of the study participants; (2) Balance  
320 analysis on the baseline values in groups; (3) Comparison of the balance of primary  
321 outcomes between groups; and (4) Comparison of secondary outcomes and safety  
322 between groups. The total rate of adverse events in the two groups will be tested by  
323 the bidirectional disordered R\*C list chi-square test. The association between the  
324 incidence of adverse events and the dose of TXA use will be described.  
325

326

327

### 327 **The Patient and public involvement**

328 Patients and the public will not be involved in the development of the research  
329 question or in the design of the study. Patients will receive oral and written  
330 information about this trial, pertaining to the benefits, risks and discomforts that they

1  
2  
3  
4 331 may experience during the study. Further, the burden of the intervention will be  
5  
6 332 assessed by patients themselves. Dissemination of the general results (no personal  
7  
8  
9 333 data) will be made available on reasonable request.  
10  
11  
12 334  
13  
14 335  
15  
16

## 17 336 **ETHICS AND DISSEMINATION**

18  
19 337 Ethics approval has been granted by the Shanghai Guanghua Hospital of Integrated  
20  
21  
22 338 Traditional Chinese Medicine and Western Medicine Ethics Committee. Written  
23  
24  
25 339 inform consent will be obtained from all participants or their authorised agents before  
26  
27 340 initiation of the study. All TXA treatments will be free. Personal data of participants  
28  
29  
30 341 will be kept strictly confidential and obtained from appropriate authors upon  
31  
32  
33 342 reasonable request. Results of the trial will be published on the Dryad website and in a  
34  
35 343 peer-reviewed journal.  
36  
37  
38  
39 344  
40  
41  
42  
43 345  
44  
45  
46

## 47 346 **DISCUSSION**

48  
49  
50 347 Controlling blood loss can facilitate the recovery from TKA surgery. Previous clinical  
51  
52  
53 348 studies have shown that high doses of TXA can reduce blood loss after TKA in  
54  
55 349 patients with osteoarthritis.<sup>[25,45,46]</sup> It has been reported that an intravenous infusion of  
56  
57  
58 350 TXA, combined with intra-articular injection may be the optimal bleeding-control  
59  
60

1  
2  
3  
4 351 scheme.<sup>[47,48]</sup> Previous studies have shown that knee joint swelling after TKA is  
5  
6 352 associated with HBL in the joint cavity. TXA can reduce postoperative HBL, thereby  
7  
8  
9 353 relieving the swelling around the joint.<sup>[11]</sup> Given that plasminogen activators play an  
10  
11 354 important role in RA-involved inflammation, the dissolution of fibrin will trigger an  
12  
13  
14 355 inflammatory response.<sup>[49]</sup> Therefore, we suspect that multiple doses of TXA in the  
15  
16  
17 356 perioperative period may exert an auxiliary anti-inflammatory effect.

18  
19 357 Enhanced recovery after surgery is strongly advocated, and the management of  
20  
21  
22 358 perioperative blood loss is an essential component. The RA patients aged 50-80 years  
23  
24  
25 359 undergoing TKA have a lower risk of requiring a revision, and are likely to obtain  
26  
27  
28 360 higher knee function and present with fewer complications.<sup>[50,51]</sup> In order to reduce  
29  
30  
31 361 bias caused by a wide age range, patients aged 50-75 will be selected. This study will  
32  
33  
34 362 provide new evidence for managing perioperative blood loss in TKA in Chinese RA  
35  
36  
37 363 patients if the results indicate that the administration of the additional three doses of  
38  
39  
40 364 TXA therapy after surgery is beneficial over a single dose.

41 365

42  
43 366

44  
45 367 **Author Contributions** B-xK, HX and L-bX conceived the study while B-xK and HX  
46  
47  
48 368 drafted the study protocol, B-xK and HX contributed equally to this work and should  
49  
50  
51 369 be regarded as co-first authors. The study protocol was designed by C-xG, SZ, JZ, JX,  
52  
53  
54 370 S-tS, Y-hM, and W-tZ. All authors approved the final manuscript of this study  
55  
56  
57 371 protocol.

58  
59 372 **Funding** This work will be supported by the Foundation of Health and Family  
60

1  
2  
3  
4  
5  
6  
7  
8  
9  
10  
11  
12  
13  
14  
15  
16  
17  
18  
19  
20  
21  
22  
23  
24  
25  
26  
27  
28  
29  
30  
31  
32  
33  
34  
35  
36  
37  
38  
39  
40  
41  
42  
43  
44  
45  
46  
47  
48  
49  
50  
51  
52  
53  
54  
55  
56  
57  
58  
59  
60

373 planning Commission of Shanghai (Grant NO. ZY (2018-2020)-FWTX-6023).

374 **Conflicts of Interests** The authors declared that there are no potential conflicts of  
375 interest with respect to the research, authorship, and/or publication of this study.

376 **Patient consent for publication** Written informed consent will be obtained.

377 **Ethics approval** This study has been approved by the Shanghai Guanghua Hospital  
378 of Integrated Traditional Chinese Medicine and Western Medicine Ethics Committee  
379 (NO. 2019-K-13). And any modification of the protocol will be reported to and  
380 approved by this ethics committee.

381 **Provenance and peer review** Not commissioned; externally peer reviewed.

## 384 REFERENCES

- 385 1 Goyal L, Shah PJ, Yadav RN, *et al.* Anaemia in newly diagnosed patients of rheumatoid  
386 arthritis and its correlation with disease activity. *J Assoc Physicians India* 2018;66:26-9.
- 387 2 Minichiello E, Semerano L, Boissier MC. Time trends in the incidence, prevalence, and  
388 severity of rheumatoid arthritis: A systematic literature review. *Jt Bone Spine*  
389 2016;83:625-30. doi:10.1016/j.jbspin.2016.07.007
- 390 3 Shichikawa K, Inoue K, Hirota S, *et al.* Changes in the incidence and prevalence of  
391 rheumatoid arthritis in Kamitonda, Wakayama, Japan, 1965-1996. *Ann Rheum Dis*  
392 1999;58:751-6. doi:10.1136/ard.58.12.751
- 393 4 Yan D, Yang J, Pei F. Total knee arthroplasty treatment of rheumatoid arthritis with severe  
394 versus moderate flexion contracture. *J Orthop Surg Res* 2013;8:41.  
395 doi:10.1186/1749-799X-8-41
- 396 5 Louie GH, Ward MM. Changes in the rates of joint surgery among patients with rheumatoid  
397 arthritis in California, 1983-2007. *Ann. Rheum. Dis.* 2010;69:868-71.  
398 doi:10.1136/ard.2009.112474

- 1  
2  
3  
4 399 6 Ker K, Roberts I. Tranexamic acid for surgical bleeding. *BMJ* 2014;349(aug12  
5 400 11):g4934-g4934. doi:10.1136/bmj.g4934  
6  
7 401 7 Freedman J, Luke K, Escobar M, et al. Experience of a network of transfusion coordinators for  
8 402 blood conservation (Ontario Transfusion Coordinators [ONTraC]). *Transfusion*  
9 403 2008;48(2):237-250. doi:10.1111/j.1537-2995.2007.01515.x  
10  
11 404 8 McCormack PL. Tranexamic Acid: A review of its use in the treatment of hyperfibrinolysis.  
12 405 *Drugs* 2012;72:585-617. doi:10.2165/11209070-000000000-00000  
13  
14 406 9 Padjen I, Öhler L, Studenic P, et al. Clinical meaning and implications of serum hemoglobin  
15 407 levels in patients with rheumatoid arthritis. *Semin Arthritis Rheum* 2017;47:193-8.  
16 408 doi:10.1016/j.semarthrit.2017.03.001  
17  
18 409 10 Sehat KR, Evans R, Newman JH. How much blood is really lost in total knee arthroplasty?  
19 410 Correct blood loss management should take hidden loss into account. *Knee* 2000;7:151-5.  
20 411 doi:10.1016/S0968-0160(00)00047-8  
21  
22 412 11 Ishida K, Tsumura N, Kitagawa A, et al. Intra-articular injection of tranexamic acid reduces  
23 413 not only blood loss but also knee joint swelling after total knee arthroplasty. *Int Orthop*  
24 414 2011;35:1639-45. doi:10.1007/s00264-010-1205-3  
25  
26 415 12 Liu X, Zhang X, Chen Y, et al. Hidden blood loss after total hip arthroplasty. *The Journal of*  
27 416 *arthroplasty* 2011;26:1100-11050. doi:10.1016/j.arth.2010.11.013  
28  
29 417 13 Tarwala R, Dorr LD, Gilbert PK, et al. Tourniquet use during cementation only during total  
30 418 knee arthroplasty: A randomized trial knee. *Clin Orthop Relat Res* 2014;472:169-74.  
31 419 doi:10.1007/s11999-013-3124-2  
32  
33 420 14 Arthur JR, Spangehl MJ. Tourniquet Use in Total Knee Arthroplasty. *Journal of Knee*  
34 421 *Surgery* 2019;32:719-29. doi:10.1055/s-0039-1681035  
35  
36 422 15 Schnettler T, Papillon N, Rees H. Use of a Tourniquet in Total Knee Arthroplasty Causes a  
37 423 Paradoxical Increase in Total Blood Loss. *Journal of Bone & Joint Surgery* 2017;99:1331-6.  
38 424 doi:10.2106/JBJS.16.00750  
39  
40 425 16 Aglietti P, Baldini A, Vena LM, et al. Effect of tourniquet use on activation of coagulation in  
41 426 total knee replacement. *Clin Orthop Relat Res* 2000;85:169-77.  
42 427 doi:10.1097/00003086-200002000-00021  
43  
44 428 17 Benoni G, Lethagen S, Fredin H. The effect of tranexamic acid on local and plasma

- 1  
2  
3  
4 429 fibrinolysis during total knee arthroplasty. *Thromb Res* 1997;85:195-206.  
5  
6 430 doi:10.1016/S0049-3848(97)00004-2  
7  
8 431 18 Jennings JD, Solarz MK, Haydel C. Application of Tranexamic Acid in Trauma and  
9  
10 432 Orthopedic Surgery. *Orthop Clin North Am* 2016;47:137-43. doi:10.1016/j.ocl.2015.08.014  
11  
12 433 19 Napolitano LM, Cohen MJ, Cotton BA, *et al.* Tranexamic acid in trauma. *J Trauma Acute*  
13  
14 434 *Care Surg* 2013;74:1575-86. doi:10.1097/TA.0b013e318292cc54  
15  
16 435 20 CRASH-2 trial collaborators, Shakur H, Roberts I, *et al.* Effects of tranexamic acid on death,  
17  
18 436 vascular occlusive events, and blood transfusion in trauma patients with significant  
19  
20 437 haemorrhage (CRASH-2): a randomised, placebo-controlled trial. *Lancet* 2010;376:23-32.  
21  
22 438 doi:10.1016/S0140-6736(10)60835-5  
23  
24 439 21 Adravanti P, Di Salvo E, Calafiore G, *et al.* A prospective, randomized, comparative study of  
25  
26 440 intravenous alone and combined intravenous and intraarticular administration of tranexamic  
27  
28 441 acid in primary total knee replacement. *Arthroplast Today* 2018;4:85-8.  
29  
30 442 doi:10.1016/j.artd.2017.08.004  
31  
32 443 22 Prakash J, Seon JK, Park YJ, *et al.* A randomized control trial to evaluate the effectiveness of  
33  
34 444 intravenous, intraarticular and topical wash regimes of tranexamic acid in primary total knee  
35  
36 445 arthroplasty. *J Orthop Surg* 2017;25:1-7. doi:10.1177/2309499017693529  
37  
38 446 23 Mao Z, Yue B, Wang Y, *et al.* A comparative, retrospective study of peri-articular and  
39  
40 447 intra-articular injection of tranexamic acid for the management of postoperative blood loss  
41  
42 448 after total knee arthroplasty. *BMC Musculoskelet Disord* 2016;17:1-8.  
43  
44 449 doi:10.1186/s12891-016-1293-3  
45  
46 450 24 Jansen JA, Lameijer JRC, Snoeker BAM. Combined intravenous, topical and oral tranexamic  
47  
48 451 acid administration in total knee replacement: Evaluation of safety in patients with previous  
49  
50 452 thromboembolism and effect on hemoglobin level and transfusion rate. *Knee*  
51  
52 453 2017;24:1206-12. doi:10.1016/j.knee.2017.07.004  
53  
54 454 25 Lei Y, Xie J, Xu B, *et al.* The efficacy and safety of multiple-dose intravenous tranexamic  
55  
56 455 acid on blood loss following total knee arthroplasty: a randomized controlled trial. *Int Orthop*  
57  
58 456 2017;41:2053-9. doi:10.1007/s00264-017-3519-x  
59  
60 457 26 Zhen Y, Zongke Z, Fuxing P, *et al.* Chinese Hip and Total Knee Arthroplasty Surgery  
458 Perioperative Anti-fibrinolytic Drug Sequential Anticoagulant Application Programme

- 1  
2  
3  
4 459 Expert  
5  
6 460 Consensus. *Chinese Journal of Bone and Joint Surgery* 2015;8:281-5.  
7  
8 461 doi:10.3969/j.issn.2095-9958.2015.04-001  
9  
10 462 27 Xie J, Hu Q, Huang Z, *et al.* Comparison of three routes of administration of tranexamic acid  
11  
12 463 in primary unilateral total knee arthroplasty: Analysis of a national database. *Thromb Res*  
13  
14 464 2019;173:96-101. doi:10.1016/j.thromres.2018.11.025  
15  
16 465 28 Yue C, Kang P, Yang P, *et al.* Topical application of tranexamic acid in primary total hip  
17  
18 466 arthroplasty: A randomized double-blind controlled trial. *J Arthroplasty* 2014;29:2452-6.  
19  
20 467 doi:10.1016/j.arth.2014.03.032  
21  
22 468 29 Liu W, Yang C, Huang X, *et al.* Tranexamic Acid Reduces Occult Blood Loss, Blood  
23  
24 469 Transfusion, and Improves Recovery of Knee Function after Total Knee Arthroplasty: A  
25  
26 470 Comparative Study. *J Knee Surg* 2018;31:239-46. doi:10.1055/s-0037-1602248  
27  
28 471 30 Yang Y, Lv YM, Ding PJ, *et al.* The reduction in blood loss with intra-articular injection of  
29  
30 472 tranexamic acid in unilateral total knee arthroplasty without operative drains: A randomized  
31  
32 473 controlled trial. *Eur J Orthop Surg Traumatol* 2015;25:135-9.  
33  
34 474 doi:10.1007/s00590-014-1461-9  
35  
36 475 31 Young B, Moondi P. A questionnaire-based survey investigating the current use of  
37  
38 476 tranexamic acid in traumatic haemorrhage and elective hip and knee arthroplasty. *JRSM*  
39  
40 477 *Open* 2014;5:204253331351694. doi:10.1177/2042533313516949  
41  
42 478 32 Cid J, Lozano M. Tranexamic acid reduces allogeneic red cell transfusions in patients  
43  
44 479 undergoing total knee arthroplasty: Results of a meta-analysis of randomized controlled  
45  
46 480 trials. *Transfusion* 2005;45:1302-7. doi:10.1111/j.1537-2995.2005.00204.x  
47  
48 481 33 Blanié A, Bellamy L, Rhayem Y, *et al.* Duration of postoperative fibrinolysis after total hip  
49  
50 482 or knee replacement: A laboratory follow-up study. *Thromb Res* 2013;131:e6-11.  
51  
52 483 doi:10.1016/j.thromres.2012.11.006  
53  
54 484 34 Hunt BJ. The current place of tranexamic acid in the management of bleeding. *Anaesthesia*  
55  
56 485 2015;70:e18-53. doi:10.1111/anae.12910  
57  
58 486 35 Demos HA, Lin ZX, Barfield WR, *et al.* Process Improvement Project Using Tranexamic  
59  
487 Acid Is Cost-Effective in Reducing Blood Loss and Transfusions After Total Hip and Total  
488  
488 488 Knee Arthroplasty. *J Arthroplasty* 2017;32:2375-80. doi:10.1016/j.arth.2017.02.068

- 1  
2  
3  
4 489 36 Tang Y, Wen Y, Li W, *et al.* The efficacy and safety of multiple doses of oral tranexamic  
5 acid on blood loss, inflammatory and fibrinolysis response following total knee arthroplasty:  
6 490  
7 491 A randomized controlled trial. *Int J Surg* 2019;65:45-51. doi:10.1016/j.ijssu.2019.03.011  
8  
9 492 37 Silman A J. The 1987 revised American Rheumatism Association criteria for rheumatoid  
10 493  
11 arthritis. *Br. J. Rheumatol* 1988;27:341-3. doi:10.1093/rheumatology/27.5.341  
12  
13 494 38 Britsemmer K, Ursum J, Gerritsen M, *et al.* Validation of the 2010 ACR/EULAR  
14 495  
15 classification criteria for rheumatoid arthritis: Slight improvement over the 1987 ACR  
16 496  
17 criteria. *Ann Rheum Dis* 2011;70:1468-70. doi:10.1136/ard.2010.148619  
18  
19 497 39 Kohn MD, Sassoos AA, Fernando ND. Classifications in Brief: Kellgren-Lawrence  
20 498  
21 Classification of Osteoarthritis. *Clin Orthop Relat Res* 2016;474:1886-93.  
22  
23 499 doi:10.1007/s11999-016-4732-4  
24  
25 500 40 Krause ML, Matteson EL. Perioperative management of the patient with rheumatoid arthritis.  
26 501  
27 *World J Orthop* 2014;5:283-91. doi:10.5312/wjo.v5.i3.283  
28  
29 502 41 Thorsness RJ, Hammert WC. Perioperative management of rheumatoid medications. *J Hand*  
30 503  
31 *Surg Am* 2012;37:1928-31. doi:10.1016/j.jhsa.2012.04.015  
32  
33 504 42 Lee JT. Commentary on the "Guideline for Prevention of Surgical Site Infection, 1999".  
34 505  
35 *American Journal of Infection Control* 1999;27:96. doi:10.1016/S0196-6553(99)70094-5  
36  
37 506 43 Nadler SB, Hidalgo JH, Bloch T. Prediction of blood volume in normal human adults.  
38 507  
39 *Surgery* 1962;51:224-32. doi:http://dx.doi.org/  
40  
41 508 44 Gross JB. Estimating allowable blood loss: Corrected for dilution. *Anesthesiology*  
42 509  
43 1983;58:277-80. doi:10.1097/0000542-198303000-00016  
44  
45 510 45 Park JH, Choi SW, Shin EH, *et al.* The optimal protocol to reduce blood loss and blood  
46 511  
47 transfusion after unilateral total knee replacement: Low-dose IA-TXA plus 30-min drain  
48 512  
49 clamping versus drainage clamping for the first 3 h without IA-TXA. *J Orthop Surg*  
50 513  
51 2017;25:1-7. doi:10.1177/2309499017731626  
52  
53 514 46 Voorn VMA, Marang-van de Mheen PJ, van der Hout A, *et al.* The effectiveness of a  
54 515  
55 de-implementation strategy to reduce low-value blood management techniques in primary hip  
56 516  
57 and knee arthroplasty: A pragmatic cluster-randomized controlled trial. *Implement Sci*  
58 517  
59 2017;12:72. doi:10.1186/s13012-017-0601-0  
60 518 47 Mi B, Liu G, Lv H, *et al.* Is combined use of intravenous and intraarticular tranexamic acid



1  
2  
3  
4 519 superior to intravenous or intraarticular tranexamic acid alone in total knee arthroplasty? A  
5 520 meta-analysis of randomized controlled trials. *J Orthop Surg Res* 2017;12:1-9.

6  
7 521 doi:10.1186/s13018-017-0559-2

8  
9 522 48 Iseki T, Tsukada S, Wakui M, *et al*. Intravenous tranexamic acid only versus combined  
10 523 intravenous and intra-articular tranexamic acid for perioperative blood loss in patients  
11 524 undergoing total knee arthroplasty. *Eur J Orthop Surg Traumatol* 2018;28:1397-402.

12  
13 525 doi:10.1007/s00590-018-2210-2

14  
15 526 49 Li J, Ny A, Leonardsson G, *et al*. The plasminogen activator/plasmin system is essential for  
16 527 development of the joint inflammatory phase of collagen type II-induced arthritis. *Am J*  
17 528 *Pathol* 2005;166:783-92. doi:10.1016/S0002-9440(10)62299-7

18  
19 529 50 Goh GSH, Liow MHL, Razak HRBA, *et al*. Patient-Reported Outcomes, Quality of  
20 530 Life, and Satisfaction Rates in Young Patients Aged 50 Years or Younger After Total Knee  
21 531 Arthroplasty. *J Arthroplasty* 2017;32:419-25. doi:10.1016/j.arth.2016.07.043

22  
23 532 51 Boyd JA, Gradisar IM. Total knee arthroplasty after knee arthroscopy in patients older than  
24 533 50 years. *Orthopedics* 2016;39:e1041-4. doi:10.3928/01477447-20160719-01

25  
26 534

27  
28 535 Figure 1: The study flow diagram, including participants recruitment, eligibility,  
29 536 screening, randomisation, allocation concealment and outcome assessments. TXA,  
30 537 tranexamic acid; D1, the 1<sup>st</sup> day after surgery; D3, the 3<sup>rd</sup> day after surgery; D7, the 7<sup>th</sup>  
31 538 day after surgery; D14, the 14<sup>th</sup> day after surgery.



Figure 1: The study flow diagram, including participants recruitment, eligibility, screening, randomisation, allocation concealment and outcome assessments. TXA, tranexamic acid; D1, the 1st day after surgery; D3, the 3rd day after surgery; D7, the 7th day after surgery; D14, the 14th day after surgery.

163x195mm (300 x 300 DPI)

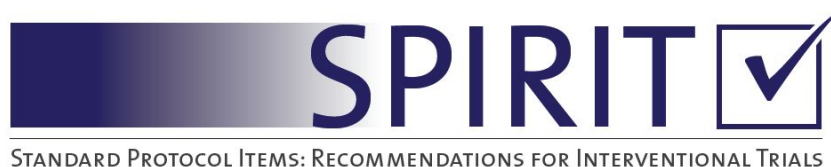

STANDARD PROTOCOL ITEMS: RECOMMENDATIONS FOR INTERVENTIONAL TRIALS

SPIRIT 2013 Checklist: Recommended items to address in a clinical trial protocol and related documents\*

| Section/item                      | Item No | Description                                                                                                                                                                                                                                                                              | Line Number on which item is reported |
|-----------------------------------|---------|------------------------------------------------------------------------------------------------------------------------------------------------------------------------------------------------------------------------------------------------------------------------------------------|---------------------------------------|
| <b>Administrative information</b> |         |                                                                                                                                                                                                                                                                                          |                                       |
| Title                             | 1       | Descriptive title identifying the study design, population, interventions, and, if applicable, trial acronym                                                                                                                                                                             | Line 1-3.                             |
| Trial registration                | 2a      | Trial identifier and registry name. If not yet registered, name of intended registry                                                                                                                                                                                                     | Line 63.                              |
|                                   | 2b      | All items from the World Health Organization Trial Registration Data Set                                                                                                                                                                                                                 |                                       |
| Protocol version                  | 3       | Date and version identifier                                                                                                                                                                                                                                                              |                                       |
| Funding                           | 4       | Sources and types of financial, material, and other support                                                                                                                                                                                                                              | Line 371-372.                         |
| Roles and responsibilities        | 5a      | Names, affiliations, and roles of protocol contributors                                                                                                                                                                                                                                  | Line 7-37; 139-143                    |
|                                   | 5b      | Name and contact information for the trial sponsor                                                                                                                                                                                                                                       | Line 39-42.                           |
|                                   | 5c      | Role of study sponsor and funders, if any, in study design; collection, management, analysis, and interpretation of data; writing of the report; and the decision to submit the report for publication, including whether they will have ultimate authority over any of these activities | Line 142-143; 366-370.                |
|                                   | 5d      | Composition, roles, and responsibilities of the coordinating centre, steering committee, endpoint adjudication committee, data management team, and other individuals or groups overseeing the trial, if applicable (see Item 21a for data monitoring committee)                         |                                       |
| <b>Introduction</b>               |         |                                                                                                                                                                                                                                                                                          |                                       |

|                                                                                                          |                                                           |     |                                                                                                                                                                                                                                                                                                                                                                                |                    |
|----------------------------------------------------------------------------------------------------------|-----------------------------------------------------------|-----|--------------------------------------------------------------------------------------------------------------------------------------------------------------------------------------------------------------------------------------------------------------------------------------------------------------------------------------------------------------------------------|--------------------|
| 1<br>2<br>3<br>4<br>5<br>6                                                                               | Background and rationale                                  | 6a  | Description of research question and justification for undertaking the trial, including summary of relevant studies (published and unpublished) examining benefits and harms for each intervention                                                                                                                                                                             | Line 83-131.       |
| 7<br>8                                                                                                   |                                                           | 6b  | Explanation for choice of comparators                                                                                                                                                                                                                                                                                                                                          | Line 116-131.      |
| 9<br>10                                                                                                  | Objectives                                                | 7   | Specific objectives or hypotheses                                                                                                                                                                                                                                                                                                                                              | Line 360-363.      |
| 11<br>12<br>13<br>14<br>15<br>16                                                                         | Trial design                                              | 8   | Description of trial design including type of trial (eg, parallel group, crossover, factorial, single group), allocation ratio, and framework (eg, superiority, equivalence, noninferiority, exploratory)                                                                                                                                                                      | Line 2-3; 157-169. |
| 17                                                                                                       | <b>Methods: Participants, interventions, and outcomes</b> |     |                                                                                                                                                                                                                                                                                                                                                                                |                    |
| 18<br>19<br>20<br>21<br>22<br>23<br>24                                                                   | Study setting                                             | 9   | Description of study settings (eg, community clinic, academic hospital) and list of countries where data will be collected. Reference to where list of study sites can be obtained                                                                                                                                                                                             | Line 136-138; 63.  |
| 25<br>26<br>27<br>28<br>29<br>30                                                                         | Eligibility criteria                                      | 10  | Inclusion and exclusion criteria for participants. If applicable, eligibility criteria for study centres and individuals who will perform the interventions (eg, surgeons, psychotherapists)                                                                                                                                                                                   | Line 171-188.      |
| 31<br>32<br>33<br>34<br>35<br>36<br>37<br>38<br>39<br>40<br>41<br>42<br>43<br>44<br>45<br>46<br>47<br>48 | Interventions                                             | 11a | Interventions for each group with sufficient detail to allow replication, including how and when they will be administered                                                                                                                                                                                                                                                     | Line 232-236.      |
|                                                                                                          |                                                           | 11b | Criteria for discontinuing or modifying allocated interventions for a given trial participant (eg, drug dose change in response to harms, participant request, or improving/worsening disease)                                                                                                                                                                                 | Line 194-200.      |
|                                                                                                          |                                                           | 11c | Strategies to improve adherence to intervention protocols, and any procedures for monitoring adherence (eg, drug tablet return, laboratory tests)                                                                                                                                                                                                                              |                    |
|                                                                                                          |                                                           | 11d | Relevant concomitant care and interventions that are permitted or prohibited during the trial                                                                                                                                                                                                                                                                                  |                    |
| 49<br>50<br>51<br>52<br>53<br>54<br>55<br>56<br>57<br>58<br>59<br>60                                     | Outcomes                                                  | 12  | Primary, secondary, and other outcomes, including the specific measurement variable (eg, systolic blood pressure), analysis metric (eg, change from baseline, final value, time to event), method of aggregation (eg, median, proportion), and time point for each outcome. Explanation of the clinical relevance of chosen efficacy and harm outcomes is strongly recommended | Line 265-310.      |

|                                                                     |     |                                                                                                                                                                                                                                                                                                                                                          |                               |
|---------------------------------------------------------------------|-----|----------------------------------------------------------------------------------------------------------------------------------------------------------------------------------------------------------------------------------------------------------------------------------------------------------------------------------------------------------|-------------------------------|
| Participant timeline                                                | 13  | Time schedule of enrolment, interventions (including any run-ins and washouts), assessments, and visits for participants. A schematic diagram is highly recommended (see Figure)                                                                                                                                                                         | Line 258-259 and see Figure1. |
| Sample size                                                         | 14  | Estimated number of participants needed to achieve study objectives and how it was determined, including clinical and statistical assumptions supporting any sample size calculations                                                                                                                                                                    | Line 149-155.                 |
| Recruitment                                                         | 15  | Strategies for achieving adequate participant enrolment to reach target sample size                                                                                                                                                                                                                                                                      | Line 138-139.                 |
| <b>Methods: Assignment of interventions (for controlled trials)</b> |     |                                                                                                                                                                                                                                                                                                                                                          |                               |
| Allocation:                                                         |     |                                                                                                                                                                                                                                                                                                                                                          |                               |
| Sequence generation                                                 | 16a | Method of generating the allocation sequence (eg, computer-generated random numbers), and list of any factors for stratification. To reduce predictability of a random sequence, details of any planned restriction (eg, blocking) should be provided in a separate document that is unavailable to those who enrol participants or assign interventions | Line 158-161.                 |
| Allocation concealment mechanism                                    | 16b | Mechanism of implementing the allocation sequence (eg, central telephone; sequentially numbered, opaque, sealed envelopes), describing any steps to conceal the sequence until interventions are assigned                                                                                                                                                | Line 161-164.                 |
| Implementation                                                      | 16c | Who will generate the allocation sequence, who will enrol participants, and who will assign participants to interventions                                                                                                                                                                                                                                |                               |
| Blinding (masking)                                                  | 17a | Who will be blinded after assignment to interventions (eg, trial participants, care providers, outcome assessors, data analysts), and how                                                                                                                                                                                                                | Line 167-169.                 |
|                                                                     | 17b | If blinded, circumstances under which unblinding is permissible, and procedure for revealing a participant's allocated intervention during the trial                                                                                                                                                                                                     |                               |
| <b>Methods: Data collection, management, and analysis</b>           |     |                                                                                                                                                                                                                                                                                                                                                          |                               |

|                                                          |                            |     |                                                                                                                                                                                                                                                                                                                                                                                                              |                        |
|----------------------------------------------------------|----------------------------|-----|--------------------------------------------------------------------------------------------------------------------------------------------------------------------------------------------------------------------------------------------------------------------------------------------------------------------------------------------------------------------------------------------------------------|------------------------|
| 1<br>2<br>3<br>4<br>5<br>6<br>7<br>8<br>9<br>10<br>11    | Data collection methods    | 18a | Plans for assessment and collection of outcome, baseline, and other trial data, including any related processes to promote data quality (eg, duplicate measurements, training of assessors) and a description of study instruments (eg, questionnaires, laboratory tests) along with their reliability and validity, if known. Reference to where data collection forms can be found, if not in the protocol | Line 313-315.          |
| 12<br>13<br>14<br>15<br>16<br>17                         |                            | 18b | Plans to promote participant retention and complete follow-up, including list of any outcome data to be collected for participants who discontinue or deviate from intervention protocols                                                                                                                                                                                                                    |                        |
| 18<br>19<br>20<br>21<br>22<br>23<br>24<br>25             | Data management            | 19  | Plans for data entry, coding, security, and storage, including any related processes to promote data quality (eg, double data entry; range checks for data values). Reference to where details of data management procedures can be found, if not in the protocol                                                                                                                                            | Line 161-163; 313-315. |
| 26<br>27<br>28<br>29<br>30<br>31                         | Statistical methods        | 20a | Statistical methods for analysing primary and secondary outcomes. Reference to where other details of the statistical analysis plan can be found, if not in the protocol                                                                                                                                                                                                                                     | Line 317-323.          |
| 32<br>33<br>34                                           |                            | 20b | Methods for any additional analyses (eg, subgroup and adjusted analyses)                                                                                                                                                                                                                                                                                                                                     |                        |
| 35<br>36<br>37<br>38<br>39<br>40                         |                            | 20c | Definition of analysis population relating to protocol non-adherence (eg, as randomised analysis), and any statistical methods to handle missing data (eg, multiple imputation)                                                                                                                                                                                                                              |                        |
| 41<br>42                                                 | <b>Methods: Monitoring</b> |     |                                                                                                                                                                                                                                                                                                                                                                                                              |                        |
| 43<br>44<br>45<br>46<br>47<br>48<br>49<br>50<br>51<br>52 | Data monitoring            | 21a | Composition of data monitoring committee (DMC); summary of its role and reporting structure; statement of whether it is independent from the sponsor and competing interests; and reference to where further details about its charter can be found, if not in the protocol. Alternatively, an explanation of why a DMC is not needed                                                                        |                        |
| 53<br>54<br>55<br>56<br>57<br>58<br>59<br>60             |                            | 21b | Description of any interim analyses and stopping guidelines, including who will have access to these interim results and make the final decision to terminate the trial                                                                                                                                                                                                                                      |                        |

|                                 |     |                                                                                                                                                                                                                                                                                     |               |
|---------------------------------|-----|-------------------------------------------------------------------------------------------------------------------------------------------------------------------------------------------------------------------------------------------------------------------------------------|---------------|
| Harms                           | 22  | Plans for collecting, assessing, reporting, and managing solicited and spontaneously reported adverse events and other unintended effects of trial interventions or trial conduct                                                                                                   |               |
| Auditing                        | 23  | Frequency and procedures for auditing trial conduct, if any, and whether the process will be independent from investigators and the sponsor                                                                                                                                         |               |
| <b>Ethics and dissemination</b> |     |                                                                                                                                                                                                                                                                                     |               |
| Research ethics approval        | 24  | Plans for seeking research ethics committee/institutional review board (REC/IRB) approval                                                                                                                                                                                           | Line 335-342  |
| Protocol amendments             | 25  | Plans for communicating important protocol modifications (eg, changes to eligibility criteria, outcomes, analyses) to relevant parties (eg, investigators, REC/IRBs, trial participants, trial registries, journals, regulators)                                                    |               |
| Consent or assent               | 26a | Who will obtain informed consent or assent from potential trial participants or authorised surrogates, and how (see Item 32)                                                                                                                                                        | Line 375.     |
|                                 | 26b | Additional consent provisions for collection and use of participant data and biological specimens in ancillary studies, if applicable                                                                                                                                               |               |
| Confidentiality                 | 27  | How personal information about potential and enrolled participants will be collected, shared, and maintained in order to protect confidentiality before, during, and after the trial                                                                                                | Line 327-332. |
| Declaration of interests        | 28  | Financial and other competing interests for principal investigators for the overall trial and each study site                                                                                                                                                                       | Line 371-374. |
| Access to data                  | 29  | Statement of who will have access to the final trial dataset, and disclosure of contractual agreements that limit such access for investigators                                                                                                                                     | Line 341-342. |
| Ancillary and post-trial care   | 30  | Provisions, if any, for ancillary and post-trial care, and for compensation to those who suffer harm from trial participation                                                                                                                                                       | Line 305-310  |
| Dissemination policy            | 31a | Plans for investigators and sponsor to communicate trial results to participants, healthcare professionals, the public, and other relevant groups (eg, via publication, reporting in results databases, or other data sharing arrangements), including any publication restrictions | Line 339-342. |

|                            |     |                                                                                                                                                                                                |               |
|----------------------------|-----|------------------------------------------------------------------------------------------------------------------------------------------------------------------------------------------------|---------------|
|                            | 31b | Authorship eligibility guidelines and any intended use of professional writers                                                                                                                 |               |
|                            | 31c | Plans, if any, for granting public access to the full protocol, participant-level dataset, and statistical code                                                                                | Line 339-342. |
| <b>Appendices</b>          |     |                                                                                                                                                                                                |               |
| Informed consent materials | 32  | Model consent form and other related documentation given to participants and authorised surrogates                                                                                             |               |
| Biological specimens       | 33  | Plans for collection, laboratory evaluation, and storage of biological specimens for genetic or molecular analysis in the current trial and for future use in ancillary studies, if applicable |               |

\*It is strongly recommended that this checklist be read in conjunction with the SPIRIT 2013 Explanation & Elaboration for important clarification on the items. Amendments to the protocol should be tracked and dated. The SPIRIT checklist is copyrighted by the SPIRIT Group under the Creative Commons "[Attribution-NonCommercial-NoDerivs 3.0 Unported](https://creativecommons.org/licenses/by-nc-nd/3.0/)" license.
